# Supplementary material
Source: publisher figshare collection journal article supplement (https://gsajournals.figshare.com/ndownloader/files/13198784)
Supplement: Supplementary file 1 [file 13198784]

## Sheet: Supplemental Table 3.csv
	baseMeanRibo	l2FCRibo	lfcSERibo	padjRibo	baseMeanMrna	l2FCMrna	lfcSEMrna	padjMrna	baseMeanTrl	l2FCTrl	lfcSETrl	padjTrl	gene	desc
YHR039C	142.973	0.132376	0.341934	0.992604	142.973	0.105313	0.454659	0.999906	142.973	0.0270629	0.568882	0.999827	MSC7	Protein of unknown function, green fluorescent protein (GFP)-fusion protein localizes to the endoplasmic reticulum; msc7 mutants are defective in directing meiotic recombination events to homologous chromatids
YBL027W	2831.89	-0.515921	0.312756	0.959028	2831.89	0.0903699	0.417797	0.999906	2831.89	-0.60629	0.521891	0.999827	RPL19B	Protein component of the large (60S) ribosomal subunit, nearly identical to Rpl19Ap and has similarity to rat L19 ribosomal protein; rpl19a and rpl19b single null mutations result in slow growth, while the double null mutation is lethal
YHR041C	59.1694	0.234608	0.417902	NA	59.1694	0.151399	0.530066	0.999906	59.1694	0.0832085	0.674969	0.999827	SRB2	Subunit of the RNA polymerase II mediator complex; associates with core polymerase subunits to form the RNA polymerase II holoenzyme; general transcription factor involved in telomere maintenance
YMR078C	48.2051	0.823715	0.481787	NA	48.2051	-0.0106853	0.566247	0.999906	48.2051	0.8344	0.743446	0.999827	CTF18	Subunit of a complex with Ctf8p that shares some subunits with Replication Factor C and is required for sister chromatid cohesion; may have overlapping functions with Rad24p in the DNA damage replication checkpoint
YBR198C	119.996	-0.24232	0.340641	0.967178	119.996	0.196667	0.444979	0.999906	119.996	-0.438987	0.560391	0.999827	TAF5	Subunit (90 kDa) of TFIID and SAGA complexes, involved in RNA polymerase II transcription initiation and in chromatin modification
YKL175W	103.215	0.442581	0.352044	0.959028	103.215	-0.509064	0.469958	0.999906	103.215	0.951645	0.587204	0.999827	ZRT3	Vacuolar membrane zinc transporter, transports zinc from storage in the vacuole to the cytoplasm when needed; transcription is induced under conditions of zinc deficiency
YDR350C	31.4279	-0.815438	0.529244	NA	31.4279	0.164269	0.594394	0.999906	31.4279	-0.979706	0.795891	0.999827	ATP22	Specific translational activator for the mitochondrial ATP6 mRNA, encoding a subunit of F1F0 ATP synthase; localized to the mitochondrial inner membrane
YBR275C	102.919	0.130994	0.403251	0.992604	102.919	-0.0587174	0.505508	0.999906	102.919	0.189711	0.646642	0.999827	RIF1	Protein that binds to the Rap1p C-terminus and acts synergistically with Rif2p to help control telomere length and establish telomeric silencing; deletion results in telomere elongation
YJL174W	162.442	0.293223	0.324176	0.959028	162.442	-0.164776	0.434098	0.999906	162.442	0.457999	0.541783	0.999827	KRE9	Glycoprotein involved in cell wall beta-glucan assembly; null mutation leads to severe growth defects, aberrant multibudded morphology, and mating defects
YKL210W	960.748	0.123111	0.303315	0.992604	960.748	0.175949	0.409309	0.999906	960.748	-0.0528381	0.509445	0.999827	UBA1	Ubiquitin activating enzyme (E1), involved in ubiquitin-mediated protein degradation and essential for viability
YNL336W	224.802	0.351641	0.314431	0.959028	224.802	1.55808	0.45001	0.274463	224.802	-1.20644	0.548931	0.999827	COS1	Protein of unknown function, member of the DUP380 subfamily of conserved, often subtelomerically-encoded proteins
YLL015W	133.308	0.0053771	0.402583	0.998038	133.308	-0.129101	0.509457	0.999906	133.308	0.134478	0.649321	0.999827	BPT1	ABC type transmembrane transporter of MRP/CFTR family, found in vacuolar membrane, involved in the transport of unconjugated bilirubin and in heavy metal detoxification via glutathione conjugates, along with Ycf1p
YKL012W	42.88	-0.818524	0.457589	NA	42.88	0.261187	0.548275	0.999906	42.88	-1.07971	0.714165	0.999827	PRP40	U1 snRNP protein involved in splicing, interacts with the branchpoint-binding protein during the formation of the second commitment complex
YPL249C-A	841.94	-0.0459767	0.270137	0.992604	841.94	0.102146	0.370564	0.999906	841.94	-0.148123	0.458576	0.999827	RPL36B	Protein component of the large (60S) ribosomal subunit, nearly identical to Rpl36Ap and has similarity to rat L36 ribosomal protein; binds to 5.8 S rRNA
YPR035W	508.84	0.0791414	0.321309	0.992604	508.84	-0.0334237	0.430362	0.999906	508.84	0.112565	0.537076	0.999827	GLN1	Glutamine synthetase (GS), synthesizes glutamine from glutamate and ammonia; with Glt1p, forms the secondary pathway for glutamate biosynthesis from ammonia; expression regulated by nitrogen source and by amino acid limitation
YFR037C	230.834	-0.317063	0.310019	0.959028	230.834	-0.368078	0.419655	0.999906	230.834	0.0510153	0.52175	0.999827	RSC8	Component of the RSC chromatin remodeling complex; essential for viability and mitotic growth; homolog of SWI/SNF subunit Swi3p, but unlike Swi3p, does not activate transcription of reporters
YBR154C	112.636	-0.219943	0.342635	0.971062	112.636	-0.327985	0.473641	0.999906	112.636	0.108041	0.584581	0.999827	RPB5	RNA polymerase subunit ABC27, common to RNA polymerases I, II, and III; contacts DNA and affects transactivation
YEL058W	286.709	0.0351114	0.342782	0.992604	286.709	0.14254	0.458134	0.999906	286.709	-0.107429	0.572175	0.999827	PCM1	Essential N-acetylglucosamine-phosphate mutase; converts GlcNAc-6-P to GlcNAc-1-P, which is a precursor for the biosynthesis of chitin and for the formation of N-glycosylated mannoproteins and glycosylphosphatidylinositol anchors
YKL096W-A	1869.1	0.607892	0.288016	0.829774	1869.1	-0.0674187	0.390364	0.999906	1869.1	0.675311	0.485115	0.999827	CWP2	Covalently linked cell wall mannoprotein, major constituent of the cell wall; plays a role in stabilizing the cell wall; involved in low pH resistance; precursor is GPI-anchored
YDR071C	109.448	0.415925	0.375548	0.959028	109.448	-0.295259	0.49981	0.999906	109.448	0.711184	0.625177	0.999827	PAA1	Polyamine acetyltransferase; acetylates polyamines (e.g. putrescine, spermidine, spermine) and also aralkylamines (e.g. tryptamine, phenylethylamine); may be involved in transcription and/or DNA replication
YDR475C	38.7365	-0.493185	0.504711	NA	38.7365	-0.173004	0.59088	0.999906	38.7365	-0.32018	0.777093	0.999827	JIP4	Protein of unknown function; previously annotated as two separate ORFs, YDR474C and YDR475C, which were merged as a result of corrections to the systematic reference sequence
YDL095W	931.431	0.344809	0.262256	0.959028	931.431	0.547721	0.359921	0.999906	931.431	-0.202913	0.445332	0.999827	PMT1	Protein O-mannosyltransferase, transfers mannose from dolichyl phosphate-D-mannose to protein Ser/Thr residues; 1 of 7 related proteins involved in O-glycosylation which is essential for cell wall rigidity; involved in ER quality control
YJR091C	108.343	0.233416	0.391557	0.979138	108.343	0.181771	0.483798	0.999906	108.343	0.0516458	0.622383	0.999827	JSN1	Member of the Puf family of RNA-binding proteins, interacts with mRNAs encoding membrane-associated proteins; involved in localizing the Arp2/3 complex to mitochondria; overexpression causes increased sensitivity to benomyl
YLR259C	1445.79	0.268169	0.262926	0.959028	1445.79	0.103936	0.360947	0.999906	1445.79	0.164233	0.446556	0.999827	HSP60	Tetradecameric mitochondrial chaperonin required for ATP-dependent folding of precursor polypeptides and complex assembly; prevents aggregation and mediates protein refolding after heat shock; role in mtDNA transmission; phosphorylated
YDR372C	155.673	0.0294956	0.32103	0.992604	155.673	0.197527	0.437062	0.999906	155.673	-0.168032	0.542288	0.999827	VPS74	Protein required for Golgi localization of glycosyltransferases; binds the cytosolic domains of Golgi glycosyltransferases; binding to PtdIns4P required for Golgi targeting and function; tetramer formation required for function
YOR058C	53.966	-1.01697	0.466248	NA	53.966	0.0174943	0.561242	0.999906	53.966	-1.03446	0.729662	0.999827	ASE1	Mitotic spindle midzone localized microtubule-associated protein (MAP) family member; required for spindle elongation and stabilization; undergoes cell cycle-regulated degradation by anaphase promoting complex; potential Cdc28p substrate
YDR170C	702.647	0.0679341	0.280043	0.992604	702.647	0.0782471	0.377414	0.999906	702.647	-0.010313	0.469962	0.999827	SEC7	Guanine nucleotide exchange factor (GEF) for ADP ribosylation factors involved in proliferation of the Golgi, intra-Golgi transport and ER-to-Golgi transport; found in the cytoplasm and on Golgi-associated coated vesicles
YER052C	244.76	0.25107	0.304957	0.959028	244.76	0.233136	0.415642	0.999906	244.76	0.0179331	0.515512	0.999827	HOM3	Aspartate kinase (L-aspartate 4-P-transferase); cytoplasmic enzyme that catalyzes the first step in the common pathway for methionine and threonine biosynthesis; expression regulated by Gcn4p and the general control of amino acid synthesis
YDR017C	118.438	-0.170169	0.405067	0.992604	118.438	-0.468226	0.509736	0.999906	118.438	0.298056	0.651085	0.999827	KCS1	Inositol hexakisphosphate (IP6) and inositol heptakisphosphate (IP7) kinase; generation of high energy inositol pyrophosphates by Kcs1p is required for many processes such as vacuolar biogenesis, stress response and telomere maintenance
YOL034W	46.612	-0.0700634	0.455237	NA	46.612	0.00609487	0.535312	0.999906	46.612	-0.0761583	0.702697	0.999827	SMC5	Structural maintenance of chromosomes (SMC) protein; essential subunit of the Mms21-Smc5-Smc6 complex; required for growth and DNA repair; S. pombe homolog forms a heterodimer with S. pombe Rad18p that is involved in DNA repair
YLR287C-A	382.529	0.309439	0.303287	0.959028	382.529	-0.0403325	0.4089	0.999906	382.529	0.349772	0.509099	0.999827	RPS30A	Protein component of the small (40S) ribosomal subunit; nearly identical to Rps30Bp and has similarity to rat S30 ribosomal protein
YBR132C	56.6423	-0.0576044	0.442049	NA	56.6423	-0.212371	0.549491	0.999906	56.6423	0.154767	0.705225	0.999827	AGP2	High affinity polyamine permease, preferentially uses spermidine over putrescine; expression is down-regulated by osmotic stress; plasma membrane carnitine transporter, also functions as a low-affinity amino acid permease
YBR011C	1279.08	0.242056	0.258197	0.959028	1279.08	0.136207	0.356185	0.999906	1279.08	0.105849	0.439924	0.999827	IPP1	Cytoplasmic inorganic pyrophosphatase (PPase), homodimer that catalyzes the rapid exchange of oxygens from Pi with water, highly expressed and essential for viability, active-site residues show identity to those from E. coli PPase
YFR015C	227.519	-0.223707	0.608334	0.992604	227.519	-0.0345679	0.64615	0.999906	227.519	-0.189139	0.887456	0.999827	GSY1	Glycogen synthase with similarity to Gsy2p, the more highly expressed yeast homolog; expression induced by glucose limitation, nitrogen starvation, environmental stress, and entry into stationary phase
YPL158C	47.2783	-0.672506	0.551709	NA	47.2783	-0.366575	0.626011	0.999906	47.2783	-0.30593	0.834428	0.999827	AIM44	Protein of unknown function; GFP-fusion protein localizes to the bud neck; transcription is regulated by Swi5p; null mutant displays elevated frequency of mitochondrial genome loss
YNL273W	47.8808	0.0963015	0.453469	NA	47.8808	0.159554	0.535395	0.999906	47.8808	-0.0632528	0.701602	0.999827	TOF1	Subunit of a replication-pausing checkpoint complex (Tof1p-Mrc1p-Csm3p) that acts at the stalled replication fork to promote sister chromatid cohesion after DNA damage, facilitating gap repair of damaged DNA; interacts with the MCM helicase
YNL071W	503.569	0.255549	0.315516	0.959028	503.569	0.325676	0.425936	0.999906	503.569	-0.0701266	0.530066	0.999827	LAT1	Dihydrolipoamide acetyltransferase component (E2) of pyruvate dehydrogenase complex, which catalyzes the oxidative decarboxylation of pyruvate to acetyl-CoA
YKR018C	317.373	0.130573	0.286937	0.992604	317.373	0.265021	0.400546	0.999906	317.373	-0.134449	0.492714	0.999827		Putative protein of unknown function; green fluorescent protein (GFP)-fusion protein localizes to the cytoplasm and nucleus
YNL116W	35.4901	-0.536382	0.486045	NA	35.4901	0.324382	0.579422	0.999906	35.4901	-0.860764	0.756293	0.999827	DMA2	Protein involved in ubiquitination; plays a role in regulating spindle position and orientation; functionally redundant with Dma1p; orthologous to human RNF8 protein, also has sequence similarity to human Chfr
YMR258C	46.1124	-0.518866	0.462178	NA	46.1124	0.221686	0.56464	0.999906	46.1124	-0.740552	0.72968	0.999827		Protein of unknown function with similarity to F-box proteins; physically interacts with Skp1p; green fluorescent protein (GFP)-fusion protein localizes to the cytoplasm and nucleus; YMR258C is not an essential gene
YGL197W	134.064	-0.203803	0.366843	0.982129	134.064	0.182665	0.464472	0.999906	134.064	-0.386469	0.591865	0.999827	MDS3	Putative component of the TOR regulatory pathway; negative regulator of early meiotic gene expression; required, with Pmd1p, for growth under alkaline conditions; has an N-terminal kelch-like domain
YFR051C	376.974	0.193541	0.299721	0.970619	376.974	0.248383	0.41284	0.999906	376.974	-0.0548417	0.510164	0.999827	RET2	Delta subunit of the coatomer complex (COPI), which coats Golgi-derived transport vesicles; involved in retrograde transport between Golgi and ER
YLR295C	134.897	-0.463575	0.347993	0.959028	134.897	0.675393	0.470512	0.999906	134.897	-1.13897	0.585218	0.999827	ATP14	Subunit h of the F0 sector of mitochondrial F1F0 ATP synthase, which is a large, evolutionarily conserved enzyme complex required for ATP synthesis
YBR055C	47.8712	-0.0273227	0.443288	NA	47.8712	0.132821	0.54886	0.999906	47.8712	-0.160144	0.705499	0.999827	PRP6	Splicing factor, component of the U4/U6-U5 snRNP complex
YJL112W	50.2366	0.329417	0.443742	NA	50.2366	0.463639	0.54045	0.999906	50.2366	-0.134222	0.699208	0.999827	MDV1	Peripheral protein of the cytosolic face of the mitochondrial outer membrane, required for mitochondrial fission; interacts with Fis1p and with the dynamin-related GTPase Dnm1p; contains WD repeats
YIL076W	131.971	0.322164	0.3853	0.959028	131.971	0.234139	0.495333	0.999906	131.971	0.0880248	0.627535	0.999827	SEC28	Epsilon-COP subunit of the coatomer; regulates retrograde Golgi-to-ER protein traffic; stabilizes Cop1p, the alpha-COP and the coatomer complex; non-essential for cell growth
YCR023C	36.9991	0.195154	0.505677	NA	36.9991	0.137007	0.58566	0.999906	36.9991	0.0581471	0.773726	0.999827		Vacuolar membrane protein of unknown function; member of the multidrug resistance family; YCR023C is not an essential gene
YDR006C	72.1854	0.124441	0.400913	0.992604	72.1854	-0.0725372	0.492507	0.999906	72.1854	0.196978	0.635048	0.999827	SOK1	Protein whose overexpression suppresses the growth defect of mutants lacking protein kinase A activity; involved in cAMP-mediated signaling; localized to the nucleus; similar to the mouse testis-specific protein PBS13
YBR088C	174.307	0.369801	0.466094	0.959028	174.307	0.406451	0.575497	0.999906	174.307	-0.0366505	0.740564	0.999827	POL30	Proliferating cell nuclear antigen (PCNA), functions as the sliding clamp for DNA polymerase delta; may function as a docking site for other proteins required for mitotic and meiotic chromosomal DNA replication and for DNA repair
YGR027C	1157.36	0.0420531	0.251967	0.992604	1157.36	0.187213	0.347567	0.999906	1157.36	-0.14516	0.42929	0.999827	RPS25A	Protein component of the small (40S) ribosomal subunit; nearly identical to Rps25Bp and has similarity to rat S25 ribosomal protein
YKL146W	104.924	-0.22368	0.346286	0.970619	104.924	0.232891	0.462701	0.999906	104.924	-0.456571	0.577927	0.999827	AVT3	Vacuolar transporter, exports large neutral amino acids from the vacuole; member of a family of seven S. cerevisiae genes (AVT1-7) related to vesicular GABA-glycine transporters
YDR341C	909.301	0.223102	0.272635	0.959028	909.301	-0.0946578	0.373708	0.999906	909.301	0.31776	0.462588	0.999827		Arginyl-tRNA synthetase, proposed to be cytoplasmic but the authentic, non-tagged protein is detected in highly purified mitochondria in high-throughput studies
YJR109C	787.082	1.02592	0.290628	0.0906252	787.082	1.03989	0.396652	0.999906	787.082	-0.0139698	0.491724	0.999827	CPA2	Large subunit of carbamoyl phosphate synthetase, which catalyzes a step in the synthesis of citrulline, an arginine precursor
YBR101C	84.0501	0.113737	0.35908	0.992604	84.0501	0.00314206	0.473236	0.999906	84.0501	0.110595	0.594039	0.999827	FES1	Hsp70 (Ssa1p) nucleotide exchange factor, cytosolic homolog of Sil1p, which is the nucleotide exchange factor for BiP (Kar2p) in the endoplasmic reticulum
YHR082C	233.188	0.588509	0.31108	0.911569	233.188	0.178069	0.404465	0.999906	233.188	0.41044	0.510251	0.999827	KSP1	Ser/thr protein kinase; nuclear translocation required for haploid filamentous growth; regulates filamentous growth induced nuclear translocation of Bcy1p, Fus3p, and Sks1p; overproduction causes allele-specific suppression of prp20-10
YNL262W	254.16	0.446028	0.319848	0.959028	254.16	0.219506	0.424402	0.999906	254.16	0.226522	0.531428	0.999827	POL2	Catalytic subunit of DNA polymerase (II) epsilon, a chromosomal DNA replication polymerase that exhibits processivity and proofreading exonuclease activity; also involved in DNA synthesis during DNA repair; interacts extensively with Mrc1p
YPR204W	31.0833	0.243516	0.567464	NA	31.0833	0.112165	0.600453	0.999906	31.0833	0.131351	0.826116	0.999827		Helicase-like protein encoded within the telomeric Y' element
YPR143W	55.9731	-0.475985	0.40936	NA	55.9731	-0.760605	0.526366	0.999906	55.9731	0.28462	0.66681	0.999827	RRP15	Nucleolar protein, constituent of pre-60S ribosomal particles; required for proper processing of the 27S pre-rRNA at the A3 and B1 sites to yield mature 5.8S and 25S rRNAs
YNL161W	88.8426	-0.403752	0.375722	0.959028	88.8426	0.0814321	0.482665	0.999906	88.8426	-0.485184	0.611663	0.999827	CBK1	Serine/threonine protein kinase that regulates cell morphogenesis pathways; involved in cell wall biosynthesis, apical growth, proper mating projection morphology, bipolar bud site selection in diploid cells, and cell separation
YBL050W	124.672	-0.0817383	0.339452	0.992604	124.672	0.550189	0.469227	0.999906	124.672	-0.631928	0.579124	0.999827	SEC17	Peripheral membrane protein required for vesicular transport between ER and Golgi, the 'priming' step in homotypic vacuole fusion, and autophagy; stimulates the ATPase activity of Sec18p; has similarity to mammalian alpha-SNAP
YCR067C	137.367	0.332895	0.345797	0.959028	137.367	0.647436	0.454005	0.999906	137.367	-0.314541	0.570673	0.999827	SED4	Integral endoplasmic reticulum membrane protein, functions as a positive regulator of Sar1p probably through inhibition of GTPase activation by Sec23p; binds Sec16p, participates in vesicle formation, similar to Sec12p
YLR199C	50.5227	0.806846	0.465699	NA	50.5227	0.0992529	0.569122	0.999906	50.5227	0.707593	0.735346	0.999827	PBA1	Protein involved in 20S proteasome assembly; forms a heterodimer with Add66p that binds to proteasome precursors; similar to human PAC1 constituent of the PAC1-PAC2 complex involved in proteasome assembly
YLL026W	1260.56	0.37784	0.323786	0.959028	1260.56	0.484949	0.431666	0.999906	1260.56	-0.107109	0.539604	0.999827	HSP104	Heat shock protein that cooperates with Ydj1p (Hsp40) and Ssa1p (Hsp70) to refold and reactivate previously denatured, aggregated proteins; responsive to stresses including: heat, ethanol, and sodium arsenite; involved in
YNL327W	96.1215	-0.146196	0.490519	0.992604	96.1215	0.0211594	0.582057	0.999906	96.1215	-0.167356	0.761179	0.999827	EGT2	Glycosylphosphatidylinositol (GPI)-anchored cell wall endoglucanase required for proper cell separation after cytokinesis, expression is activated by Swi5p and tightly regulated in a cell cycle-dependent manner
YGR261C	136.941	0.161672	0.337296	0.992604	136.941	-0.0359886	0.440618	0.999906	136.941	0.197661	0.554894	0.999827	APL6	Beta3-like subunit of the yeast AP-3 complex; functions in transport of alkaline phosphatase to the vacuole via the alternate pathway; exists in both cytosolic and peripherally associated membrane-bound pools
YDR143C	86.9481	0.208323	0.404513	0.987757	86.9481	0.0379133	0.502542	0.999906	86.9481	0.170409	0.645112	0.999827	SAN1	Ubiquitin-protein ligase, involved in the proteasome-dependent degradation of aberrant nuclear proteins; contains intrinsically disordered regions that contribute to substrate recognition
YJL222W	100.265	-0.486114	0.375798	0.959028	100.265	-0.0159194	0.468201	0.999906	100.265	-0.470194	0.600364	0.999827	VTH2	Putative membrane glycoprotein with strong similarity to Vth1p and Pep1p/Vps10p, may be involved in vacuolar protein sorting
YIL144W	43.3813	-0.482751	0.453147	NA	43.3813	-0.510893	0.554141	0.999906	43.3813	0.0281414	0.715831	0.999827	TID3	Component of the evolutionarily conserved kinetochore-associated Ndc80 complex (Ndc80p-Nuf2p-Spc24p-Spc25p); conserved coiled-coil protein involved in chromosome segregation, spindle checkpoint activity, kinetochore assembly and clustering
YDL185W	3247.49	0.274612	0.242914	0.959028	3247.49	0.183855	0.333355	0.999906	3247.49	0.0907571	0.412471	0.999827	VMA1	Subunit A of the eight-subunit V1 peripheral membrane domain of the vacuolar H+-ATPase; protein precursor undergoes self-catalyzed splicing to yield the extein Tfp1p and the intein Vde (PI-SceI), which is a site-specific endonuclease
YDL084W	684.982	0.194912	0.319017	0.979138	684.982	0.099046	0.424636	0.999906	684.982	0.0958662	0.531119	0.999827	SUB2	Component of the TREX complex required for nuclear mRNA export; member of the DEAD-box RNA helicase superfamily and is involved in early and late steps of spliceosome assembly; homolog of the human splicing factor hUAP56
YER043C	2243.31	-0.0174303	0.259733	0.992952	2243.31	0.0514007	0.355962	0.999906	2243.31	-0.068831	0.440647	0.999827	SAH1	S-adenosyl-L-homocysteine hydrolase, catabolizes S-adenosyl-L-homocysteine which is formed after donation of the activated methyl group of S-adenosyl-L-methionine (AdoMet) to an acceptor
YMR285C	61.5633	-0.683759	0.405414	NA	61.5633	0.21836	0.518727	0.999906	61.5633	-0.902119	0.658371	0.999827	NGL2	Protein involved in 5.8S rRNA processing; Ccr4p-like RNase required for correct 3'-end formation of 5.8S rRNA at site E; similar to Ngl1p and Ngl3p
YBR123C	47.3413	-0.777309	0.430937	NA	47.3413	-0.437147	0.541511	0.999906	47.3413	-0.340162	0.692049	0.999827	TFC1	One of six subunits of the RNA polymerase III transcription initiation factor complex (TFIIIC); part of the TauA globular domain of TFIIIC that binds DNA at the BoxA promoter sites of tRNA and similar genes; human homolog is TFIIIC-63
YLL004W	43.0804	0.371487	0.462431	NA	43.0804	-0.197989	0.560683	0.999906	43.0804	0.569476	0.726773	0.999827	ORC3	Subunit of the origin recognition complex, which directs DNA replication by binding to replication origins and is also involved in transcriptional silencing
YML027W	48.3709	-0.179105	0.477964	NA	48.3709	0.336321	0.572597	0.999906	48.3709	-0.515427	0.745857	0.999827	YOX1	Homeodomain-containing transcriptional repressor, binds to Mcm1p and to early cell cycle boxes (ECBs) in the promoters of cell cycle-regulated genes expressed in M/G1 phase; expression is cell cycle-regulated; potential Cdc28p substrate
YPR024W	141.503	-0.0285427	0.334417	0.992604	141.503	-0.0827075	0.441028	0.999906	141.503	0.0541649	0.553478	0.999827	YME1	Catalytic subunit of the mitochondrial inner membrane i-AAA protease complex, which is responsible for degradation of unfolded or misfolded mitochondrial gene products; mutation causes an elevated rate of mitochondrial turnover
YPR125W	62.4967	-0.108844	0.400887	NA	62.4967	-0.360457	0.503084	0.999906	62.4967	0.251612	0.643278	0.999827	YLH47	Mitochondrial inner membrane protein exposed to the mitochondrial matrix, associates with mitochondrial ribosomes, NOT required for respiratory growth; homolog of human Letm1, a protein implicated in Wolf-Hirschhorn syndrome
YHR028C	127.399	0.0604008	0.348512	0.992604	127.399	0.666014	0.464203	0.999906	127.399	-0.605613	0.580453	0.999827	DAP2	Dipeptidyl aminopeptidase, synthesized as a glycosylated precursor; localizes to the vacuolar membrane; similar to Ste13p
YOL061W	211.367	0.223439	0.314866	0.967178	211.367	0.25737	0.424491	0.999906	211.367	-0.0339308	0.528515	0.999827	PRS5	5-phospho-ribosyl-1(alpha)-pyrophosphate synthetase, synthesizes PRPP, which is required for nucleotide, histidine, and tryptophan biosynthesis; one of five related enzymes, which are active as heteromultimeric complexes
YGR005C	108.248	-0.541132	0.37609	0.959028	108.248	-0.423364	0.499985	0.999906	108.248	-0.117768	0.625642	0.999827	TFG2	TFIIF (Transcription Factor II) middle subunit; involved in both transcription initiation and elongation of RNA polymerase II; homologous to human RAP30
YML063W	3350.71	-0.0508577	0.238071	0.992604	3350.71	0.0896171	0.326603	0.999906	3350.71	-0.140475	0.404162	0.999827	RPS1B	Ribosomal protein 10 (rp10) of the small (40S) subunit; nearly identical to Rps1Ap and has similarity to rat S3a ribosomal protein
YKR081C	145.08	-0.234438	0.336092	0.967178	145.08	-0.0361358	0.455262	0.999906	145.08	-0.198302	0.56588	0.999827	RPF2	Essential protein involved in the processing of pre-rRNA and the assembly of the 60S ribosomal subunit; interacts with ribosomal protein L11; localizes predominantly to the nucleolus; constituent of 66S pre-ribosomal particles
YDL019C	160.568	0.127871	0.35458	0.992604	160.568	0.0996646	0.465752	0.999906	160.568	0.0282067	0.585359	0.999827	OSH2	Member of an oxysterol-binding protein family with seven members in S. cerevisiae; family members have overlapping, redundant functions in sterol metabolism and collectively perform a function essential for viability
YDR398W	142.232	-0.309922	0.367506	0.959028	142.232	-0.175335	0.475591	0.999906	142.232	-0.134587	0.601039	0.999827	UTP5	Subunit of U3-containing Small Subunit (SSU) processome complex involved in production of 18S rRNA and assembly of small ribosomal subunit
YKL135C	91.155	-0.357902	0.376301	0.959028	91.155	-0.447888	0.477988	0.999906	91.155	0.0899858	0.608339	0.999827	APL2	Beta-adaptin, large subunit of the clathrin-associated protein (AP-1) complex; binds clathrin; involved in clathrin-dependent Golgi protein sorting
YPR112C	233.192	-0.760857	0.317688	0.735749	233.192	-0.354437	0.42662	0.999906	233.192	-0.40642	0.531912	0.999827	MRD1	Essential conserved protein that is part of the 90S preribosome; required for production of 18S rRNA and small ribosomal subunit; contains five consensus RNA-binding domains
YDR156W	57.065	-0.355415	0.416184	NA	57.065	0.0248288	0.535906	0.999906	57.065	-0.380243	0.678528	0.999827	RPA14	RNA polymerase I subunit A14
YER157W	52.9162	0.0629956	0.447474	NA	52.9162	0.124598	0.541113	0.999906	52.9162	-0.061602	0.702146	0.999827	COG3	Essential component of the conserved oligomeric Golgi complex (Cog1p through Cog8p), a cytosolic tethering complex that functions in protein trafficking to mediate fusion of transport vesicles to Golgi compartments
YGR155W	1579.42	-0.0453151	0.243156	0.992604	1579.42	0.0273632	0.335904	0.999906	1579.42	-0.0726783	0.414676	0.999827	CYS4	Cystathionine beta-synthase, catalyzes synthesis of cystathionine from serine and homocysteine, the first committed step in cysteine biosynthesis; responsible for hydrogen sulfide generation; mutations in human ortholog cause homocystinuria
YKL016C	158.265	-0.0143861	0.39212	0.996189	158.265	-0.184702	0.515515	0.999906	158.265	0.170316	0.647698	0.999827	ATP7	Subunit d of the stator stalk of mitochondrial F1F0 ATP synthase, which is a large, evolutionarily conserved enzyme complex required for ATP synthesis
YBR235W	79.3204	-0.0378786	0.382885	0.992604	79.3204	-0.0535618	0.488663	0.999906	79.3204	0.0156832	0.620794	0.999827		Putative ion transporter, similar to mammalian electroneutral Na(+)-(K+)-C1- cotransporter family; YBR235W is not an essential gene
YIL137C	277.905	0.139085	0.282531	0.992604	277.905	0.13919	0.391004	0.999906	277.905	-0.00010448	0.482395	0.999827	TMA108	Protein that associates with ribosomes and is involved in ribosome biogenesis; putative metalloprotease
YER030W	90.7377	-0.347892	0.399608	0.959028	90.7377	1.04817	0.534967	0.999906	90.7377	-1.39606	0.667731	0.999827	CHZ1	Histone chaperone for Htz1p/H2A-H2B dimer; required for the stabilization of the Chz1p-Htz1-H2B complex; has overlapping function with Nap1p; null mutant displays weak sensitivity to MMS and benomyl; contains a highly conserved CHZ motif
YLR318W	23.4073	-0.719418	0.576883	NA	23.4073	0.109409	0.612542	0.999906	23.4073	-0.828827	0.841448	0.999827	EST2	Reverse transcriptase subunit of the telomerase holoenzyme, essential for telomerase core catalytic activity, involved in other aspects of telomerase assembly and function; mutations in human homolog are associated with aplastic anemia
YCR036W	94.281	-0.131968	0.353128	0.992604	94.281	-0.922297	0.485338	0.999906	94.281	0.79033	0.600224	0.999827	RBK1	Putative ribokinase
YPR156C	468.649	0.0693348	0.326819	0.992604	468.649	-0.510841	0.436789	0.999906	468.649	0.580176	0.545524	0.999827	TPO3	Polyamine transport protein specific for spermine; localizes to the plasma membrane; member of the major facilitator superfamily
YDR354W	75.0696	-0.0889149	0.39375	0.992604	75.0696	-0.12498	0.504972	0.999906	75.0696	0.0360651	0.640336	0.999827	TRP4	Anthranilate phosphoribosyl transferase of the tryptophan biosynthetic pathway, catalyzes the phosphoribosylation of anthranilate, subject to the general control system of amino acid biosynthesis
YPL091W	515.806	0.32006	0.27122	0.959028	515.806	0.376991	0.380075	0.999906	515.806	-0.0569317	0.466921	0.999827	GLR1	Cytosolic and mitochondrial glutathione oxidoreductase, converts oxidized glutathione to reduced glutathione; mitochondrial but not cytosolic form has a role in resistance to hyperoxia
YPR075C	98.1578	-0.22666	0.375313	0.979138	98.1578	0.0266221	0.481895	0.999906	98.1578	-0.253283	0.610802	0.999827	OPY2	Integral membrane protein that functions in the signaling branch of the high-osmolarity glycerol (HOG) pathway; interacts with Ste50p; overproduction blocks cell cycle arrest in the presence of mating pheromone
YGR032W	270.506	0.301022	0.365232	0.959028	270.506	0.171625	0.481845	0.999906	270.506	0.129397	0.604621	0.999827	GSC2	Catalytic subunit of 1,3-beta-glucan synthase, involved in formation of the inner layer of the spore wall; activity positively regulated by Rho1p and negatively by Smk1p; has similarity to an alternate catalytic subunit, Fks1p (Gsc1p)
YNL255C	493.658	-0.526876	0.35774	0.959028	493.658	-0.0466871	0.470224	0.999906	493.658	-0.480189	0.590837	0.999827	GIS2	RNA binding protein that binds to mRNAs coding for RNA processing factors, chromatin modifiers and GTPases; has sequence and functional similarity to CNBP, a gene involved in myotonic dystrophy type 2; contains seven CCHC zinc-finger motifs
YBR114W	40.5627	-0.161586	0.471378	NA	40.5627	-0.306784	0.573557	0.999906	40.5627	0.145199	0.742406	0.999827	RAD16	Protein that recognizes and binds damaged DNA in an ATP-dependent manner (with Rad7p) during nucleotide excision repair; subunit of Nucleotide Excision Repair Factor 4 (NEF4) and the Elongin-Cullin-Socs (ECS) ligase complex
YBR271W	43.3155	-0.127723	0.447266	NA	43.3155	-0.0664043	0.554955	0.999906	43.3155	-0.061319	0.71275	0.999827		Putative S-adenosylmethionine-dependent methyltransferase of the seven beta-strand family; green fluorescent protein (GFP)-fusion protein localizes to the cytoplasm; predicted to be involved in ribosome biogenesis
YKL052C	55.6257	-0.524591	0.416233	NA	55.6257	-0.194916	0.518934	0.999906	55.6257	-0.329675	0.665239	0.999827	ASK1	Essential subunit of the Dam1 complex (aka DASH complex), couples kinetochores to the force produced by MT depolymerization thereby aiding in chromosome segregation; phosphorylated during the cell cycle by cyclin-dependent kinases
YOR191W	81.5637	-0.399626	0.418365	0.959028	81.5637	-0.100486	0.51073	0.999906	81.5637	-0.299141	0.660208	0.999827	ULS1	RING finger protein involved in proteolytic control of sumoylated substrates; interacts with SUMO (Smt3p); member of the SWI/SNF family of DNA-dependent ATPases; plays a role in antagonizing silencing during mating-type switching
YBR073W	123.251	-0.0964227	0.36293	0.992604	123.251	0.100068	0.466648	0.999906	123.251	-0.196491	0.591165	0.999827	RDH54	DNA-dependent ATPase, stimulates strand exchange by modifying the topology of double-stranded DNA; involved in recombinational repair of DNA double-strand breaks during mitosis and meiosis; proposed to be involved in crossover interference
YHR196W	149.774	-0.323079	0.351174	0.959028	149.774	-0.0228262	0.459572	0.999906	149.774	-0.300252	0.578385	0.999827	UTP9	Nucleolar protein, component of the small subunit (SSU) processome containing the U3 snoRNA that is involved in processing of pre-18S rRNA
YGR199W	83.7697	0.030636	0.397523	0.992604	83.7697	-0.126936	0.517406	0.999906	83.7697	0.157572	0.652478	0.999827	PMT6	Protein O-mannosyltransferase, transfers mannose from dolichyl phosphate-D-mannose to protein serine/threonine residues of secretory proteins; reaction is essential for cell wall rigidity; member of a family of mannosyltransferases
YDR299W	132.111	-0.568953	0.37307	0.959028	132.111	-0.47528	0.485841	0.999906	132.111	-0.0936738	0.612554	0.999827	BFR2	Essential protein that is a component of 90S preribosomes; may be involved in rRNA processing; multicopy suppressor of sensitivity to Brefeldin A; expression is induced during lag phase and also by cold shock
YPL118W	61.9788	0.117296	0.440256	NA	61.9788	0.604068	0.559976	0.999906	61.9788	-0.486773	0.712275	0.999827	MRP51	Mitochondrial ribosomal protein of the small subunit; MRP51 exhibits genetic interactions with mutations in the COX2 and COX3 mRNA 5'-untranslated leader sequences
YJR059W	130.754	0.0577425	0.406229	0.992604	130.754	-0.17791	0.519761	0.999906	130.754	0.235652	0.659675	0.999827	PTK2	Putative serine/threonine protein kinase involved in regulation of ion transport across plasma membrane; enhances spermine uptake
YNL031C	1137.11	0.224031	0.290128	0.961651	1137.11	-0.285071	0.391787	0.999906	1137.11	0.509102	0.487515	0.999827	HHT2	Histone H3, core histone protein required for chromatin assembly, part of heterochromatin-mediated telomeric and HM silencing; one of two identical histone H3 proteins (see HHT1); regulated by acetylation, methylation, and phosphorylation
YER131W	729.603	-0.163733	0.267907	0.979138	729.603	0.137409	0.366923	0.999906	729.603	-0.301141	0.45432	0.999827	RPS26B	Protein component of the small (40S) ribosomal subunit; nearly identical to Rps26Ap and has similarity to rat S26 ribosomal protein
YLR219W	84.8085	0.00011911	0.382199	1	84.8085	0.0085159	0.486337	0.999906	84.8085	-0.00839679	0.618541	0.999827	MSC3	Protein of unknown function, green fluorescent protein (GFP)-fusion protein localizes to the cell periphery; msc3 mutants are defective in directing meiotic recombination events to homologous chromatids; potential Cdc28p substrate
YIL151C	63.8007	-0.466076	0.449174	NA	63.8007	-0.238947	0.533358	0.999906	63.8007	-0.22713	0.697301	0.999827		Putative protein of unknown function, predicted to contain a PINc domain
YOR018W	39.416	0.172927	0.491774	NA	39.416	0.0510378	0.569696	0.999906	39.416	0.121889	0.752556	0.999827	ROD1	Membrane protein that binds the ubiquitin ligase Rsp5p via its 2 PY motifs; overexpression confers resistance to the GST substrate o-dinitrobenzene,zinc, and calcium; proposed to regulate the endocytosis of plasma membrane proteins
YMR139W	40.4237	0.456063	0.454105	NA	40.4237	0.422366	0.566465	0.999906	40.4237	0.0336966	0.725891	0.999827	RIM11	Protein kinase required for signal transduction during entry into meiosis; promotes the formation of the Ime1p-Ume6p complex by phosphorylating Ime1p and Ume6p; shares similarity with mammalian glycogen synthase kinase 3-beta
YER012W	105.683	0.348989	0.382388	0.959028	105.683	0.0142463	0.503138	0.999906	105.683	0.334743	0.631943	0.999827	PRE1	Beta 4 subunit of the 20S proteasome; localizes to the nucleus throughout the cell cycle
YLR138W	193.377	-0.233837	0.33412	0.967178	193.377	0.06524	0.436954	0.999906	193.377	-0.299077	0.550058	0.999827	NHA1	Na+/H+ antiporter involved in sodium and potassium efflux through the plasma membrane; required for alkali cation tolerance at acidic pH
YDR211W	294.186	-0.0117686	0.280594	0.995057	294.186	-0.020612	0.381608	0.999906	294.186	0.00884335	0.473663	0.999827	GCD6	Catalytic epsilon subunit of the translation initiation factor eIF2B, the guanine-nucleotide exchange factor for eIF2; activity subsequently regulated by phosphorylated eIF2; first identified as a negative regulator of GCN4 expression
YJL035C	45.6521	1.26057	0.460122	NA	45.6521	0.395215	0.558266	0.999906	45.6521	0.865355	0.723334	0.999827	TAD2	Subunit of tRNA-specific adenosine-34 deaminase, forms a heterodimer with Tad3p that converts adenosine to inosine at the wobble position of several tRNAs
YML076C	34.55	1.00533	0.51958	NA	34.55	-0.275542	0.581372	0.999906	34.55	1.28087	0.779714	0.999827	WAR1	Homodimeric Zn2Cys6 zinc finger transcription factor; binds to a weak acid response element to induce transcription of PDR12 and FUN34, encoding an acid transporter and a putative ammonia transporter, respectively
YDR376W	51.2286	0.0624995	0.42476	NA	51.2286	0.136892	0.535954	0.999906	51.2286	-0.0743927	0.683835	0.999827	ARH1	Oxidoreductase of the mitochondrial inner membrane, involved in cytoplasmic and mitochondrial iron homeostasis and required for activity of Fe-S cluster-containing enzymes; one of the few mitochondrial proteins essential for viability
YNL156C	47.5343	-0.0769913	0.452752	NA	47.5343	0.226056	0.560398	0.999906	47.5343	-0.303048	0.720416	0.999827	NSG2	Protein involved in regulation of sterol biosynthesis; specifically stabilizes Hmg2p, one of two HMG-CoA isoenzymes that catalyze the rate-limiting step in sterol biosynthesis; homolog of mammalian INSIG proteins
YNL310C	43.5538	-0.245108	0.453645	NA	43.5538	-0.122394	0.559464	0.999906	43.5538	-0.122714	0.720269	0.999827	ZIM17	Heat shock protein with a zinc finger motif; essential for protein import into mitochondria; may act with Pam18p to facilitate recognition and folding of imported proteins by Ssc1p (mtHSP70) in the mitochondrial matrix
YDR174W	158.513	-0.481651	0.393598	0.959028	158.513	-0.0382985	0.50913	0.999906	158.513	-0.443353	0.643532	0.999827	HMO1	Chromatin associated high mobility group (HMG) family member involved in genome maintenance; rDNA-binding component of the Pol I transcription system; associates with a 5'-3' DNA helicase and Fpr1p, a prolyl isomerase
YGR054W	242.276	0.0660663	0.29582	0.992604	242.276	0.154686	0.400209	0.999906	242.276	-0.0886193	0.497669	0.999827		Eukaryotic initiation factor (eIF) 2A; associates specifically with both 40S subunits and 80 S ribosomes, and interacts genetically with both eIF5b and eIF4E; homologous to mammalian eIF2A
YML032C	56.888	-0.162797	0.412161	NA	56.888	0.238759	0.515766	0.999906	56.888	-0.401556	0.660206	0.999827	RAD52	Protein that stimulates strand exchange by facilitating Rad51p binding to single-stranded DNA; anneals complementary single-stranded DNA; involved in the repair of double-strand breaks in DNA during vegetative growth and meiosis
YBR136W	57.9429	0.467162	0.439472	NA	57.9429	-0.208698	0.526567	0.999906	57.9429	0.675859	0.685857	0.999827	MEC1	Genome integrity checkpoint protein and PI kinase superfamily member; signal transducer required for cell cycle arrest and transcriptional responses prompted by damaged or unreplicated DNA; monitors and participates in meiotic recombination
YKR058W	25.7128	-0.0685183	0.611993	NA	25.7128	0.173943	0.644135	0.999906	25.7128	-0.242461	0.888481	0.999827	GLG1	Self-glucosylating initiator of glycogen synthesis, also glucosylates n-dodecyl-beta-D-maltoside; similar to mammalian glycogenin
YDL190C	190.492	0.150242	0.307065	0.992604	190.492	-0.0856604	0.421	0.999906	190.492	0.235902	0.521082	0.999827	UFD2	Ubiquitin chain assembly factor (E4) that cooperates with a ubiquitin-activating enzyme (E1), a ubiquitin-conjugating enzyme (E2), and a ubiquitin protein ligase (E3) to conjugate ubiquitin to substrates; also functions as an E3
YIL115C	284.21	0.195473	0.285628	0.967178	284.21	-0.254219	0.38412	0.999906	284.21	0.449693	0.478677	0.999827	NUP159	Nucleoporin, subunit of the nuclear pore complex that is found exclusively on the cytoplasmic side, member of the Nup82 subcomplex, required for mRNA export
YNR019W	88.1642	0.411319	0.375865	0.959028	88.1642	0.0728779	0.501566	0.999906	88.1642	0.338441	0.626743	0.999827	ARE2	Acyl-CoA:sterol acyltransferase, isozyme of Are1p; endoplasmic reticulum enzyme that contributes the major sterol esterification activity in the presence of oxygen
YPL239W	92.2272	-0.391077	0.390683	0.959028	92.2272	0.182241	0.514944	0.999906	92.2272	-0.573318	0.646374	0.999827	YAR1	Cytoplasmic ankyrin-repeat containing protein of unknown function, proposed to link the processes of 40S ribosomal subunit biogenesis and adaptation to osmotic and oxidative stress; expression repressed by heat shock
YGL038C	95.282	0.141653	0.371565	0.992604	95.282	0.692264	0.480658	0.999906	95.282	-0.550611	0.607496	0.999827	OCH1	Mannosyltransferase of the cis-Golgi apparatus, initiates the polymannose outer chain elongation of N-linked oligosaccharides of glycoproteins
YDR389W	65.4901	-0.326253	0.414322	NA	65.4901	-0.0268833	0.517712	0.999906	65.4901	-0.299369	0.663088	0.999827	SAC7	GTPase activating protein (GAP) for Rho1p, involved in signaling to the actin cytoskeleton, null mutations suppress tor2 mutations and temperature sensitive mutations in actin; potential Cdc28p substrate
YLR381W	30.922	-0.511033	0.514156	NA	30.922	0.182919	0.589202	0.999906	30.922	-0.693953	0.781997	0.999827	CTF3	Outer kinetochore protein that forms a complex with Mcm16p and Mcm22p; may bind the kinetochore to spindle microtubules
YLL022C	88.2026	0.0985183	0.441676	0.992604	88.2026	0.28576	0.553452	0.999906	88.2026	-0.187242	0.70808	0.999827	HIF1	Non-essential component of the HAT-B histone acetyltransferase complex (Hat1p-Hat2p-Hif1p), localized to the nucleus; has a role in telomeric silencing
YNL121C	237.813	0.253508	0.334812	0.962661	237.813	0.171298	0.451846	0.999906	237.813	0.0822099	0.562369	0.999827	TOM70	Component of the TOM (translocase of outer membrane) complex responsible for recognition and initial import steps for all mitochondrially directed proteins; acts as a receptor for incoming precursor proteins
YMR128W	316.217	-0.477931	0.294361	0.959028	316.217	-0.160035	0.399938	0.999906	316.217	-0.317896	0.496587	0.999827	ECM16	Essential DEAH-box ATP-dependent RNA helicase specific to the U3 snoRNP, predominantly nucleolar in distribution, required for 18S rRNA synthesis
YER021W	226.772	0.0559579	0.302214	0.992604	226.772	0.231191	0.41064	0.999906	226.772	-0.175233	0.509858	0.999827	RPN3	Essential, non-ATPase regulatory subunit of the 26S proteasome lid, similar to the p58 subunit of the human 26S proteasome; temperature-sensitive alleles cause metaphase arrest, suggesting a role for the proteasome in cell cycle control
YER120W	367.929	-0.0179469	0.306568	0.992952	367.929	-0.337972	0.420181	0.999906	367.929	0.320025	0.520131	0.999827	SCS2	Integral ER membrane protein that regulates phospholipid metabolism via an interaction with the FFAT motif of Opi1p, also involved in telomeric silencing, disruption causes inositol auxotrophy above 34 degrees C, VAP homolog
YLR208W	359.191	-0.0297829	0.275985	0.992604	359.191	0.0944117	0.379994	0.999906	359.191	-0.124195	0.469641	0.999827	SEC13	Component of both the Nup84 nuclear pore sub-complex and the Sec13p-Sec31p complex of the COPII vesicle coat, required for vesicle formation in ER to Golgi transport and nuclear pore complex organization
YDR301W	81.5571	-0.404542	0.393886	0.959028	81.5571	-0.44375	0.497564	0.999906	81.5571	0.0392072	0.634599	0.999827	CFT1	RNA-binding subunit of the mRNA cleavage and polyadenylation factor; involved in poly(A) site recognition and required for both pre-mRNA cleavage and polyadenylation, 51% sequence similarity with mammalian AAUAA-binding subunit of CPSF
YEL009C	292.792	0.119388	0.388702	0.992604	292.792	-0.154373	0.480983	0.999906	292.792	0.273761	0.618412	0.999827	GCN4	Basic leucine zipper (bZIP) transcriptional activator of amino acid biosynthetic genes in response to amino acid starvation; expression is tightly regulated at both the transcriptional and translational levels
YDR002W	621.706	-0.159801	0.281565	0.982129	621.706	-0.0140234	0.386318	0.999906	621.706	-0.145778	0.478038	0.999827	YRB1	Ran GTPase binding protein; involved in nuclear protein import and RNA export, ubiquitin-mediated protein degradation during the cell cycle; shuttles between the nucleus and cytoplasm; is essential; homolog of human RanBP1
YDR244W	50.4544	-0.0203602	0.429475	NA	50.4544	0.127759	0.538814	0.999906	50.4544	-0.148119	0.689013	0.999827	PEX5	Peroxisomal membrane signal receptor for the C-terminal tripeptide signal sequence (PTS1) of peroxisomal matrix proteins, required for peroxisomal matrix protein import; also proposed to have PTS1-receptor independent functions
YNL064C	688.664	0.277108	0.277803	0.959028	688.664	0.0877319	0.378953	0.999906	688.664	0.189376	0.469871	0.999827	YDJ1	Protein chaperone involved in regulation of the HSP90 and HSP70 functions; involved in protein translocation across membranes; member of the DnaJ family
YDR103W	59.5641	-0.440421	0.455546	NA	59.5641	0.170525	0.540945	0.999906	59.5641	-0.610946	0.707207	0.999827	STE5	Pheromone-response scaffold protein that controls the mating decision; binds Ste11p, Ste7p, and Fus3p kinases, forming a MAPK cascade complex that interacts with the plasma membrane and Ste4p-Ste18p; allosteric activator of Fus3p
YOR229W	52.6175	-0.175907	0.428046	NA	52.6175	-0.518102	0.543538	0.999906	52.6175	0.342195	0.691858	0.999827	WTM2	Transcriptional modulator involved in regulation of meiosis, silencing, and expression of RNR genes; involved in response to replication stress; contains WD repeats
YER164W	254.967	0.0805154	0.294657	0.992604	254.967	-0.347741	0.394765	0.999906	254.967	0.428256	0.492608	0.999827	CHD1	Nucleosome remodeling factor that functions in regulation of transcription elongation; contains a chromo domain, a helicase domain and a DNA-binding domain; component of both the SAGA and SLIK complexes
YDR406W	41.772	0.133881	0.51565	NA	41.772	0.0412337	0.600283	0.999906	41.772	0.0926469	0.791337	0.999827	PDR15	Plasma membrane ATP binding cassette (ABC) transporter, multidrug transporter and general stress response factor implicated in cellular detoxification; regulated by Pdr1p, Pdr3p and Pdr8p; promoter contains a PDR responsive element
YHR076W	54.0561	0.183104	0.44741	NA	54.0561	-0.142716	0.559739	0.999906	54.0561	0.325819	0.716568	0.999827	PTC7	Type 2C protein phosphatase (PP2C); alternatively spliced to create two mRNA isoforms; protein from spliced form localizes to the mitochondria while the one from the unspliced form is localized to the nuclear envelope
YHR086W	46.7587	0.171255	0.461065	NA	46.7587	-0.294474	0.549949	0.999906	46.7587	0.465729	0.717653	0.999827	NAM8	RNA binding protein, component of the U1 snRNP protein; mutants are defective in meiotic recombination and in formation of viable spores, involved in the formation of DSBs through meiosis-specific splicing of MER2 pre-mRNA
YPL228W	58.1042	-0.022268	0.437095	NA	58.1042	-0.112078	0.555925	0.999906	58.1042	0.0898097	0.707174	0.999827	CET1	Beta (RNA 5'-triphosphatase) subunit of the mRNA capping enzyme, a heterodimer (the other subunit is CEG1, a guanylyltransferase) involved in adding the 5' cap to mRNA; the mammalian enzyme is a single bifunctional polypeptide
YIL104C	48.968	-0.385083	0.465806	NA	48.968	-0.454178	0.567356	0.999906	48.968	0.0690957	0.734077	0.999827	SHQ1	Chaperone protein required for the assembly of box H/ACA snoRNPs and thus for pre-rRNA processing, forms a complex with Naf1p and interacts with H/ACA snoRNP components Nhp2p and Cbf5p; homology with known Hsp90p cochaperones
YNR008W	112.563	0.352489	0.351378	0.959028	112.563	-0.187713	0.464867	0.999906	112.563	0.540202	0.582721	0.999827	LRO1	Acyltransferase that catalyzes diacylglycerol esterification; one of several acyltransferases that contribute to triglyceride synthesis; putative homolog of human lecithin cholesterol acyltransferase
YPL008W	26.9624	-0.113028	0.550149	NA	26.9624	-0.152466	0.611786	0.999906	26.9624	0.0394377	0.82276	0.999827	CHL1	Probable DNA helicase involved in sister-chromatid cohesion and genome integrity; interacts with ECO1 and CTF18; mutants are defective in silencing, rDNA recombination, aging and the heat shock response; FANCJ-like helicase family member
YGR089W	50.2758	-0.34147	0.463015	NA	50.2758	-0.649143	0.540682	0.999906	50.2758	0.307674	0.711848	0.999827	NNF2	Protein that exhibits physical and genetic interactions with Rpb8p, which is a subunit of RNA polymerases I, II, and III; computational analysis of large-scale protein-protein interaction data suggests a role in chromosome segregation
YNL002C	126.743	-0.741135	0.386915	0.89785	126.743	-0.155964	0.503668	0.999906	126.743	-0.585171	0.635127	0.999827	RLP7	Nucleolar protein with similarity to large ribosomal subunit L7 proteins; constituent of 66S pre-ribosomal particles; plays an essential role in processing of precursors to the large ribosomal subunit RNAs
YMR083W	224.024	0.328275	0.298065	0.959028	224.024	0.167418	0.414384	0.999906	224.024	0.160857	0.510438	0.999827	ADH3	Mitochondrial alcohol dehydrogenase isozyme III; involved in the shuttling of mitochondrial NADH to the cytosol under anaerobic conditions and ethanol production
YBR163W	21.9047	0.213112	0.58718	NA	21.9047	0.0286635	0.628529	0.999906	21.9047	0.184449	0.860082	0.999827	EXO5	Mitochondrial 5'-3' exonuclease and sliding exonuclease, required for mitochondrial genome maintenance; distantly related to the RecB nuclease domain of bacterial RecBCD recombinases; may be regulated by the transcription factor Ace2
YIL063C	73.4839	-0.277816	0.384112	0.967178	73.4839	-0.571517	0.499643	0.999906	73.4839	0.293701	0.630231	0.999827	YRB2	Protein of unknown function involved in nuclear processes of the Ran-GTPase cycle; involved in nuclear protein export; contains Ran Binding Domain and FxFG repeats; interacts with Srm1p, GTP-Gsp1p, Rna1p and Crm1p; is not essential
YHL040C	45.3333	0.593368	0.490855	NA	45.3333	-0.205227	0.582955	0.999906	45.3333	0.798595	0.762079	0.999827	ARN1	Transporter, member of the ARN family of transporters that specifically recognize siderophore-iron chelates; responsible for uptake of iron bound to ferrirubin, ferrirhodin, and related siderophores
YLR129W	316.086	-0.488033	0.383216	0.959028	316.086	-0.0248505	0.493175	0.999906	316.086	-0.463182	0.62456	0.999827	DIP2	Nucleolar protein, specifically associated with the U3 snoRNA, part of the large ribonucleoprotein complex known as the small subunit (SSU) processome, required for 18S rRNA biogenesis, part of the active pre-rRNA processing complex
YNL244C	283.886	-1.02583	0.437733	0.735749	283.886	0.141055	0.553488	0.999906	283.886	-1.16689	0.705663	0.999827	SUI1	Translation initiation factor eIF1; component of a complex involved in recognition of the initiator codon; modulates translation accuracy at the initiation phase
YPL181W	56.4467	0.154594	0.429472	NA	56.4467	-0.244264	0.525401	0.999906	56.4467	0.398858	0.678594	0.999827	CTI6	Protein that relieves transcriptional repression by binding to the Cyc8p-Tup1p corepressor and recruiting the SAGA complex to the repressed promoter; contains a PHD finger domain
YOR108W	198.44	0.465037	0.324348	0.959028	198.44	0.304371	0.424282	0.999906	198.44	0.160666	0.534051	0.999827	LEU9	Alpha-isopropylmalate synthase II (2-isopropylmalate synthase), catalyzes the first step in the leucine biosynthesis pathway; the minor isozyme, responsible for the residual alpha-IPMS activity detected in a leu4 null mutant
YER102W	3359.69	0.256289	0.24616	0.959028	3359.69	-0.0712491	0.336688	0.999906	3359.69	0.327538	0.417078	0.999827	RPS8B	Protein component of the small (40S) ribosomal subunit; identical to Rps8Ap and has similarity to rat S8 ribosomal protein
YGR100W	69.5838	-0.332447	0.414743	0.959028	69.5838	-0.329465	0.517027	0.999906	69.5838	-0.00298145	0.662819	0.999827	MDR1	Cytoplasmic GTPase-activating protein for Ypt/Rab transport GTPases Ypt6p, Ypt31p and Sec4p; involved in recycling of internalized proteins and regulation of Golgi secretory function
YHR010W	668.77	-0.0246718	0.258634	0.992604	668.77	-0.043463	0.352675	0.999906	668.77	0.0187911	0.437345	0.999827	RPL27A	Protein component of the large (60S) ribosomal subunit, nearly identical to Rpl27Bp and has similarity to rat L27 ribosomal protein
YKL025C	47.0025	-0.526214	0.450649	NA	47.0025	-0.294277	0.538263	0.999906	47.0025	-0.231937	0.702005	0.999827	PAN3	Essential subunit of the Pan2p-Pan3p poly(A)-ribonuclease complex, which acts to control poly(A) tail length and regulate the stoichiometry and activity of postreplication repair complexes
YML023C	23.9959	-0.709904	0.594869	NA	23.9959	0.356332	0.641249	0.999906	23.9959	-1.06624	0.874705	0.999827	NSE5	Essential subunit of the Mms21-Smc5-Smc6 complex; required for cell viability and DNA repair
YDR165W	105.427	-0.129592	0.358759	0.992604	105.427	-0.414315	0.47669	0.999906	105.427	0.284723	0.59661	0.999827	TRM82	Subunit of a tRNA methyltransferase complex composed of Trm8p and Trm82p that catalyzes 7-methylguanosine modification of tRNA
YHR169W	59.6886	-0.73404	0.416987	NA	59.6886	-0.413456	0.525422	0.999906	59.6886	-0.320584	0.670778	0.999827	DBP8	ATPase, putative RNA helicase of the DEAD-box family; component of 90S preribosome complex involved in production of 18S rRNA and assembly of 40S small ribosomal subunit; ATPase activity stimulated by association with Esf2p
YOR382W	65.9706	0.653373	0.412834	0.959028	65.9706	-0.552557	0.53957	0.999906	65.9706	1.20593	0.679405	0.999827	FIT2	Mannoprotein that is incorporated into the cell wall via a glycosylphosphatidylinositol (GPI) anchor, involved in the retention of siderophore-iron in the cell wall
YOL021C	207.073	0.102613	0.308727	0.992604	207.073	-0.285308	0.411814	0.999906	207.073	0.38792	0.514688	0.999827	DIS3	Exosome core complex catalytic subunit; possesses both endonuclease and 3'-5' exonuclease activity; involved in 3'-5' RNA processing and degradation in both the nucleus and the cytoplasm; has similarity to E. coli RNase R and to human DIS3
YKR057W	504.381	-0.0351587	0.264549	0.992604	504.381	0.278485	0.366032	0.999906	504.381	-0.313643	0.451625	0.999827	RPS21A	Protein component of the small (40S) ribosomal subunit; nearly identical to Rps21Bp and has similarity to rat S21 ribosomal protein
YOR283W	84.2668	-0.0803567	0.384801	0.992604	84.2668	0.148126	0.504136	0.999906	84.2668	-0.228482	0.634204	0.999827		Phosphatase with a broad substrate specificity and some similarity to GPM1/YKL152C, a phosphoglycerate mutase; YOR283W is not an essential gene
YHR068W	536.324	0.38374	0.302271	0.959028	536.324	0.286287	0.412098	0.999906	536.324	0.0974525	0.511068	0.999827	DYS1	Deoxyhypusine synthase, catalyzes formation of deoxyhypusine, the first step in hypusine biosynthesis; triggers posttranslational hypusination of translation elongation factor eIF-5A and regulates its intracellular levels; tetrameric
YDL080C	30.8428	-0.641235	0.53453	NA	30.8428	0.753208	0.593694	0.999906	30.8428	-1.39444	0.798908	0.999827	THI3	Probable alpha-ketoisocaproate decarboxylase, may have a role in catabolism of amino acids to long-chain and complex alcohols; required for expression of enzymes involved in thiamine biosynthesis
YFR022W	27.5776	-0.149387	0.526151	NA	27.5776	-0.23462	0.589838	0.999906	27.5776	0.0852327	0.790404	0.999827	ROG3	Protein that binds the ubiquitin ligase Rsp5p via its 2 PY motifs; has similarity to Rod1p; mutation suppresses the temperature sensitivity of an mck1 rim11 double mutant; proposed to regulate the endocytosis of plasma membrane proteins
YJL204C	46.0142	-0.555618	0.464509	NA	46.0142	-0.0986181	0.568151	0.999906	46.0142	-0.457	0.733872	0.999827	RCY1	F-box protein involved in recycling plasma membrane proteins internalized by endocytosis; localized to sites of polarized growth
YPR079W	38.0074	0.472436	0.481723	NA	38.0074	-0.104681	0.576408	0.999906	38.0074	0.577117	0.751174	0.999827	MRL1	Membrane protein with similarity to mammalian mannose-6-phosphate receptors, possibly functions as a sorting receptor in the delivery of vacuolar hydrolases
YPL015C	96.374	-0.119791	0.375692	0.992604	96.374	-0.204736	0.48583	0.999906	96.374	0.0849446	0.614144	0.999827	HST2	Cytoplasmic member of the silencing information regulator 2 (Sir2) family of NAD(+)-dependent protein deacetylases; modulates nucleolar (rDNA) and telomeric silencing; possesses NAD(+)-dependent histone deacetylase activity in vitro
YNL178W	3404.31	0.0350381	0.241851	0.992604	3404.31	-0.0172883	0.33189	0.999906	3404.31	0.0523265	0.410662	0.999827	RPS3	Protein component of the small (40S) ribosomal subunit, has apurinic/apyrimidinic (AP) endonuclease activity; essential for viability; has similarity to E. coli S3 and rat S3 ribosomal proteins
YJR077C	479.893	-0.0382779	0.314223	0.992604	479.893	-0.29745	0.428589	0.999906	479.893	0.259172	0.531437	0.999827	MIR1	Mitochondrial phosphate carrier, imports inorganic phosphate into mitochondria; functionally redundant with Pic2p but more abundant than Pic2p under normal conditions; phosphorylated
YDL051W	271.333	-0.148243	0.326558	0.992604	271.333	-0.0406784	0.436261	0.999906	271.333	-0.107565	0.544943	0.999827	LHP1	RNA binding protein required for maturation of tRNA and U6 snRNA precursors; acts as a molecular chaperone for RNAs transcribed by polymerase III; homologous to human La (SS-B) autoantigen
YIL090W	53.8386	-0.238722	0.417882	NA	53.8386	0.282555	0.519415	0.999906	53.8386	-0.521277	0.666633	0.999827	ICE2	Integral ER membrane protein with type-III transmembrane domains; mutations cause defects in cortical ER morphology in both the mother and daughter cells
YOR353C	59.9488	0.119994	0.432866	NA	59.9488	-0.0275869	0.531197	0.999906	59.9488	0.147581	0.685222	0.999827	SOG2	Key component of the RAM signaling network, required for proper cell morphogenesis and cell separation after mitosis
YHR031C	56.7132	-0.18353	0.416959	NA	56.7132	-0.626002	0.526966	0.999906	56.7132	0.442472	0.671981	0.999827	RRM3	DNA helicase involved in rDNA replication and Ty1 transposition; relieves replication fork pauses at telomeric regions; structurally and functionally related to Pif1p
YGL171W	104.647	-0.446518	0.399624	0.959028	104.647	-0.124186	0.508777	0.999906	104.647	-0.322332	0.646957	0.999827	ROK1	ATP-dependent RNA helicase of the DEAD box family; required for 18S rRNA synthesis
YDL029W	322.017	0.437997	0.302576	0.959028	322.017	0.377043	0.421197	0.999906	322.017	0.0609541	0.518605	0.999827	ARP2	Essential component of the Arp2/3 complex, which is a highly conserved actin nucleation center required for the motility and integrity of actin patches; involved in endocytosis and membrane growth and polarity
YMR272C	183.962	0.420952	0.306734	0.959028	183.962	0.33644	0.42235	0.999906	183.962	0.0845125	0.521971	0.999827	SCS7	Sphingolipid alpha-hydroxylase, functions in the alpha-hydroxylation of sphingolipid-associated very long chain fatty acids, has both cytochrome b5-like and hydroxylase/desaturase domains, not essential for growth
YOR115C	41.0648	-0.363307	0.45267	NA	41.0648	0.22914	0.54324	0.999906	41.0648	-0.592447	0.707114	0.999827	TRS33	One of 10 subunits of the transport protein particle (TRAPP) complex of the cis-Golgi which mediates vesicle docking and fusion; involved in endoplasmic reticulum (ER) to Golgi membrane traffic
YER078C	44.156	0.772543	0.459813	NA	44.156	0.385519	0.565474	0.999906	44.156	0.387025	0.728689	0.999827	ICP55	Mitochondrial aminopeptidase; cleaves the N termini of at least 38 imported proteins after cleavage by the mitochondrial processing peptidase (MPP), thereby increasing their stability; member of the aminopeptidase P family
YGL016W	194.749	0.446944	0.309018	0.959028	194.749	0.271343	0.412635	0.999906	194.749	0.175601	0.51551	0.999827	KAP122	Karyopherin beta, responsible for import of the Toa1p-Toa2p complex into the nucleus; binds to nucleoporins Nup1p and Nup2p; may play a role in regulation of pleiotropic drug resistance
YGL135W	3129.55	-0.146497	0.246593	0.979138	3129.55	-0.260613	0.337933	0.999906	3129.55	0.114116	0.418338	0.999827	RPL1B	N-terminally acetylated protein component of the large (60S) ribosomal subunit, nearly identical to Rpl1Ap and has similarity to E. coli L1 and rat L10a ribosomal proteins; rpl1a rpl1b double null mutation is lethal
YLR071C	121.182	0.261814	0.389351	0.967178	121.182	0.239513	0.493303	0.999906	121.182	0.0223012	0.628438	0.999827	RGR1	Subunit of the RNA polymerase II mediator complex; associates with core polymerase subunits to form the RNA polymerase II holoenzyme; required for glucose repression, HO repression, RME1 repression and sporulation
YGR159C	806.824	-0.556749	0.35825	0.959028	806.824	-0.256295	0.468626	0.999906	806.824	-0.300454	0.589876	0.999827	NSR1	Nucleolar protein that binds nuclear localization sequences, required for pre-rRNA processing and ribosome biogenesis
YOR270C	1031.49	0.113961	0.256761	0.992604	1031.49	0.195747	0.351688	0.999906	1031.49	-0.0817858	0.435442	0.999827	VPH1	Subunit a of vacuolar-ATPase V0 domain, one of two isoforms (Vph1p and Stv1p); Vph1p is located in V-ATPase complexes of the vacuole while Stv1p is located in V-ATPase complexes of the Golgi and endosomes
YOR151C	1072.87	0.145361	0.268883	0.986131	1072.87	-0.168232	0.366587	0.999906	1072.87	0.313594	0.454625	0.999827	RPB2	RNA polymerase II second largest subunit B150, part of central core; similar to bacterial beta subunit
YJR033C	75.0361	0.028937	0.382361	0.992604	75.0361	0.427223	0.499749	0.999906	75.0361	-0.398286	0.629218	0.999827	RAV1	Subunit of the RAVE complex (Rav1p, Rav2p, Skp1p), which promotes assembly of the V-ATPase holoenzyme; required for transport between the early and late endosome/PVC and for localization of TGN membrane proteins; potential Cdc28p substrate
YPL217C	382.145	-0.322896	0.308469	0.959028	382.145	0.124113	0.412496	0.999906	382.145	-0.447009	0.515079	0.999827	BMS1	GTPase required for synthesis of 40S ribosomal subunits and for processing the 35S pre-rRNA at sites A0, A1, and A2; interacts with Rcl1p, which stimulates its GTPase and U3 snoRNA binding activities; has similarity to Tsr1p
YLR314C	388.893	0.203323	0.316225	0.970619	388.893	0.0954842	0.423194	0.999906	388.893	0.107839	0.52829	0.999827	CDC3	Component of the septin ring of the mother-bud neck that is required for cytokinesis; septins recruit proteins to the neck and can act as a barrier to diffusion at the membrane, and they comprise the 10nm filaments seen with EM
YDR097C	178.372	0.242045	0.360921	0.967178	178.372	0.381794	0.471445	0.999906	178.372	-0.139748	0.593731	0.999827	MSH6	Protein required for mismatch repair in mitosis and meiosis, forms a complex with Msh2p to repair both single-base & insertion-deletion mispairs; potentially phosphorylated by Cdc28p
YPL037C	390.602	-0.080836	0.282875	0.992604	390.602	-0.184471	0.386683	0.999906	390.602	0.103635	0.479105	0.999827	EGD1	Subunit beta1 of the nascent polypeptide-associated complex (NAC) involved in protein targeting, associated with cytoplasmic ribosomes; enhances DNA binding of the Gal4p activator; homolog of human BTF3b
YDL073W	64.9585	-0.113693	0.403688	NA	64.9585	-0.262544	0.497212	0.999906	64.9585	0.148851	0.640456	0.999827		Putative protein of unknown function; YDL073W is not an essential gene
YKR054C	170.38	-0.195426	0.351454	0.982129	170.38	0.592624	0.447167	0.999906	170.38	-0.788049	0.568747	0.999827	DYN1	Cytoplasmic heavy chain dynein, microtubule motor protein, required for anaphase spindle elongation; involved in spindle assembly, chromosome movement, and spindle orientation during cell division, targeted to microtubule tips by Pac1p
YHR013C	123.586	-0.233687	0.347299	0.967178	123.586	-0.412074	0.466533	0.999906	123.586	0.178387	0.581611	0.999827	ARD1	Subunit of N-terminal acetyltransferase NatA (Nat1p, Ard1p, Nat5p); acetylates many proteins and thus affects telomeric silencing, cell cycle, heat-shock resistance, mating, and sporulation; human Ard1p levels are elevated in cancer cells
YOR216C	60.9969	-0.118487	0.411941	NA	60.9969	0.0476077	0.526169	0.999906	60.9969	-0.166094	0.668235	0.999827	RUD3	Golgi matrix protein involved in the structural organization of the cis-Golgi; interacts genetically with COG3 and USO1
YJL041W	382.421	0.213827	0.308524	0.967178	382.421	0.348284	0.4149	0.999906	382.421	-0.134457	0.517036	0.999827	NSP1	Essential component of the nuclear pore complex, which mediates nuclear import and export, found in both the Nup82 and Nic96 complexes
YMR171C	61.6681	-0.312938	0.415145	NA	61.6681	0.153989	0.512773	0.999906	61.6681	-0.466927	0.659754	0.999827	EAR1	Specificity factor required for Rsp5p-dependent ubiquitination and sorting of specific cargo proteins at the multivesicular body; mRNA is targeted to the bud via the mRNA transport system involving She2p
YOR335C	1274.99	0.0653656	0.247888	0.992604	1274.99	0.0105808	0.341746	0.999906	1274.99	0.0547848	0.422183	0.999827	ALA1	Cytoplasmic and mitochondrial alanyl-tRNA synthetase, required for protein synthesis; point mutation (cdc64-1 allele) causes cell cycle arrest at G1; lethality of null mutation is functionally complemented by human homolog
YCR028C-A	114.379	0.281462	0.35864	0.959028	114.379	0.603268	0.492596	0.999906	114.379	-0.321806	0.609293	0.999827	RIM1	Single-stranded DNA-binding protein essential for mitochondrial genome maintenance; involved in mitochondrial DNA replication
YDR295C	34.3055	0.0494701	0.484165	NA	34.3055	0.0284492	0.573388	0.999906	34.3055	0.0210209	0.750436	0.999827	HDA2	Subunit of a possibly tetrameric trichostatin A-sensitive class II histone deacetylase complex containing an Hda1p homodimer and an Hda2p-Hda3p heterodimer; involved in telomere maintenance
YPR097W	116.096	0.0718118	0.349111	0.992604	116.096	-0.495933	0.459122	0.999906	116.096	0.567745	0.576781	0.999827		Protein that contains a Phox homology (PX) domain and binds phosphoinositides; the authentic, non-tagged protein is detected in highly purified mitochondria in high-throughput studies
YDL150W	96.0099	-0.43147	0.382709	0.959028	96.0099	-0.017772	0.496124	0.999906	96.0099	-0.413698	0.626582	0.999827	RPC53	RNA polymerase III subunit C53
YOR371C	62.5928	-0.155151	0.432901	NA	62.5928	-0.119271	0.535893	0.999906	62.5928	-0.0358793	0.688898	0.999827	GPB1	Multistep regulator of cAMP-PKA signaling; inhibits PKA downstream of Gpa2p and Cyr1p, thereby increasing cAMP dependency; promotes ubiquitin-dependent proteolysis of Ira2p; regulated by G-alpha protein Gpa2p; homolog of Gpb2p
YHR057C	68.7253	0.265321	0.446601	0.979138	68.7253	-0.0840313	0.562882	0.999906	68.7253	0.349353	0.718521	0.999827	CPR2	Peptidyl-prolyl cis-trans isomerase (cyclophilin), catalyzes the cis-trans isomerization of peptide bonds N-terminal to proline residues; has a potential role in the secretory pathway
YKR010C	32.1048	-0.373461	0.505711	NA	32.1048	-0.28751	0.579405	0.999906	32.1048	-0.0859508	0.76906	0.999827	TOF2	Protein required for rDNA silencing and mitotic rDNA condensation; stimulates Cdc14p phosphatase activity and biphasic release to promote rDNA repeat segregation; required for condensin recruitment to the replication fork barrier site
YMR016C	36.9552	0.731939	0.511983	NA	36.9552	-0.0736756	0.594018	0.999906	36.9552	0.805614	0.78419	0.999827	SOK2	Nuclear protein that plays a regulatory role in the cyclic AMP (cAMP)-dependent protein kinase (PKA) signal transduction pathway; negatively regulates pseudohyphal differentiation; homologous to several transcription factors
YNR051C	154.917	-0.00351892	0.341745	0.999114	154.917	-0.0686518	0.454941	0.999906	154.917	0.0651329	0.568999	0.999827	BRE5	Ubiquitin protease cofactor, forms deubiquitination complex with Ubp3p that coregulates anterograde and retrograde transport between the endoplasmic reticulum and Golgi compartments; null is sensitive to brefeldin A
YMR135C	47.6162	-0.677517	0.46104	NA	47.6162	-0.11931	0.561412	0.999906	47.6162	-0.558207	0.726463	0.999827	GID8	Protein of unknown function, involved in proteasome-dependent catabolite inactivation of fructose-1,6-bisphosphatase; contains LisH and CTLH domains, like Vid30p; dosage-dependent regulator of START
YLR336C	163.349	-0.462619	0.341692	0.959028	163.349	-0.150315	0.450562	0.999906	163.349	-0.312304	0.565473	0.999827	SGD1	Essential nuclear protein, required for biogenesis of the small ribosomal subunit; has a possible role in the osmoregulatory glycerol response; putative homolog of human NOM1 which is implicated in acute myeloid leukemia
YOL078W	54.6498	-0.140413	0.441216	NA	54.6498	-0.478614	0.532554	0.999906	54.6498	0.338202	0.691587	0.999827	AVO1	Component of a membrane-bound complex containing the Tor2p kinase and other proteins, which may have a role in regulation of cell growth
YPL026C	40.217	-0.0798773	0.505947	NA	40.217	-0.261979	0.572081	0.999906	40.217	0.182102	0.763712	0.999827	SKS1	Putative serine/threonine protein kinase; involved in the adaptation to low concentrations of glucose independent of the SNF3 regulated pathway
YPL127C	147.031	0.287837	0.345647	0.959028	147.031	0.163934	0.4695	0.999906	147.031	0.123903	0.583001	0.999827	HHO1	Histone H1, a linker histone required for nucleosome packaging at restricted sites; suppresses DNA repair involving homologous recombination; not required for telomeric silencing, basal transcriptional repression, or efficient sporulation
YBR109C	229.44	0.122759	0.29309	0.992604	229.44	7.19651e-05	0.416834	0.999906	229.44	0.122687	0.509557	0.999827	CMD1	Calmodulin; Ca++ binding protein that regulates Ca++ independent processes (mitosis, bud growth, actin organization, endocytosis, etc.) and Ca++ dependent processes (stress-activated pathways), targets include Nuf1p, Myo2p and calcineurin
YIL108W	116.834	0.245182	0.343155	0.967178	116.834	-0.255012	0.453506	0.999906	116.834	0.500194	0.568702	0.999827		Putative metalloprotease
YJR088C	85.6662	-0.134769	0.372148	0.992604	85.6662	0.171911	0.49875	0.999906	85.6662	-0.306679	0.62228	0.999827	EMC2	Member of a transmembrane complex required for efficient folding of proteins in the ER; null mutant displays induction of the unfolded protein response
YIL009W	69.3603	-0.456035	0.411844	0.959028	69.3603	-0.052514	0.510442	0.999906	69.3603	-0.403521	0.655871	0.999827	FAA3	Long chain fatty acyl-CoA synthetase, activates imported fatty acids; green fluorescent protein (GFP)-fusion protein localizes to the cell periphery
YGL043W	82.8226	0.512716	0.405863	0.959028	82.8226	0.15338	0.519403	0.999906	82.8226	0.359336	0.65915	0.999827	DST1	General transcription elongation factor TFIIS, enables RNA polymerase II to read through blocks to elongation by stimulating cleavage of nascent transcripts stalled at transcription arrest sites
YBR080C	310.831	0.198454	0.290158	0.967178	310.831	0.0841233	0.397714	0.999906	310.831	0.11433	0.492306	0.999827	SEC18	ATPase required for vesicular transport between ER and Golgi, the 'priming' step in homotypic vacuole fusion, autophagy, and protein secretion; releases Sec17p from SNAP complexes; has similarity to mammalian NSF
YOR324C	26.0526	-0.404572	0.528358	NA	26.0526	-0.288432	0.604879	0.999906	26.0526	-0.11614	0.803144	0.999827	FRT1	Tail-anchored ER membrane protein that is a substrate of the phosphatase calcineurin; interacts with homolog Frt2p; promotes cell growth in stress conditions, possibly via a role in posttranslational translocation
YLR006C	44.0883	0.179272	0.496955	NA	44.0883	-0.276733	0.577225	0.999906	44.0883	0.456004	0.761677	0.999827	SSK1	Cytoplasmic response regulator, part of a two-component signal transducer that mediates osmosensing via a phosphorelay mechanism; dephosphorylated form is degraded by the ubiquitin-proteasome system; potential Cdc28p substrate
YDR349C	59.6212	0.13734	0.429752	NA	59.6212	-0.345971	0.522997	0.999906	59.6212	0.483311	0.676917	0.999827	YPS7	Putative GPI-anchored aspartic protease, member of the yapsin family of proteases involved in cell wall growth and maintenance; located in the cytoplasm and endoplasmic reticulum
YER168C	103.08	0.0716852	0.36185	0.992604	103.08	-0.431206	0.483608	0.999906	103.08	0.502891	0.604001	0.999827	CCA1	ATP (CTP):tRNA-specific tRNA nucleotidyltransferase; different forms targeted to the nucleus, cytosol, and mitochondrion are generated via the use of multiple transcriptional and translational start sites
YGL106W	161.586	-0.0216643	0.34828	0.992952	161.586	0.581565	0.467972	0.999906	161.586	-0.603229	0.583342	0.999827	MLC1	Essential light chain for Myo1p, light chain for Myo2p; stabilizes Myo2p by binding to the neck region; interacts with Myo1p, Iqg1p, and Myo2p to coordinate formation and contraction of the actomyosin ring with targeted membrane deposition
YKL182W	3333.37	-0.0563731	0.239706	0.992604	3333.37	-0.0550543	0.32846	0.999906	3333.37	-0.00131884	0.406627	0.999827	FAS1	Beta subunit of fatty acid synthetase, which catalyzes the synthesis of long-chain saturated fatty acids; contains acetyltransacylase, dehydratase, enoyl reductase, malonyl transacylase, and palmitoyl transacylase activities
YPR086W	138.726	0.0880381	0.336307	0.992604	138.726	0.830621	0.444406	0.999906	138.726	-0.742583	0.557301	0.999827	SUA7	Transcription factor TFIIB, a general transcription factor required for transcription initiation and start site selection by RNA polymerase II
YDR284C	77.0058	0.455283	0.402707	0.959028	77.0058	0.307786	0.520019	0.999906	77.0058	0.147496	0.657675	0.999827	DPP1	Diacylglycerol pyrophosphate (DGPP) phosphatase, zinc-regulated vacuolar membrane-associated lipid phosphatase, dephosphorylates DGPP to phosphatidate (PA) and Pi, then PA to diacylglycerol; involved in lipid signaling and cell metabolism
YOR360C	60.4703	0.0585222	0.447281	NA	60.4703	-0.182557	0.544251	0.999906	60.4703	0.241079	0.70446	0.999827	PDE2	High-affinity cyclic AMP phosphodiesterase, component of the cAMP-dependent protein kinase signaling system, protects the cell from extracellular cAMP, contains readthrough motif surrounding termination codon
YBL020W	60.6265	0.051012	0.409891	NA	60.6265	0.484991	0.522722	0.999906	60.6265	-0.433979	0.664231	0.999827	RFT1	Essential integral membrane protein that is required for translocation of Man5GlcNac2-PP-Dol from the cytoplasmic side to the lumenal side of the ER membrane but is not the flippase; mutation is suppressed by expression of human p53 protein
YOR261C	272.885	0.244783	0.332135	0.967178	272.885	0.0928884	0.438159	0.999906	272.885	0.151894	0.549813	0.999827	RPN8	Essential, non-ATPase regulatory subunit of the 26S proteasome; has similarity to the human p40 proteasomal subunit and to another S. cerevisiae regulatory subunit, Rpn11p
YGL241W	91.6615	0.223815	0.370697	0.979138	91.6615	0.700981	0.480637	0.999906	91.6615	-0.477167	0.606949	0.999827	KAP114	Karyopherin, responsible for nuclear import of Spt15p, Sua7p, histones H2A and H2B, and Nap1p; amino terminus shows similarity to those of other importins, particularly Cse1p; localization is primarily nuclear
YHR046C	72.5701	0.184467	0.41092	0.992604	72.5701	0.242834	0.522546	0.999906	72.5701	-0.0583673	0.664744	0.999827	INM1	Inositol monophosphatase, involved in biosynthesis of inositol and in phosphoinositide second messenger signaling; INM1 expression increases in the presence of inositol and decreases upon exposure to antibipolar drugs lithium and valproate
YLR305C	298.212	-0.122346	0.32014	0.992604	298.212	-0.265659	0.419983	0.999906	298.212	0.143313	0.528087	0.999827	STT4	Phosphatidylinositol-4-kinase that functions in the Pkc1p protein kinase pathway; required for normal vacuole morphology, cell wall integrity, and actin cytoskeleton organization
YPL163C	128.535	0.638268	0.442156	0.959028	128.535	0.591756	0.549579	0.999906	128.535	0.0465123	0.705353	0.999827	SVS1	Cell wall and vacuolar protein, required for wild-type resistance to vanadate
YMR227C	56.5024	-1.10873	0.4091	NA	56.5024	-0.0783481	0.526444	0.999906	56.5024	-1.03038	0.666726	0.999827	TAF7	TFIID subunit (67 kDa), involved in RNA polymerase II transcription initiation
YPL206C	79.6847	0.113232	0.380328	0.992604	79.6847	0.0714477	0.516453	0.999906	79.6847	0.0417845	0.641363	0.999827	PGC1	Phosphatidyl Glycerol phospholipase C; regulates the phosphatidylglycerol (PG) content via a phospholipase C-type degradation mechanism; contains glycerophosphodiester phosphodiesterase motifs
YNR026C	101.729	0.262329	0.368134	0.967178	101.729	-0.250317	0.486541	0.999906	101.729	0.512646	0.610117	0.999827	SEC12	Guanine nucleotide exchange factor (GEF), activates Sar1p by catalyzing the exchange of GDP for GTP; required for the initiation of COPII vesicle formation in ER to Golgi transport; glycosylated integral membrane protein of the ER
YMR205C	2118.33	0.490033	0.248988	0.869854	2118.33	0.273465	0.34111	0.999906	2118.33	0.216567	0.422316	0.999827	PFK2	Beta subunit of heterooctameric phosphofructokinase involved in glycolysis, indispensable for anaerobic growth, activated by fructose-2,6-bisphosphate and AMP, mutation inhibits glucose induction of cell cycle-related genes
YPL040C	32.7903	0.388919	0.50802	NA	32.7903	0.0660637	0.574866	0.999906	32.7903	0.322855	0.767107	0.999827	ISM1	Mitochondrial isoleucyl-tRNA synthetase, null mutant is deficient in respiratory growth
YPL141C	115.154	-0.310449	0.371784	0.959028	115.154	-0.809713	0.466927	0.999906	115.154	0.499264	0.596866	0.999827	FRK1	Putative protein kinase; similar to Kin4p; green fluorescent protein (GFP)-fusion protein localizes to the cytoplasm; interacts with rRNA transcription and ribosome biogenesis factors and the long chain fatty acyl-CoA synthetase Faa3
YHR165C	260.193	-0.278088	0.313836	0.959028	260.193	-0.16256	0.41161	0.999906	260.193	-0.115528	0.517606	0.999827	PRP8	Component of the U4/U6-U5 snRNP complex, involved in the second catalytic step of splicing; mutations of human Prp8 cause retinitis pigmentosa
YDL004W	95.2814	0.436189	0.399119	0.959028	95.2814	0.59171	0.529088	0.999906	95.2814	-0.155521	0.662692	0.999827	ATP16	Delta subunit of the central stalk of mitochondrial F1F0 ATP synthase, which is a large, evolutionarily conserved enzyme complex required for ATP synthesis; phosphorylated
YBL046W	72.641	-0.396151	0.387652	0.959028	72.641	0.147005	0.50948	0.999906	72.641	-0.543157	0.640189	0.999827	PSY4	Putative regulatory subunit of an evolutionarily conserved protein phosphatase; localization is cell-cycle dependent and regulated by Cdc28p phosphorylation; required for cisplatin resistance; homolog of mammalian R2
YEL027W	782.29	0.449078	0.335817	0.959028	782.29	0.0897354	0.447766	0.999906	782.29	0.359342	0.559703	0.999827	VMA3	Proteolipid subunit of the vacuolar H(+)-ATPase V0 sector (subunit c; dicyclohexylcarbodiimide binding subunit); required for vacuolar acidification and important for copper and iron metal ion homeostasis
YHR064C	1230.48	0.000421349	0.258071	1	1230.48	0.0334919	0.354607	0.999906	1230.48	-0.0330705	0.438574	0.999827	SSZ1	Hsp70 protein that interacts with Zuo1p (a DnaJ homolog) to form a ribosome-associated complex that binds the ribosome via the Zuo1p subunit; also involved in pleiotropic drug resistance via sequential activation of PDR1 and PDR5; binds ATP
YGL227W	86.9775	-0.268318	0.417164	0.970619	86.9775	-0.159576	0.529078	0.999906	86.9775	-0.108742	0.673756	0.999827	VID30	Protein involved in proteasome-dependent catabolite degradation of fructose-1,6-bisphosphatase (FBPase); binds FBPase; shifts the balance of nitrogen metabolism toward glutamate production; localizes to the nucleus and the cytoplasm
YLR262C	82.3576	-0.861782	0.372162	0.735749	82.3576	0.15591	0.502271	0.999906	82.3576	-1.01769	0.625133	0.999827	YPT6	Rab family GTPase, Ras-like GTP binding protein involved in the secretory pathway, required for fusion of endosome-derived vesicles with the late Golgi, maturation of the vacuolar carboxypeptidase Y; has similarity to the human GTPase, Rab6
YGR148C	854.672	-0.791579	0.376578	0.829774	854.672	0.193383	0.489892	0.999906	854.672	-0.984962	0.617904	0.999827	RPL24B	Ribosomal protein L30 of the large (60S) ribosomal subunit, nearly identical to Rpl24Ap and has similarity to rat L24 ribosomal protein; not essential for translation but may be required for normal translation rate
YOR207C	357.023	-0.363271	0.303478	0.959028	357.023	-0.0798015	0.410435	0.999906	357.023	-0.283469	0.510447	0.999827	RET1	Second-largest subunit of RNA polymerase III, which is responsible for the transcription of tRNA and 5S RNA genes, and other low molecular weight RNAs
YDR169C	33.2809	0.431038	0.476338	NA	33.2809	0.484802	0.574175	0.999906	33.2809	-0.0537635	0.745914	0.999827	STB3	Ribosomal RNA processing element (RRPE)-binding protein involved in the glucose-induced transition from quiescence to growth; restricted to nucleus in quiescent cells, released into cytoplasm after glucose repletion; binds Sin3p
YPR169W	91.8078	-0.600936	0.386233	0.959028	91.8078	-0.0188134	0.491382	0.999906	91.8078	-0.582122	0.625007	0.999827	JIP5	Essential protein required for biogenesis of the large ribosomal subunit; interacts with proteins involved in RNA processing, ribosome biogenesis, ubiquitination and demethylation; similar to WDR55, a human WD repeat protein
YPL004C	592.59	0.0808301	0.399077	0.992604	592.59	0.0827905	0.513654	0.999906	592.59	-0.00196045	0.650463	0.999827	LSP1	Primary component of eisosomes, which are large immobile patch structures at the cell cortex associated with endocytosis, along with Pil1p and Sur7p; null mutants show activation of Pkc1p/Ypk1p stress resistance pathways
YGR085C	1599.72	-0.157326	0.26065	0.979138	1599.72	-0.0164097	0.35502	0.999906	1599.72	-0.140916	0.440429	0.999827	RPL11B	Protein component of the large (60S) ribosomal subunit, nearly identical to Rpl11Ap; involved in ribosomal assembly; depletion causes degradation of proteins and RNA of the 60S subunit; has similarity to E. coli L5 and rat L11
YKR089C	112.277	0.108491	0.36887	0.992604	112.277	0.189308	0.467169	0.999906	112.277	-0.0808167	0.595231	0.999827	TGL4	Multifunctional triacylglycerol lipase, steryl ester hydrolase, and Ca2+-independent phospholipase A2; catalyzes acyl-CoA dependent acylation of LPA to PA; required with Tgl3p for timely bud formation; phosphorylated and activated by Cdc28p
YPL105C	109.235	-0.833184	0.396157	0.829774	109.235	-0.0753393	0.499685	0.999906	109.235	-0.757845	0.637674	0.999827	SYH1	Protein of unknown function that may interact with ribosomes, based on co-purification experiments; authentic, non-tagged protein is detected in highly purified mitochondria in high-throughput studies
YOR342C	49.8135	0.342518	0.492276	NA	49.8135	0.450362	0.582605	0.999906	49.8135	-0.107844	0.762702	0.999827		Putative protein of unknown function; green fluorescent protein (GFP)-fusion protein localizes to the cytoplasm and the nucleus
YDL141W	83.5646	0.332954	0.372393	0.959028	83.5646	0.0324231	0.483811	0.999906	83.5646	0.300531	0.610514	0.999827	BPL1	Biotin:apoprotein ligase, covalently modifies proteins with the addition of biotin, required for acetyl-CoA carboxylase (Acc1p) holoenzyme formation
YBL002W	277.922	0.346803	0.368936	0.959028	277.922	-0.257983	0.4793	0.999906	277.922	0.604786	0.604849	0.999827	HTB2	Histone H2B, core histone protein required for chromatin assembly and chromosome function; nearly identical to HTB1; Rad6p-Bre1p-Lge1p mediated ubiquitination regulates transcriptional activation, meiotic DSB formation and H3 methylation
YOR243C	199.558	-0.377234	0.329674	0.959028	199.558	0.169642	0.438256	0.999906	199.558	-0.546875	0.548409	0.999827	PUS7	Pseudouridine synthase, catalyzes pseudouridylation at positions 35 and 56 in U2 snRNA, position 50 in 5S rRNA, position 13 in cytoplasmic tRNAs, and position 35 in pre-tRNA(Tyr); conserved in archaea, vertebrates, and some bacteria
YDR529C	76.1797	0.0553138	0.511035	0.992604	76.1797	0.70808	0.613699	0.999906	76.1797	-0.652767	0.798593	0.999827	QCR7	Subunit 7 of the ubiquinol cytochrome-c reductase complex, which is a component of the mitochondrial inner membrane electron transport chain; oriented facing the mitochondrial matrix; N-terminus appears to play a role in complex assembly
YGL160W	54.2581	0.372927	0.431935	NA	54.2581	0.527724	0.533563	0.999906	54.2581	-0.154797	0.686399	0.999827	AIM14	Protein with similarity to iron/copper reductases (FRE1-8), possibly involved in iron homeostasis; may interact with ribosomes; null mutant displays elevated frequency of mitochondrial genome loss
YCR009C	136.861	0.146992	0.357707	0.992604	136.861	-0.139317	0.474842	0.999906	136.861	0.286309	0.594496	0.999827	RVS161	Amphiphysin-like lipid raft protein; interacts with Rvs167p and regulates polarization of the actin cytoskeleton, endocytosis, cell polarity, cell fusion and viability following starvation or osmotic stress
YKR100C	38.275	-0.495769	0.459077	NA	38.275	0.104379	0.560292	0.999906	38.275	-0.600148	0.724349	0.999827	SKG1	Transmembrane protein with a role in cell wall polymer composition; localizes on the inner surface of the plasma membrane at the bud and in the daughter cell
YJL082W	86.5619	-0.511831	0.42774	0.959028	86.5619	0.0310053	0.543184	0.999906	86.5619	-0.542837	0.691384	0.999827	IML2	Protein of unknown function; the authentic, non-tagged protein is detected in highly purified mitochondria in high-throughput studies
YKR001C	475.053	-0.0646599	0.291491	0.992604	475.053	0.54025	0.403961	0.999906	475.053	-0.60491	0.498146	0.999827	VPS1	Dynamin-like GTPase required for vacuolar sorting; also involved in actin cytoskeleton organization, endocytosis, late Golgi-retention of some proteins, regulation of peroxisome biogenesis
YLR024C	79.9748	0.383396	0.407053	0.959028	79.9748	0.0759682	0.496344	0.999906	79.9748	0.307428	0.641898	0.999827	UBR2	Cytoplasmic ubiquitin-protein ligase (E3); required for ubiquitylation of Rpn4p; mediates formation of a Mub1p-Ubr2p-Rad6p complex
YPL242C	119.296	-1.09921	0.408513	0.628725	119.296	-0.740682	0.500765	0.999906	119.296	-0.35853	0.646245	0.999827	IQG1	Essential protein required for determination of budding pattern, promotes localization of axial markers Bud4p and Cdc12p and functionally interacts with Sec3p, localizes to the contractile ring during anaphase, member of the IQGAP family
YNL291C	58.1576	0.660686	0.43813	NA	58.1576	-0.0935029	0.529315	0.999906	58.1576	0.754189	0.687102	0.999827	MID1	N-glycosylated integral membrane protein of the ER membrane and plasma membrane, functions as a stretch-activated Ca2+-permeable cation channel required for Ca2+ influx stimulated by pheromone; interacts with Cch1p; forms an oligomer
YNR033W	75.369	-0.279926	0.413482	0.967178	75.369	-0.434024	0.515211	0.999906	75.369	0.154098	0.660614	0.999827	ABZ1	Para-aminobenzoate (PABA) synthase, has similarity to Escherichia coli PABA synthase components PabA and PabB; required for the synthesis of para-aminobenzoic acid, an important intermediate for folate and ubiquinone Q biosynthesis
YGL131C	35.1837	-0.870621	0.528462	NA	35.1837	0.644323	0.591368	0.999906	35.1837	-1.51494	0.793156	0.999827	SNT2	DNA binding protein with similarity to the S. pombe Snt2 protein; computational analysis suggests a role in regulation of expression of genes encoding amine transporters
YOL139C	394.196	-0.127823	0.306703	0.992604	394.196	0.0741358	0.415193	0.999906	394.196	-0.201959	0.516189	0.999827	CDC33	Cytoplasmic mRNA cap binding protein and translation initiation factor eIF4E; the eIF4E-cap complex is responsible for mediating cap-dependent mRNA translation via interactions with translation initiation factor eIF4G (Tif4631p or Tif4632p)
YHR071W	70.6075	0.35915	0.47146	0.962661	70.6075	0.547774	0.540117	0.999906	70.6075	-0.188624	0.716893	0.999827	PCL5	Cyclin, interacts with and phosphorylated by Pho85p cyclin-dependent kinase (Cdk), induced by Gcn4p at level of transcription, specifically required for Gcn4p degradation, may be sensor of cellular protein biosynthetic capacity
YEL054C	1697.17	0.152648	0.255048	0.979138	1697.17	0.174467	0.348691	0.999906	1697.17	-0.0218191	0.432012	0.999827	RPL12A	Protein component of the large (60S) ribosomal subunit, nearly identical to Rpl12Bp; rpl12a rpl12b double mutant exhibits slow growth and slow translation; has similarity to E. coli L11 and rat L12 ribosomal proteins
YBR158W	56.8273	-0.169064	0.485468	NA	56.8273	0.230395	0.537738	0.999906	56.8273	-0.399459	0.724441	0.999827	AMN1	Protein required for daughter cell separation, multiple mitotic checkpoints, and chromosome stability; contains 12 degenerate leucine-rich repeat motifs; expression is induced by the Mitotic Exit Network (MEN)
YLR075W	6122.68	-0.210629	0.280843	0.962661	6122.68	0.215562	0.378971	0.999906	6122.68	-0.426192	0.47169	0.999827	RPL10	Protein component of the large (60S) ribosomal subunit, responsible for joining the 40S and 60S subunits; regulates translation initiation; has similarity to rat L10 ribosomal protein and to members of the QM gene family
YLL019C	88.0916	0.333667	0.443618	0.962661	88.0916	0.275402	0.523916	0.999906	88.0916	0.0582646	0.686486	0.999827	KNS1	Nonessential putative protein kinase of unknown cellular role; member of the LAMMER family of protein kinases, which are serine/threonine kinases also capable of phosphorylating tyrosine residues
YNL219C	145.643	0.326944	0.37857	0.959028	145.643	0.00536362	0.492618	0.999906	145.643	0.32158	0.621274	0.999827	ALG9	Mannosyltransferase, involved in N-linked glycosylation; catalyzes the transfer of mannose from Dol-P-Man to lipid-linked oligosaccharides; mutation of the human ortholog causes type 1 congenital disorders of glycosylation
YDL213C	101.586	-0.668972	0.370342	0.954008	101.586	-0.434853	0.490592	0.999906	101.586	-0.234118	0.61468	0.999827	NOP6	Putative RNA-binding protein implicated in ribosome biogenesis; contains an RNA recognition motif (RRM) and has similarity to hydrophilins; NOP6 may be a fungal-specific gene as no homologs have been yet identified in higher eukaryotes
YFL013C	70.3226	-0.112632	0.394022	0.992604	70.3226	-0.0189255	0.503596	0.999906	70.3226	-0.0937067	0.639416	0.999827	IES1	Subunit of the INO80 chromatin remodeling complex
YGL056C	93.8887	0.238381	0.374523	0.971825	93.8887	-0.225516	0.480512	0.999906	93.8887	0.463897	0.609228	0.999827	SDS23	One of two S. cerevisiae homologs (Sds23p and Sds24p) of the S. pombe Sds23 protein, which is implicated in APC/cyclosome regulation; involved in cell separation during budding
YGR191W	158.245	-0.1403	0.349039	0.992604	158.245	0.241969	0.465942	0.999906	158.245	-0.38227	0.582174	0.999827	HIP1	High-affinity histidine permease, also involved in the transport of manganese ions
YLR435W	131.752	-0.610504	0.336627	0.95065	131.752	-0.326929	0.459335	0.999906	131.752	-0.283575	0.569479	0.999827	TSR2	Protein with a potential role in pre-rRNA processing
YKL179C	94.9181	-0.284735	0.370554	0.962168	94.9181	0.471432	0.481307	0.999906	94.9181	-0.756167	0.607419	0.999827	COY1	Golgi membrane protein with similarity to mammalian CASP; genetic interactions with GOS1 (encoding a Golgi snare protein) suggest a role in Golgi function
YBR279W	116.768	-0.215322	0.357493	0.979138	116.768	-0.112484	0.472411	0.999906	116.768	-0.102838	0.592428	0.999827	PAF1	Component of the Paf1p complex that binds to and modulates the activity of RNA polymerases I and II; required for expression of a subset of genes, including cell cycle-regulated genes; homolog of human PD2/hPAF1
YDL055C	2256.33	0.407953	0.241002	0.959028	2256.33	0.347874	0.331038	0.999906	2256.33	0.0600782	0.409472	0.999827	PSA1	GDP-mannose pyrophosphorylase (mannose-1-phosphate guanyltransferase), synthesizes GDP-mannose from GTP and mannose-1-phosphate in cell wall biosynthesis; required for normal cell wall structure
YBL017C	342.754	0.0405479	0.313845	0.992604	342.754	-0.0209434	0.415901	0.999906	342.754	0.0614913	0.521029	0.999827	PEP1	Type I transmembrane sorting receptor for multiple vacuolar hydrolases; cycles between the late-Golgi and prevacuolar endosome-like compartments
YIL094C	185.876	0.320073	0.315354	0.959028	185.876	0.619865	0.42433	0.999906	185.876	-0.299793	0.528668	0.999827	LYS12	Homo-isocitrate dehydrogenase, an NAD-linked mitochondrial enzyme required for the fourth step in the biosynthesis of lysine, in which homo-isocitrate is oxidatively decarboxylated to alpha-ketoadipate
YMR276W	411.136	0.354159	0.291136	0.959028	411.136	0.255494	0.401602	0.999906	411.136	0.098665	0.496026	0.999827	DSK2	Nuclear-enriched ubiquitin-like polyubiquitin-binding protein, required for spindle pole body (SPB) duplication and for transit through the G2/M phase of the cell cycle, involved in proteolysis, interacts with the proteasome
YOR230W	367.356	0.0841698	0.305041	0.992604	367.356	0.153455	0.419911	0.999906	367.356	-0.0692849	0.519011	0.999827	WTM1	Transcriptional modulator involved in regulation of meiosis, silencing, and expression of RNR genes; required for nuclear localization of the ribonucleotide reductase small subunit Rnr2p and Rnr4p; contains WD repeats
YJL178C	128.396	-0.0618468	0.34843	0.992604	128.396	0.168132	0.472757	0.999906	128.396	-0.229978	0.587277	0.999827	ATG27	Type I membrane protein involved in autophagy and the cytoplasm-to-vacuole targeting (Cvt) pathway; may be involved in membrane delivery to the phagophore assembly site
YML018C	46.5594	-0.293655	0.489844	NA	46.5594	0.105297	0.588114	0.999906	46.5594	-0.398951	0.765388	0.999827		Putative protein of unknown function; green fluorescent protein (GFP)-fusion protein localizes to the membrane of the vacuole; physical interaction with Atg27p suggests a possible role in autophagy; YML018C is not an essential gene
YDR170W-A	227.271	0.261358	0.343414	0.962661	227.271	0.274906	0.44371	0.999906	227.271	-0.0135489	0.561077	0.999827		Retrotransposon TYA Gag gene; Gag is a nucleocapsid protein that is the structural constituent of virus-like particles (VLPs); similar to retroviral Gag; YDR170W-A is part of a mutant retrotransposon
YLR332W	72.9846	0.411022	0.470916	0.959028	72.9846	-0.153964	0.569459	0.999906	72.9846	0.564987	0.738946	0.999827	MID2	O-glycosylated plasma membrane protein that acts as a sensor for cell wall integrity signaling and activates the pathway; interacts with Rom2p, a guanine nucleotide exchange factor for Rho1p, and with cell integrity pathway protein Zeo1p
YDR138W	75.3737	-0.317121	0.406151	0.959028	75.3737	0.014004	0.512439	0.999906	75.3737	-0.331125	0.653873	0.999827	HPR1	Subunit of THO/TREX complexes that couple transcription elongation with mitotic recombination and with mRNA metabolism and export, subunit of an RNA Pol II complex; regulates lifespan; involved in telomere maintenance; similar to Top1p
YMR012W	909.422	-0.0465337	0.28608	0.992604	909.422	-0.0269512	0.387083	0.999906	909.422	-0.0195825	0.481326	0.999827	CLU1	eIF3 component of unknown function; deletion causes defects in mitochondrial organization but not in growth or translation initiation, can rescue cytokinesis and mitochondrial organization defects of the Dictyostelium cluA- mutant
YKL197C	49.9826	0.0677361	0.452807	NA	49.9826	-0.600548	0.543563	0.999906	49.9826	0.668284	0.707475	0.999827	PEX1	AAA-peroxin that heterodimerizes with AAA-peroxin Pex6p and participates in the recycling of peroxisomal signal receptor Pex5p from the peroxisomal membrane to the cystosol; induced by oleic acid and upregulated during anaerobiosis
YBL035C	50.679	-0.171438	0.483817	NA	50.679	0.459324	0.583215	0.999906	50.679	-0.630762	0.757762	0.999827	POL12	B subunit of DNA polymerase alpha-primase complex, required for initiation of DNA replication during mitotic and premeiotic DNA synthesis; also functions in telomere capping and length regulation
YIR016W	23.1915	-0.722398	0.626352	NA	23.1915	-0.183512	0.645275	0.999906	23.1915	-0.538886	0.899277	0.999827		Putative protein of unknown function; expression directly regulated by the metabolic and meiotic transcriptional regulator Ume6p; overexpression causes a cell cycle delay or arrest; YIR016W is a non-essential gene
YPR063C	105.693	0.799515	0.420774	0.907475	105.693	-0.0780239	0.535743	0.999906	105.693	0.877539	0.681217	0.999827		ER-localized protein of unknown function
YDR291W	70.8038	-0.0358992	0.412991	0.992604	70.8038	-0.018402	0.507819	0.999906	70.8038	-0.0174972	0.654547	0.999827	HRQ1	Putative RecQ helicase; belongs to the widely conserved RecQ family of proteins which are involved in maintaining genomic integrity; similar to the human RecQ4p implicated in Rothmund-Thomson syndrome(RTS)
YGR090W	296.613	-0.0183977	0.313667	0.992952	296.613	-0.287282	0.414611	0.999906	296.613	0.268884	0.519893	0.999827	UTP22	Possible U3 snoRNP protein involved in maturation of pre-18S rRNA, based on computational analysis of large-scale protein-protein interaction data
YDL231C	35.3556	-0.545796	0.552832	NA	35.3556	0.486084	0.588762	0.999906	35.3556	-1.03188	0.807639	0.999827	BRE4	Zinc finger protein containing five transmembrane domains; null mutant exhibits strongly fragmented vacuoles and sensitivity to brefeldin A, a drug which is known to affect intracellular transport
YJL196C	264.877	0.294631	0.327699	0.959028	264.877	0.235754	0.448342	0.999906	264.877	0.0588769	0.555328	0.999827	ELO1	Elongase I, medium-chain acyl elongase, catalyzes carboxy-terminal elongation of unsaturated C12-C16 fatty acyl-CoAs to C16-C18 fatty acids
YLR299W	112.707	0.264524	0.385229	0.967178	112.707	0.0531103	0.494446	0.999906	112.707	0.211414	0.626793	0.999827	ECM38	Gamma-glutamyltranspeptidase, major glutathione-degrading enzyme; involved in detoxification of electrophilic xenobiotics; expression induced mainly by nitrogen starvation
YLR057W	68.2638	0.204967	0.427483	0.992604	68.2638	-0.476169	0.519868	0.999906	68.2638	0.681135	0.673062	0.999827		Putative protein of unknown function; YLR050W is not an essential gene
YCR094W	51.0205	0.147281	0.476754	NA	51.0205	-0.140337	0.578155	0.999906	51.0205	0.287617	0.749366	0.999827	CDC50	Endosomal protein that interacts with phospholipid flippase Drs2p; interaction with Cdc50p is essential for Drs2p catalytic activity; mutations affect cell polarity and polarized growth; similar to Ynr048wp and Lem3p
YFR019W	116.193	-0.189746	0.377413	0.991583	116.193	-0.1468	0.473479	0.999906	116.193	-0.0429464	0.605493	0.999827	FAB1	1-phosphatidylinositol-3-phosphate 5-kinase; vacuolar membrane kinase that generates phosphatidylinositol (3,5)P2, which is involved in vacuolar sorting and homeostasis
YDR093W	267.166	0.0440373	0.333802	0.992604	267.166	-0.0106874	0.437809	0.999906	267.166	0.0547247	0.550545	0.999827	DNF2	Aminophospholipid translocase (flippase) that localizes primarily to the plasma membrane; contributes to endocytosis, protein transport and cell polarity; type 4 P-type ATPase
YDL198C	118.359	0.204833	0.350218	0.982129	118.359	0.545647	0.484838	0.999906	118.359	-0.340814	0.598065	0.999827	GGC1	Mitochondrial GTP/GDP transporter, essential for mitochondrial genome maintenance; has a role in mitochondrial iron transport; member of the mitochondrial carrier family
YPL231W	3053.23	-0.0540644	0.242591	0.992604	3053.23	-0.0437362	0.33253	0.999906	3053.23	-0.0103282	0.411614	0.999827	FAS2	Alpha subunit of fatty acid synthetase, which catalyzes the synthesis of long-chain saturated fatty acids; contains the acyl-carrier protein domain and beta-ketoacyl reductase, beta-ketoacyl synthase and self-pantetheinylation activities
YAL036C	216.431	-0.088351	0.350509	0.992604	216.431	-0.0843481	0.467159	0.999906	216.431	-0.00400287	0.584032	0.999827	RBG1	Member of the DRG family of GTP-binding proteins; associates with translating ribosomes; interacts with Tma46p, Ygr250cp, Gir2p and Yap1p via two-hybrid
YLR417W	37.1468	0.251707	0.485969	NA	37.1468	0.254599	0.576649	0.999906	37.1468	-0.00289218	0.754079	0.999827	VPS36	Component of the ESCRT-II complex; contains the GLUE (GRAM Like Ubiquitin binding in EAP45) domain which is involved in interactions with ESCRT-I and ubiquitin-dependent sorting of proteins into the endosome
YKR050W	31.5074	-0.805935	0.58725	NA	31.5074	0.225864	0.626993	0.999906	31.5074	-1.0318	0.859084	0.999827	TRK2	Component of the Trk1p-Trk2p potassium transport system
YHR170W	308.522	-0.0848422	0.306953	0.992604	308.522	-0.183221	0.415867	0.999906	308.522	0.0983785	0.51688	0.999827	NMD3	Protein involved in nuclear export of the large ribosomal subunit; acts as a Crm1p-dependent adapter protein for export of nascent ribosomal subunits through the nuclear pore complex
YDL077C	55.764	-0.661337	0.438627	NA	55.764	-1.03382	0.547404	0.999906	55.764	0.372479	0.701445	0.999827	VAM6	Vacuolar protein that plays a critical role in the tethering steps of vacuolar membrane fusion by facilitating guanine nucleotide exchange on small guanosine triphosphatase Ypt7p
YDL110C	130.626	0.0838289	0.456889	0.992604	130.626	-0.051259	0.576848	0.999906	130.626	0.135088	0.735864	0.999827	TMA17	Protein of unknown function that associates with ribosomes; heterozygous deletion demonstrated increases in chromosome instability in a rad9 deletion background; protein abundance is decreased upon intracellular iron depletion
YOR212W	111.429	-0.339146	0.367144	0.959028	111.429	0.255754	0.468006	0.999906	111.429	-0.5949	0.594829	0.999827	STE4	G protein beta subunit, forms a dimer with Ste18p to activate the mating signaling pathway, forms a heterotrimer with Gpa1p and Ste18p to dampen signaling; may recruit Rho1p to the polarized growth site during mating; contains WD40 repeats
YJL079C	185.726	-0.0185306	0.421769	0.994598	185.726	0.426054	0.542335	0.999906	185.726	-0.444585	0.687029	0.999827	PRY1	Protein of unknown function
YMR223W	31.2845	-0.235064	0.539662	NA	31.2845	0.163225	0.614361	0.999906	31.2845	-0.398289	0.817713	0.999827	UBP8	Ubiquitin-specific protease that is a component of the SAGA (Spt-Ada-Gcn5-Acetyltransferase) acetylation complex; required for SAGA-mediated deubiquitination of histone H2B
YNR044W	45.7149	0.781581	0.47566	NA	45.7149	0.0691062	0.571176	0.999906	45.7149	0.712475	0.743272	0.999827	AGA1	Anchorage subunit of a-agglutinin of a-cells, highly O-glycosylated protein with N-terminal secretion signal and C-terminal signal for addition of GPI anchor to cell wall, linked to adhesion subunit Aga2p via two disulfide bonds
YKL186C	40.0209	-0.29384	0.474807	NA	40.0209	-0.153889	0.569968	0.999906	40.0209	-0.139951	0.741823	0.999827	MTR2	mRNA transport regulator, essential nuclear protein; Mex67p and Mtr2p form a mRNA export complex which binds to RNA
YLR301W	189.925	0.106908	0.301646	0.992604	189.925	0.223362	0.420325	0.999906	189.925	-0.116454	0.517356	0.999827		Protein of unknown function that interacts with Sec72p
YMR194W	393.865	-0.156008	0.305744	0.989322	393.865	0.0203785	0.417051	0.999906	393.865	-0.176387	0.517118	0.999827	RPL36A	N-terminally acetylated protein component of the large (60S) ribosomal subunit, nearly identical to Rpl36Bp and has similarity to rat L36 ribosomal protein; binds to 5.8 S rRNA
YGL003C	32.7577	0.195695	0.517211	NA	32.7577	-0.397206	0.595976	0.999906	32.7577	0.592901	0.789121	0.999827	CDH1	Cell-cycle regulated activator of the anaphase-promoting complex/cyclosome (APC/C), which directs ubiquitination of cyclins resulting in mitotic exit; targets the APC/C to specific substrates including Cdc20p, Ase1p, Cin8p and Fin1p
YDR208W	85.3163	-0.688121	0.374186	0.92753	85.3163	0.0288606	0.467842	0.999906	85.3163	-0.716981	0.599079	0.999827	MSS4	Phosphatidylinositol-4-phosphate 5-kinase, involved in actin cytoskeleton organization and cell morphogenesis; multicopy suppressor of stt4 mutation
YHR143W	41.2814	0.409661	0.557489	NA	41.2814	-0.0535491	0.629181	0.999906	41.2814	0.46321	0.840623	0.999827	DSE2	Daughter cell-specific secreted protein with similarity to glucanases, degrades cell wall from the daughter side causing daughter to separate from mother; expression is repressed by cAMP
YHR042W	460.537	0.058941	0.26589	0.992604	460.537	-0.0706051	0.363946	0.999906	460.537	0.129546	0.450726	0.999827	NCP1	NADP-cytochrome P450 reductase; involved in ergosterol biosynthesis; associated and coordinately regulated with Erg11p
YHR204W	52.9843	-0.709401	0.449826	NA	52.9843	-0.303216	0.535325	0.999906	52.9843	-0.406186	0.699225	0.999827	MNL1	alpha-1,2-specific exomannosidase of the endoplasmic reticulum that generates a Man7GlcNac2 oligosaccharide signal on glycoproteins destined for ubiquitin-proteasome degradation
YDR280W	63.1434	-0.219222	0.431805	NA	63.1434	-0.318605	0.541273	0.999906	63.1434	0.0993832	0.692411	0.999827	RRP45	Exosome non-catalytic core component; involved in 3'-5' RNA processing and degradation in both the nucleus and the cytoplasm; has similarity to E. coli RNase PH and to human hRrp45p (PM/SCL-75, EXOSC9)
YBR286W	1330.37	0.296964	0.263746	0.959028	1330.37	0.057704	0.360516	0.999906	1330.37	0.23926	0.446692	0.999827	APE3	Vacuolar aminopeptidase Y, processed to mature form by Prb1p
YBR149W	386.597	0.662493	0.297468	0.804807	386.597	0.774885	0.414485	0.999906	386.597	-0.112392	0.51017	0.999827	ARA1	NADP+ dependent arabinose dehydrogenase, involved in carbohydrate metabolism; purified as homodimer; naturally occurs with a N-terminus degradation product
YJR040W	91.903	-0.131672	0.382614	0.992604	91.903	-0.195352	0.496703	0.999906	91.903	0.0636799	0.626981	0.999827	GEF1	Voltage-gated chloride channel localized to the golgi, the endosomal system, and plasma membrane, and involved in cation homeostasis; highly homologous to vertebrate voltage-gated chloride channels
YPL022W	65.9651	-0.126617	0.422378	0.992604	65.9651	-0.411047	0.512464	0.999906	65.9651	0.28443	0.664098	0.999827	RAD1	Single-stranded DNA endonuclease (with Rad10p), cleaves single-stranded DNA during nucleotide excision repair and double-strand break repair; subunit of Nucleotide Excision Repair Factor 1 (NEF1); homolog of human XPF protein
YPL220W	3265.44	-0.15764	0.246504	0.971825	3265.44	0.0984572	0.337621	0.999906	3265.44	-0.256097	0.418034	0.999827	RPL1A	N-terminally acetylated protein component of the large (60S) ribosomal subunit, nearly identical to Rpl1Bp and has similarity to E. coli L1 and rat L10a ribosomal proteins; rpl1a rpl1b double null mutation is lethal
YGL201C	110.013	-0.191706	0.397733	0.992604	110.013	0.0199278	0.513364	0.999906	110.013	-0.211633	0.649408	0.999827	MCM6	Protein involved in DNA replication; component of the Mcm2-7 hexameric complex that binds chromatin as a part of the pre-replicative complex
YCL043C	1704.85	0.435561	0.274853	0.959028	1704.85	0.330175	0.373401	0.999906	1704.85	0.105386	0.463651	0.999827	PDI1	Protein disulfide isomerase, multifunctional protein resident in the endoplasmic reticulum lumen, essential for the formation of disulfide bonds in secretory and cell-surface proteins, unscrambles non-native disulfide bonds
YJR105W	769.873	0.388011	0.262698	0.959028	769.873	-0.0795869	0.359624	0.999906	769.873	0.467598	0.445353	0.999827	ADO1	Adenosine kinase, required for the utilization of S-adenosylmethionine (AdoMet); may be involved in recycling adenosine produced through the methyl cycle
YAL005C	10546.5	0.468507	0.281337	0.959028	10546.5	0.150306	0.379533	0.999906	10546.5	0.318201	0.472436	0.999827	SSA1	ATPase involved in protein folding and nuclear localization signal (NLS)-directed nuclear transport; member of heat shock protein 70 (HSP70) family; forms a chaperone complex with Ydj1p; localized to the nucleus, cytoplasm, and cell wall
YDL167C	92.67	-0.24916	0.396318	0.974648	92.67	-0.0996919	0.496332	0.999906	92.67	-0.149468	0.635147	0.999827	NRP1	Putative RNA binding protein of unknown function; localizes to stress granules induced by glucose deprivation; predicted to be involved in ribosome biogenesis
YHR006W	67.7295	-0.190357	0.426925	0.992604	67.7295	-0.0294495	0.523807	0.999906	67.7295	-0.160908	0.675747	0.999827	STP2	Transcription factor, activated by proteolytic processing in response to signals from the SPS sensor system for external amino acids; activates transcription of amino acid permease genes
YKR027W	34.0117	-0.460677	0.482575	NA	34.0117	-0.180445	0.573278	0.999906	34.0117	-0.280231	0.749351	0.999827	BCH2	Member of the ChAPs family of proteins (Chs5p-Arf1p-binding proteins: Bch1p, Bch2p, Bud7p, Chs6p), that forms the exomer complex with Chs5p to mediate export of specific cargo proteins, including Chs3p, from the Golgi to the plasma membrane
YEL001C	137.462	-0.0565397	0.336678	0.992604	137.462	-0.096099	0.450331	0.999906	137.462	0.0395593	0.56227	0.999827	IRC22	Putative protein of unknown function; green fluorescent protein (GFP)-fusion localizes to the ER; YEL001C is non-essential; null mutant displays increased levels of spontaneous Rad52p foci
YIL085C	75.1515	0.120402	0.461507	0.992604	75.1515	-0.0841724	0.554155	0.999906	75.1515	0.204574	0.721158	0.999827	KTR7	Putative mannosyltransferase involved in protein glycosylation; member of the KRE2/MNT1 mannosyltransferase family
YBR084W	406.443	0.192602	0.278593	0.967178	406.443	-0.00101036	0.3752	0.999906	406.443	0.193613	0.467321	0.999827	MIS1	Mitochondrial C1-tetrahydrofolate synthase, involved in interconversion between different oxidation states of tetrahydrofolate (THF); provides activities of formyl-THF synthetase, methenyl-THF cyclohydrolase, and methylene-THF dehydrogenase
YLR345W	39.9278	-0.160994	0.473017	NA	39.9278	0.288621	0.572408	0.999906	39.9278	-0.449615	0.742535	0.999827		Similar to 6-phosphofructo-2-kinase/fructose-2,6-bisphosphatase enzymes responsible for the metabolism of fructoso-2,6-bisphosphate; mRNA expression is repressed by the Rfx1p-Tup1p-Ssn6p repressor complex; YLR345W is not an essential gene
YJL068C	107.597	0.45501	0.396682	0.959028	107.597	0.35265	0.534104	0.999906	107.597	0.10236	0.665263	0.999827		Non-essential intracellular esterase that can function as an S-formylglutathione hydrolase; may be involved in the detoxification of formaldehyde, which can be metabolized to S-formylglutathione; similar to human esterase D
YMR267W	35.0172	-0.365056	0.49019	NA	35.0172	-0.66131	0.586109	0.999906	35.0172	0.296254	0.764081	0.999827	PPA2	Mitochondrial inorganic pyrophosphatase, required for mitochondrial function and possibly involved in energy generation from inorganic pyrophosphate
YOR001W	122.081	-0.234785	0.343083	0.967178	122.081	0.0518589	0.447579	0.999906	122.081	-0.286644	0.563942	0.999827	RRP6	Nuclear exosome exonuclease component; has 3'-5' exonuclease activity; involved in RNA processing, maturation, surveillance, degradation, tethering, and export; has similarity to E. coli RNase D and to human PM-Sc1 100 (EXOSC10)
YNL183C	52.5137	0.145545	0.434996	NA	52.5137	-0.120325	0.531242	0.999906	52.5137	0.26587	0.686601	0.999827	NPR1	Protein kinase that stabilizes several plasma membrane amino acid transporters by antagonizing their ubiquitin-mediated degradation
YGR108W	124.414	-1.46599	0.406511	0.0807799	124.414	-1.45318	0.520125	0.999906	124.414	-0.0128153	0.660079	0.999827	CLB1	B-type cyclin involved in cell cycle progression; activates Cdc28p to promote the transition from G2 to M phase; accumulates during G2 and M, then targeted via a destruction box motif for ubiquitin-mediated degradation by the proteasome
YDL145C	1058.05	0.43244	0.273652	0.959028	1058.05	0.0710841	0.371148	0.999906	1058.05	0.361356	0.461125	0.999827	COP1	Alpha subunit of COPI vesicle coatomer complex, which surrounds transport vesicles in the early secretory pathway
YJL187C	61.219	0.251917	0.446967	NA	61.219	0.0510953	0.535193	0.999906	61.219	0.200822	0.697276	0.999827	SWE1	Protein kinase that regulates the G2/M transition by inhibition of Cdc28p kinase activity; localizes to the nucleus and to the daughter side of the mother-bud neck; homolog of S. pombe Wee1p; potential Cdc28p substrate
YGL065C	94.1003	-0.233797	0.349308	0.967178	94.1003	-0.0729978	0.489746	0.999906	94.1003	-0.160799	0.601551	0.999827	ALG2	Mannosyltransferase that catalyzes two consecutive steps in the N-linked glycosylation pathway; alg2 mutants exhibit temperature-sensitive growth and abnormal accumulation of the lipid-linked oligosaccharide Man2GlcNAc2-PP-Dol
YCL061C	52.4741	-0.0444854	0.455034	NA	52.4741	0.0207135	0.554237	0.999906	52.4741	-0.0651989	0.717094	0.999827	MRC1	S-phase checkpoint protein required for DNA replication; interacts with and stabilizes Pol2p at stalled replication forks during stress, where it forms a pausing complex with Tof1p and is phosphorylated by Mec1p; protects uncapped telomeres
YFL002C	67.3088	-0.228805	0.395997	0.982129	67.3088	0.540776	0.509005	0.999906	67.3088	-0.769581	0.644889	0.999827	SPB4	Putative ATP-dependent RNA helicase, nucleolar protein required for synthesis of 60S ribosomal subunits at a late step in the pathway; sediments with 66S pre-ribosomes in sucrose gradients
YPL101W	59.6257	-0.260681	0.401913	NA	59.6257	0.350365	0.520313	0.999906	59.6257	-0.611046	0.657455	0.999827	ELP4	Subunit of Elongator complex, which is required for modification of wobble nucleosides in tRNA; required for Elongator structural integrity
YOR346W	56.1497	-0.294499	0.432563	NA	56.1497	-0.723601	0.52164	0.999906	56.1497	0.429103	0.677662	0.999827	REV1	Deoxycytidyl transferase, forms a complex with the subunits of DNA polymerase zeta, Rev3p and Rev7p; involved in repair of abasic sites in damaged DNA
YOR188W	95.6154	-0.0938291	0.392554	0.992604	95.6154	-0.336876	0.490909	0.999906	95.6154	0.243047	0.628563	0.999827	MSB1	Protein involved in positive regulation of both 1,3-beta-glucan synthesis and the Pkc1p-MAPK pathway, potential Cdc28p substrate; multicopy suppressor of temperature-sensitive mutations in CDC24 and CDC42, and of mutations in BEM4
YOR247W	363.337	1.18318	0.329767	0.0807799	363.337	0.196528	0.431296	0.999906	363.337	0.986647	0.542917	0.999827	SRL1	Mannoprotein that exhibits a tight association with the cell wall, required for cell wall stability in the absence of GPI-anchored mannoproteins; has a high serine-threonine content; expression is induced in cell wall mutants
YLR424W	37.2042	-0.338883	0.489219	NA	37.2042	-0.351867	0.581449	0.999906	37.2042	0.0129843	0.759881	0.999827	SPP382	Essential protein that forms a dimer with Ntr2p; also forms a trimer, with Ntr2p and Prp43p, that is involved in spliceosome disassembly; found also in a multisubunit complex with the splicing factor Clf1p; suppressor of prp38-1 mutation
YGL120C	311.021	-0.189598	0.29778	0.971825	311.021	-0.0218178	0.403255	0.999906	311.021	-0.16778	0.501286	0.999827	PRP43	RNA helicase in the DEAH-box family, functions in both RNA polymerase I and polymerase II transcript metabolism, involved in release of the lariat-intron from the spliceosome
YDL088C	36.2596	-0.306348	0.498392	NA	36.2596	0.455372	0.576367	0.999906	36.2596	-0.761719	0.761947	0.999827	ASM4	Nuclear pore complex subunit, part of a subcomplex also containing Nup53p, Nup170p, and Pse1p
YNL280C	108.323	-0.210283	0.35614	0.979138	108.323	0.24962	0.475301	0.999906	108.323	-0.459903	0.593919	0.999827	ERG24	C-14 sterol reductase, acts in ergosterol biosynthesis; mutants accumulate the abnormal sterol ignosterol (ergosta-8,14 dienol), and are viable under anaerobic growth conditions but inviable on rich medium under aerobic conditions
YDL101C	54.8799	0.0214599	0.438455	NA	54.8799	-0.544343	0.544747	0.999906	54.8799	0.565803	0.699294	0.999827	DUN1	Cell-cycle checkpoint serine-threonine kinase required for DNA damage-induced transcription of certain target genes, phosphorylation of Rad55p and Sml1p, and transient G2/M arrest after DNA damage; also regulates postreplicative DNA repair
YBL042C	52.6359	-0.490002	0.467405	NA	52.6359	-0.230856	0.574551	0.999906	52.6359	-0.259146	0.740659	0.999827	FUI1	High affinity uridine permease, localizes to the plasma membrane; also mediates low but significant transport of the cytotoxic nucleoside analog 5-fluorouridine; not involved in uracil transport
YLR064W	38.0587	-0.684898	0.493774	NA	38.0587	0.692121	0.579686	0.999906	38.0587	-1.37702	0.761505	0.999827	PER33	Putative protein of unknown function; localizes to the endoplasmic reticulum with some nuclear pore complex association; highly conserved across species, orthologous to human TMEM33 and paralogous to Per33p; YLR064W is not an essential gene
YBR150C	34.1269	0.159586	0.478031	NA	34.1269	-0.341464	0.572131	0.999906	34.1269	0.50105	0.745557	0.999827	TBS1	Putative protein of unknown function; the authentic, non-tagged protein is detected in highly purified mitochondria in high-throughput studies
YLL011W	126.548	-0.384102	0.423043	0.959028	126.548	-0.213729	0.531962	0.999906	126.548	-0.170373	0.679669	0.999827	SOF1	Essential protein required for biogenesis of 40S (small) ribosomal subunit; has similarity to the beta subunit of trimeric G-proteins and the splicing factor Prp4p
YJL053W	38.3645	0.185577	0.481081	NA	38.3645	-0.171043	0.574276	0.999906	38.3645	0.356621	0.749141	0.999827	PEP8	Vacuolar protein sorting protein that forms part of the multimeric membrane-associated retromer complex along with Vps35p, Vps29p, Vps17p, and Vps5p; essential for endosome-to-Golgi retrograde protein transport
YGL092W	198.604	0.30641	0.304739	0.959028	198.604	-0.185323	0.397149	0.999906	198.604	0.491733	0.500592	0.999827	NUP145	Essential nucleoporin, catalyzes its own cleavage in vivo to generate a C-terminal fragment that assembles into the Nup84p subcomplex of the nuclear pore complex, and an N-terminal fragment of unknown function that is homologous to Nup100p
YGR274C	80.2358	-0.367428	0.371196	0.959028	80.2358	-0.128437	0.482504	0.999906	80.2358	-0.238991	0.608766	0.999827	TAF1	TFIID subunit (145 kDa), involved in RNA polymerase II transcription initiation; possesses in vitro histone acetyltransferase activity but its role in vivo appears to be minor; involved in promoter binding and G1/S progression
YPR031W	34.1784	0.203153	0.483898	NA	34.1784	-0.430455	0.566497	0.999906	34.1784	0.633609	0.745047	0.999827	NTO1	Subunit of the NuA3 histone acetyltransferase complex that acetylates histone H3; contains PHD finger domain that interacts with methylated histone H3
YHR079C	50.0096	0.550877	0.460819	NA	50.0096	-0.0828195	0.539662	0.999906	50.0096	0.633697	0.70962	0.999827	IRE1	Serine-threonine kinase and endoribonuclease; transmembrane protein that mediates the unfolded protein response (UPR) by regulating Hac1p synthesis through HAC1 mRNA splicing; Kar2p binds inactive Ire1p and releases from it upon ER stress
YAL058W	49.5015	0.1932	0.426667	NA	49.5015	0.128324	0.543872	0.999906	49.5015	0.0648761	0.69123	0.999827	CNE1	Calnexin; integral membrane ER chaperone involved in folding and quality control of glycoproteins; chaperone activity is inhibited by Mpd1p, with which Cne1p interacts; 24% identical to mammalian calnexin; Ca+ binding not yet shown in yeast
YCR072C	112.525	-0.182976	0.411719	0.992604	112.525	-0.162983	0.523789	0.999906	112.525	-0.0199931	0.666234	0.999827	RSA4	WD-repeat protein involved in ribosome biogenesis; may interact with ribosomes; required for maturation and efficient intra-nuclear transport or pre-60S ribosomal subunits, localizes to the nucleolus
YGL139W	108.417	0.0778165	0.384901	0.992604	108.417	-0.469184	0.498514	0.999906	108.417	0.547001	0.629817	0.999827	FLC3	Putative FAD transporter, similar to Flc1p and Flc2p; localized to the ER
YMR038C	142.813	-0.221442	0.34238	0.970619	142.813	-0.0693806	0.466237	0.999906	142.813	-0.152062	0.578446	0.999827	CCS1	Copper chaperone for superoxide dismutase Sod1p, involved in oxidative stress protection; Met-X-Cys-X2-Cys motif within the N-terminal portion is involved in insertion of copper into Sod1p under conditions of copper deprivation
YJL134W	72.9477	-0.261695	0.397234	0.967178	72.9477	-0.445775	0.508776	0.999906	72.9477	0.184081	0.645486	0.999827	LCB3	Long-chain base-1-phosphate phosphatase with specificity for dihydrosphingosine-1-phosphate, regulates ceramide and long-chain base phosphates levels, involved in incorporation of exogenous long chain bases in sphingolipids
YDR310C	121.499	-0.090486	0.345813	0.992604	121.499	0.325643	0.442261	0.999906	121.499	-0.416129	0.561404	0.999827	SUM1	Transcriptional repressor required for mitotic repression of middle sporulation-specific genes; also acts as general replication initiation factor; involved in telomere maintenance, chromatin silencing; regulated by pachytene checkpoint
YHL015W	1049.02	0.0131588	0.256337	0.993048	1049.02	-0.071886	0.350125	0.999906	1049.02	0.0850448	0.433931	0.999827	RPS20	Protein component of the small (40S) ribosomal subunit; overproduction suppresses mutations affecting RNA polymerase III-dependent transcription; has similarity to E. coli S10 and rat S20 ribosomal proteins
YMR319C	69.6344	-0.93744	0.446113	0.829774	69.6344	-0.673227	0.539875	0.999906	69.6344	-0.264213	0.70033	0.999827	FET4	Low-affinity Fe(II) transporter of the plasma membrane
YHR203C	2910.4	0.184634	0.40715	0.992604	2910.4	0.0240745	0.518221	0.999906	2910.4	0.160559	0.659033	0.999827	RPS4B	Protein component of the small (40S) ribosomal subunit; identical to Rps4Ap and has similarity to rat S4 ribosomal protein
YNL299W	43.9318	-0.385369	0.458678	NA	43.9318	-0.127843	0.558108	0.999906	43.9318	-0.257526	0.722404	0.999827	TRF5	Non-canonical poly(A) polymerase, involved in nuclear RNA degradation as a component of the TRAMP complex; catalyzes polyadenylation of hypomodified tRNAs, and snoRNA and rRNA precursors; overlapping but non-redundant functions with Pap2p
YFR033C	182.907	-0.378688	0.444562	0.959028	182.907	0.00534129	0.559632	0.999906	182.907	-0.384029	0.714718	0.999827	QCR6	Subunit 6 of the ubiquinol cytochrome-c reductase complex, which is a component of the mitochondrial inner membrane electron transport chain; highly acidic protein; required for maturation of cytochrome c1
YLR035C-A	213.578	-0.0473025	0.386626	0.992604	213.578	-0.137581	0.470584	0.999906	213.578	0.0902787	0.609039	0.999827		Retrotransposon TYA Gag and TYB Pol genes; polyprotein is processed to make a nucleocapsid-like protein (Gag), reverse transcriptase (RT), protease (PR), and integrase (IN); YLR035C-A is part of a mutant retrotransposon
YLR039C	80.0315	-0.126127	0.417312	0.992604	80.0315	0.084073	0.525162	0.999906	80.0315	-0.2102	0.670774	0.999827	RIC1	Protein involved in retrograde transport to the cis-Golgi network; forms heterodimer with Rgp1p that acts as a GTP exchange factor for Ypt6p; involved in transcription of rRNA and ribosomal protein genes
YIL173W	109.243	-0.473621	0.370759	0.959028	109.243	-0.195911	0.461188	0.999906	109.243	-0.27771	0.59174	0.999827	VTH1	Putative membrane glycoprotein with strong similarity to Vth2p and Pep1p/Vps10p, may be involved in vacuolar protein sorting
YER113C	71.1952	0.314675	0.4038	0.959028	71.1952	0.135532	0.495068	0.999906	71.1952	0.179142	0.638838	0.999827	TMN3	Protein with a role in cellular adhesion and filamentous growth; similar to Emp70p and Tmn2p; member of Transmembrane Nine family with 9 transmembrane segments; localizes to Golgi; induced by 8-methoxypsoralen plus UVA irradiation
YDR233C	377.837	0.401416	0.330346	0.959028	377.837	-0.149702	0.439936	0.999906	377.837	0.551118	0.550156	0.999827	RTN1	ER membrane protein that interacts with Sey1p to maintain ER morphology; interacts with exocyst subunit Sec6p, with Yip3p, and with Sbh1p; null mutant has an altered ER morphology; member of the RTNLA (reticulon-like A) subfamily
YML010W	591.81	-0.0653881	0.274024	0.992604	591.81	0.286808	0.37523	0.999906	591.81	-0.352196	0.464636	0.999827	SPT5	Protein involved in regulating Pol I and Pol II transcription and pre-mRNA processing; forms a complex with Spt4p; contains a C-terminal repeat domain that is a target for phosphorylation by Sgv1p
YOR119C	56.3644	-0.783902	0.428537	NA	56.3644	-0.222243	0.5369	0.999906	56.3644	-0.561659	0.686955	0.999827	RIO1	Essential serine kinase involved in cell cycle progression and processing of the 20S pre-rRNA into mature 18S rRNA
YDR516C	389.951	0.706485	0.385855	0.938199	389.951	0.659797	0.507713	0.999906	389.951	0.0466881	0.637685	0.999827	EMI2	Non-essential protein of unknown function required for transcriptional induction of the early meiotic-specific transcription factor IME1; required for sporulation; expression is regulated by glucose-repression transcription factors Mig1/2p
YKL171W	25.3737	0.416667	0.532491	NA	25.3737	0.0746895	0.596432	0.999906	25.3737	0.341978	0.79948	0.999827	NNK1	Protein kinase; implicated in proteasome function; interacts with TORC1, Ure2 and Gdh2; overexpression leads to hypersensitivity to rapamycin and nuclear accumulation of Gln3; epitope-tagged protein localizes to the cytoplasm
YLR192C	432.895	0.124084	0.29156	0.992604	432.895	0.061836	0.397583	0.999906	432.895	0.0622479	0.49303	0.999827	HCR1	Dual function protein involved in translation initiation as a substoichiometric component (eIF3j) of translation initiation factor 3 (eIF3) and required for processing of 20S pre-rRNA; binds to eIF3 subunits Rpg1p and Prt1p and 18S rRNA
YPL019C	84.5801	0.283581	0.391289	0.967178	84.5801	-0.151105	0.501254	0.999906	84.5801	0.434686	0.635889	0.999827	VTC3	Subunit of the vacuolar transporter chaperone (VTC) complex involved in membrane trafficking, vacuolar polyphosphate accumulation, microautophagy and non-autophagic vacuolar fusion
YIL014W	51.7763	-0.554698	0.451014	NA	51.7763	0.351067	0.551696	0.999906	51.7763	-0.905765	0.712594	0.999827	MNT3	Alpha-1,3-mannosyltransferase, adds the fourth and fifth alpha-1,3-linked mannose residues to O-linked glycans during protein O-glycosylation
YBL097W	77.3037	-0.59411	0.383637	0.959028	77.3037	-0.626363	0.493312	0.999906	77.3037	0.0322525	0.624925	0.999827	BRN1	Subunit of the condensin complex; required for chromosome condensation and for clustering of tRNA genes at the nucleolus; may influence multiple aspects of chromosome transmission
YGR098C	73.3005	-0.234183	0.43338	0.986131	73.3005	-0.00700526	0.520556	0.999906	73.3005	-0.227177	0.677343	0.999827	ESP1	Separase, a caspase-like cysteine protease that promotes sister chromatid separation by mediating dissociation of the cohesin Scc1p from chromatin; inhibits protein phosphatase 2A-Cdc55p to promote mitotic exit; inhibited by Pds1p
YGR177C	31.0052	-0.919226	0.590089	NA	31.0052	-0.553253	0.638994	0.999906	31.0052	-0.365973	0.869763	0.999827	ATF2	Alcohol acetyltransferase, may play a role in steroid detoxification; forms volatile esters during fermentation, which is important for brewing and winemaking
YLR291C	116.435	0.10012	0.361133	0.992604	116.435	-0.297021	0.466669	0.999906	116.435	0.397141	0.590083	0.999827	GCD7	Beta subunit of the translation initiation factor eIF2B, the guanine-nucleotide exchange factor for eIF2; activity subsequently regulated by phosphorylated eIF2; first identified as a negative regulator of GCN4 expression
YMR092C	290.412	0.341792	0.300003	0.959028	290.412	0.627062	0.416289	0.999906	290.412	-0.285271	0.513116	0.999827	AIP1	Actin cortical patch component, interacts with the actin depolymerizing factor cofilin; required to restrict cofilin localization to cortical patches; contains WD repeats
YOR090C	50.9625	-0.179701	0.453088	NA	50.9625	0.415494	0.558843	0.999906	50.9625	-0.595195	0.719414	0.999827	PTC5	Mitochondrial type 2C protein phosphatase (PP2C) involved in regulation of pyruvate dehydrogenase activity by dephosphorylating the serine 133 of the Pda1p subunit; acts in concert with kinases Pkp1p and Pkp2p and phosphatase Ptc6p
YKL117W	805.626	-0.136983	0.335041	0.992604	805.626	0.194326	0.45097	0.999906	805.626	-0.331309	0.561806	0.999827	SBA1	Co-chaperone that binds to and regulates Hsp90 family chaperones; important for pp60v-src activity in yeast; homologous to the mammalian p23 proteins and like p23 can regulate telomerase activity
YBR172C	117.615	-0.452209	0.378533	0.959028	117.615	-0.393033	0.47361	0.999906	117.615	-0.0591755	0.606295	0.999827	SMY2	Protein of unknown function involved in COPII vesicle formation; interacts with the Sec23p/Sec24p subcomplex; overexpression suppresses the temperature sensitivity of a myo2 mutant; has similarity to S. pombe Mpd2
YNL233W	49.5358	0.0302002	0.429051	NA	49.5358	0.422981	0.535617	0.999906	49.5358	-0.39278	0.686239	0.999827	BNI4	Targeting subunit for Glc7p protein phosphatase, localized to the bud neck, required for localization of chitin synthase III to the bud neck via interaction with the chitin synthase III regulatory subunit Skt5p
YOL113W	22.6145	-0.474838	0.557421	NA	22.6145	-0.461528	0.610332	0.999906	22.6145	-0.0133103	0.826573	0.999827	SKM1	Member of the PAK family of serine/threonine protein kinases with similarity to Ste20p and Cla4p; involved in down-regulation of sterol uptake; proposed to be a downstream effector of Cdc42p during polarized growth
YPL190C	298.309	-0.607849	0.384646	0.959028	298.309	0.131063	0.498133	0.999906	298.309	-0.738912	0.629356	0.999827	NAB3	Single stranded RNA binding protein; acidic ribonucleoprotein; required for termination of non-poly(A) transcripts and efficient splicing; interacts with Nrd1p
YBL079W	193.538	0.0604783	0.327821	0.992604	193.538	0.0237264	0.427817	0.999906	193.538	0.0367519	0.538973	0.999827	NUP170	Subunit of the nuclear pore complex (NPC), required for NPC localization of specific nucleoporins; involved in nuclear envelope permeability and chromosome segregation; has similar to Nup157p; essential role, with Nup157p, in NPC assembly
YMR242C	2007.76	0.474025	0.354811	0.959028	2007.76	-0.0305443	0.465355	0.999906	2007.76	0.504569	0.585188	0.999827	RPL20A	Protein component of the large (60S) ribosomal subunit, nearly identical to Rpl20Bp and has similarity to rat L18a ribosomal protein
YMR290C	240.248	-0.0986317	0.302712	0.992604	240.248	-0.306872	0.409771	0.999906	240.248	0.20824	0.509458	0.999827	HAS1	ATP-dependent RNA helicase; localizes to both the nuclear periphery and nucleolus; highly enriched in nuclear pore complex fractions; constituent of 66S pre-ribosomal particles
YML111W	84.2735	-0.123419	0.400461	0.992604	84.2735	-0.246575	0.493441	0.999906	84.2735	0.123156	0.635494	0.999827	BUL2	Component of the Rsp5p E3-ubiquitin ligase complex, involved in intracellular amino acid permease sorting, functions in heat shock element mediated gene expression, essential for growth in stress conditions, functional homolog of BUL1
YER056C	199.617	-0.352005	0.33241	0.959028	199.617	-0.559395	0.441317	0.999906	199.617	0.207391	0.552501	0.999827	FCY2	Purine-cytosine permease, mediates purine (adenine, guanine, and hypoxanthine) and cytosine accumulation
YKL034W	43.1862	0.32557	0.459564	NA	43.1862	0.511167	0.566225	0.999906	43.1862	-0.185597	0.729131	0.999827	TUL1	Golgi-localized RING-finger ubiquitin ligase (E3), involved in ubiquitinating and sorting membrane proteins that contain polar transmembrane domains to multivesicular bodies for delivery to the vacuole for quality control purposes
YLR154C-G	82.565	-0.474148	0.507404	0.959028	82.565	1.78515	0.601792	0.999906	82.565	-2.25929	0.787155	0.999827		Putative protein of unknown function identified by fungal homology comparisons and RT-PCR; this ORF is contained within RDN25-2 and RDN37-2
YBR015C	325.795	0.0806692	0.302395	0.992604	325.795	0.417844	0.405701	0.999906	325.795	-0.337175	0.505998	0.999827	MNN2	Alpha-1,2-mannosyltransferase, responsible for addition of the first alpha-1,2-linked mannose to form the branches on the mannan backbone of oligosaccharides, localizes to an early Golgi compartment
YOL030W	494.761	0.280966	0.302718	0.959028	494.761	-0.171114	0.410664	0.999906	494.761	0.45208	0.510179	0.999827	GAS5	1,3-beta-glucanosyltransferase, has similarity to Gas1p; localizes to the cell wall
YMR218C	67.6869	0.0231237	0.42546	0.992952	67.6869	-0.490029	0.521198	0.999906	67.6869	0.513153	0.672811	0.999827	TRS130	One of 10 subunits of the transport protein particle (TRAPP) complex of the cis-Golgi which mediates vesicle docking and fusion; involved in ER to Golgi membrane traffic; mutation activates transcription of OCH1
YIL036W	65.5179	0.525444	0.404949	NA	65.5179	-0.102406	0.50882	0.999906	65.5179	0.62785	0.650273	0.999827	CST6	Basic leucine zipper (bZIP) transcription factor of the ATF/CREB family, proposed to be a regulator of oleate responsive genes; involved in utilization of non-optimal carbon sources and chromosome stability
YDR046C	337.741	0.0356123	0.310714	0.992604	337.741	0.236892	0.414911	0.999906	337.741	-0.20128	0.518356	0.999827	BAP3	Amino acid permease involved in the uptake of cysteine, leucine, isoleucine and valine
YGL083W	42.8452	-0.0885952	0.460109	NA	42.8452	-0.822298	0.555091	0.999906	42.8452	0.733703	0.721021	0.999827	SCY1	Putative kinase, suppressor of GTPase mutant, similar to bovine rhodopsin kinase
YKL007W	110.882	0.326649	0.370977	0.959028	110.882	0.348126	0.493344	0.999906	110.882	-0.0214765	0.617235	0.999827	CAP1	Alpha subunit of the capping protein (CP) heterodimer (Cap1p and Cap2p) which binds to the barbed ends of actin filaments preventing further polymerization; localized predominantly to cortical actin patches
YKL106W	49.6154	-0.0381433	0.474809	NA	49.6154	0.0369264	0.574428	0.999906	49.6154	-0.0750697	0.74525	0.999827	AAT1	Mitochondrial aspartate aminotransferase, catalyzes the conversion of oxaloacetate to aspartate in aspartate and asparagine biosynthesis
YPR103W	199.87	-0.0976738	0.347043	0.992604	199.87	0.521256	0.465657	0.999906	199.87	-0.618929	0.580749	0.999827	PRE2	Beta 5 subunit of the 20S proteasome, responsible for the chymotryptic activity of the proteasome
YNL323W	92.6939	-0.233621	0.387814	0.979138	92.6939	-0.111654	0.504425	0.999906	92.6939	-0.121967	0.636273	0.999827	LEM3	Membrane protein of the plasma membrane and ER, interacts specifically in vivo with the phospholipid translocase (flippase) Dnf1p; involved in translocation of phospholipids and alkylphosphocholine drugs across the plasma membrane
YLR262C-A	87.3686	0.106866	0.385384	0.992604	87.3686	0.0799658	0.503169	0.999906	87.3686	0.0268998	0.633792	0.999827	TMA7	Protein of unknown that associates with ribosomes; null mutant exhibits translation defects, altered polyribosome profiles, and resistance to the translation inhibitor anisomcyin
YFR044C	683.777	0.319658	0.294642	0.959028	683.777	0.0983456	0.402484	0.999906	683.777	0.221312	0.498805	0.999827	DUG1	Cys-Gly metallo-di-peptidase; forms a complex with Dug2p and Dug3p to degrade glutathione (GSH) and other peptides containing a gamma-glu-X bond in an alternative pathway to GSH degradation by gamma-glutamyl transpeptidase (Ecm38p)
YLR309C	159.535	-0.282266	0.32295	0.959028	159.535	-0.166091	0.425435	0.999906	159.535	-0.116175	0.534126	0.999827	IMH1	Protein involved in vesicular transport, mediates transport between an endosomal compartment and the Golgi, contains a Golgi-localization (GRIP) domain that interacts with activated Arl1p-GTP to localize Imh1p to the Golgi
YIL041W	436.35	0.206052	0.296141	0.967178	436.35	0.443808	0.40362	0.999906	436.35	-0.237757	0.500606	0.999827	GVP36	BAR domain-containing protein that localizes to both early and late Golgi vesicles; required for adaptation to varying nutrient concentrations, fluid-phase endocytosis, polarization of the actin cytoskeleton, and vacuole biogenesis
YDR200C	32.7774	0.746655	0.531875	NA	32.7774	0.889274	0.60381	0.999906	32.7774	-0.142618	0.804443	0.999827	VPS64	Protein required for cytoplasm to vacuole targeting of proteins; forms a complex with Far3p and Far7p to Far11p involved in recovery from pheromone-induced cell cycle arrest; mutant has increased aneuploidy tolerance
YIL140W	80.7959	0.429103	0.448214	0.959028	80.7959	0.306094	0.551816	0.999906	80.7959	0.12301	0.710903	0.999827	AXL2	Integral plasma membrane protein required for axial budding in haploid cells, localizes to the incipient bud site and bud neck; glycosylated by Pmt4p; potential Cdc28p substrate
YMR029C	51.8885	0.323884	0.444084	NA	51.8885	-0.390515	0.550103	0.999906	51.8885	0.714399	0.70699	0.999827	FAR8	Protein involved in recovery from cell cycle arrest in response to pheromone, in a Far1p-independent pathway; interacts with Far3p, Far7p, Far9p, Far10p, and Far11p
YKL205W	132.656	-0.027551	0.35998	0.992604	132.656	-0.285325	0.468735	0.999906	132.656	0.257774	0.591014	0.999827	LOS1	Nuclear pore protein involved in nuclear export of pre-tRNA and in re-export of mature tRNAs after their retrograde import from the cytoplasm
YJL060W	108.678	0.403553	0.384308	0.959028	108.678	0.54295	0.520607	0.999906	108.678	-0.139397	0.647032	0.999827	BNA3	Kynurenine aminotransferase, catalyzes formation of kynurenic acid from kynurenine; potential Cdc28p substrate
YML001W	132.045	0.186637	0.356583	0.987757	132.045	0.0468422	0.480369	0.999906	132.045	0.139795	0.598245	0.999827	YPT7	Rab family GTPase; GTP-binding protein of the rab family; required for homotypic fusion event in vacuole inheritance, for endosome-endosome fusion, similar to mammalian Rab7
YML100W	754.05	0.500844	0.602648	0.959028	754.05	0.236759	0.645859	0.999906	754.05	0.264085	0.883356	0.999827	TSL1	Large subunit of trehalose 6-phosphate synthase (Tps1p)/phosphatase (Tps2p) complex, which converts uridine-5'-diphosphoglucose and glucose 6-phosphate to trehalose, similar to Tps3p and may share function; mutant has aneuploidy tolerance
YDR345C	1118.32	0.705859	0.298497	0.735749	1118.32	0.964064	0.404631	0.999906	1118.32	-0.258205	0.502817	0.999827	HXT3	Low affinity glucose transporter of the major facilitator superfamily, expression is induced in low or high glucose conditions
YLR183C	78.4341	0.610286	0.433951	0.959028	78.4341	0.600264	0.537652	0.999906	78.4341	0.0100222	0.690903	0.999827	TOS4	Forkhead Associated domain containing protein and putative transcription factor found associated with chromatin; target of SBF transcription factor; expression is periodic and peaks in G1; similar to PLM2
YDR507C	197.93	-0.309087	0.331602	0.959028	197.93	0.0373512	0.439178	0.999906	197.93	-0.346439	0.550306	0.999827	GIN4	Protein kinase involved in bud growth and assembly of the septin ring, proposed to have kinase-dependent and kinase-independent activities; undergoes autophosphorylation; similar to Kcc4p and Hsl1p
YKL142W	170.132	0.150643	0.391125	0.992604	170.132	0.230329	0.511295	0.999906	170.132	-0.0796855	0.643735	0.999827	MRP8	Protein of unknown function; undergoes sumoylation; transcription induced under cell wall stress; protein levels are reduced under anaerobic conditions; originally thought to be a mitochondrial ribosomal protein based on sequence analysis
YIL005W	97.6526	-0.366786	0.349616	0.959028	97.6526	-0.366386	0.464495	0.999906	97.6526	-0.000400709	0.581366	0.999827	EPS1	ER protein with chaperone and co-chaperone activity, involved in retention of resident ER proteins; has a role in recognizing proteins targeted for ER-associated degradation (ERAD), member of the protein disulfide isomerase family
YGR188C	30.6649	-0.0335944	0.495237	NA	30.6649	-0.454318	0.578899	0.999906	30.6649	0.420724	0.761838	0.999827	BUB1	Protein kinase that forms a complex with Mad1p and Bub3p that is crucial in the checkpoint mechanism required to prevent cell cycle progression into anaphase in the presence of spindle damage, associates with centromere DNA via Skp1p
YBR260C	50.8078	-0.0875076	0.426007	NA	50.8078	0.011443	0.532097	0.999906	50.8078	-0.0989506	0.681607	0.999827	RGD1	GTPase-activating protein (RhoGAP) for Rho3p and Rho4p, possibly involved in control of actin cytoskeleton organization
YNL103W	65.1394	0.354831	0.441939	NA	65.1394	0.0473354	0.52988	0.999906	65.1394	0.307495	0.68997	0.999827	MET4	Leucine-zipper transcriptional activator, responsible for the regulation of the sulfur amino acid pathway, requires different combinations of the auxiliary factors Cbf1p, Met28p, Met31p and Met32p
YOR081C	62.494	0.274042	0.404442	NA	62.494	-0.310774	0.51684	0.999906	62.494	0.584816	0.656277	0.999827	TGL5	Bifunction enzyme with triacylglycerol lipase and lysophosphatidic acid acyltransferase activity; involved in triacylglycerol mobilization; localizes to lipid particles; potential Cdc28p substrate
YKL160W	69.6221	-0.139924	0.393166	0.992604	69.6221	-0.372533	0.518869	0.999906	69.6221	0.232608	0.651005	0.999827	ELF1	Transcription elongation factor that contains a conserved zinc finger domain; implicated in the maintenance of proper chromatin structure in actively transcribed regions; deletion inhibits Brome mosaic virus (BMV) gene expression
YAR007C	165.99	0.287268	0.319733	0.959028	165.99	0.466864	0.429069	0.999906	165.99	-0.179596	0.535085	0.999827	RFA1	Subunit of heterotrimeric Replication Protein A (RPA), which is a highly conserved single-stranded DNA binding protein involved in DNA replication, repair, and recombination
YCR005C	316.636	0.0503375	0.429771	0.992604	316.636	-0.391894	0.525509	0.999906	316.636	0.442231	0.678869	0.999827	CIT2	Citrate synthase, catalyzes the condensation of acetyl coenzyme A and oxaloacetate to form citrate, peroxisomal isozyme involved in glyoxylate cycle; expression is controlled by Rtg1p and Rtg2p transcription factors
YLR028C	455.329	0.245057	0.284796	0.959028	455.329	0.00439214	0.388017	0.999906	455.329	0.240664	0.481316	0.999827	ADE16	Enzyme of 'de novo' purine biosynthesis containing both 5-aminoimidazole-4-carboxamide ribonucleotide transformylase and inosine monophosphate cyclohydrolase activities, isozyme of Ade17p; ade16 ade17 mutants require adenine and histidine
YPR165W	558.054	-0.426021	0.3659	0.959028	558.054	0.123054	0.480219	0.999906	558.054	-0.549075	0.603732	0.999827	RHO1	GTP-binding protein of the rho subfamily of Ras-like proteins, involved in establishment of cell polarity; regulates protein kinase C (Pkc1p) and the cell wall synthesizing enzyme 1,3-beta-glucan synthase (Fks1p and Gsc2p)
YIL162W	85.6566	-0.239738	0.371469	0.970619	85.6566	-0.154054	0.484322	0.999906	85.6566	-0.0856839	0.610373	0.999827	SUC2	Invertase, sucrose hydrolyzing enzyme; a secreted, glycosylated form is regulated by glucose repression, and an intracellular, nonglycosylated enzyme is produced constitutively
YDR266C	73.8447	0.288608	0.410944	0.967178	73.8447	-0.551745	0.501208	0.999906	73.8447	0.840353	0.648151	0.999827		Protein of unknown function that may interact with ribosomes, based on co-purification experiments;green fluorescent protein (GFP)-fusion protein localizes to the cytoplasm; contains a RING finger domain
YJL042W	177.657	0.0867855	0.35215	0.992604	177.657	-0.0953763	0.457226	0.999906	177.657	0.182162	0.577116	0.999827	MHP1	Microtubule-associated protein involved in assembly and stabilization of microtubules; overproduction results in cell cycle arrest at G2 phase; similar to Drosophila protein MAP and to mammalian MAP4 proteins
YJL191W	435.116	-0.177261	0.310178	0.982129	435.116	-0.116207	0.415947	0.999906	435.116	-0.0610539	0.518867	0.999827	RPS14B	Ribosomal protein 59 of the small subunit, required for ribosome assembly and 20S pre-rRNA processing; mutations confer cryptopleurine resistance; nearly identical to Rps14Ap and similar to E. coli S11 and rat S14 ribosomal proteins
YER047C	40.6548	-0.166892	0.468326	NA	40.6548	0.16568	0.560592	0.999906	40.6548	-0.332572	0.730459	0.999827	SAP1	Putative ATPase of the AAA family, interacts with the Sin1p transcriptional repressor in the two-hybrid system
YJL143W	153.203	0.103755	0.34972	0.992604	153.203	0.057635	0.474241	0.999906	153.203	0.0461199	0.589239	0.999827	TIM17	Essential subunit of the Translocase of the Inner Mitochondrial membrane (TIM23 complex); with Tim23p, contributes to the architecture and function of the import channel; may link the import motor to the core TIM23 complex
YKL190W	97.996	0.170289	0.405875	0.992604	97.996	0.493578	0.523492	0.999906	97.996	-0.323289	0.662385	0.999827	CNB1	Calcineurin B; the regulatory subunit of calcineurin, a Ca++/calmodulin-regulated type 2B protein phosphatase which regulates Crz1p (a stress-response transcription factor), the other calcineurin subunit is encoded by CNA1 and/or CMP1
YBR026C	86.3893	0.0539576	0.43888	0.992604	86.3893	0.475941	0.561876	0.999906	86.3893	-0.421983	0.712945	0.999827	ETR1	2-enoyl thioester reductase, member of the medium chain dehydrogenase/reductase family; localized to in mitochondria, where it has a probable role in fatty acid synthesis
YBR127C	1936.4	0.0121656	0.262233	0.993048	1936.4	0.257329	0.358897	0.999906	1936.4	-0.245163	0.444492	0.999827	VMA2	Subunit B of the eight-subunit V1 peripheral membrane domain of the vacuolar H+-ATPase (V-ATPase), an electrogenic proton pump found throughout the endomembrane system; contains nucleotide binding sites; also detected in the cytoplasm
YMR308C	459.376	0.173037	0.283828	0.979138	459.376	0.243024	0.380401	0.999906	459.376	-0.0699865	0.474618	0.999827	PSE1	Karyopherin/importin that interacts with the nuclear pore complex; acts as the nuclear import receptor for specific proteins, including Pdr1p, Yap1p, Ste12p, and Aft1p
YHL004W	51.8822	-0.104602	0.435884	NA	51.8822	-0.244086	0.548737	0.999906	51.8822	0.139484	0.700789	0.999827	MRP4	Mitochondrial ribosomal protein of the small subunit
YNL288W	71.5006	-0.451053	0.398232	0.959028	71.5006	-0.493512	0.507122	0.999906	71.5006	0.042459	0.644796	0.999827	CAF40	Evolutionarily conserved subunit of the CCR4-NOT complex involved in controlling mRNA initiation, elongation and degradation; binds Cdc39p
YMR209C	36.8343	-0.389899	0.501148	NA	36.8343	0.155734	0.587654	0.999906	36.8343	-0.545633	0.772321	0.999827		Putative S-adenosylmethionine-dependent methyltransferase; YMR209C is not an essential gene
YIL126W	262.892	-0.447217	0.291675	0.959028	262.892	-0.0236632	0.390399	0.999906	262.892	-0.423554	0.487324	0.999827	STH1	ATPase component of the RSC chromatin remodeling complex; required for expression of early meiotic genes; essential helicase-related protein homologous to Snf2p
YBL093C	32.5665	-0.111063	0.503762	NA	32.5665	-6.85723e-05	0.579777	0.999906	32.5665	-0.110995	0.768043	0.999827	ROX3	Subunit of the RNA polymerase II mediator complex; associates with core polymerase subunits to form the RNA polymerase II holoenzyme
YGL179C	32.5415	0.572029	0.496707	NA	32.5415	-0.0525586	0.577105	0.999906	32.5415	0.624588	0.761385	0.999827	TOS3	Protein kinase, related to and functionally redundant with Elm1p and Sak1p for the phosphorylation and activation of Snf1p; functionally orthologous to LKB1, a mammalian kinase associated with Peutz-Jeghers cancer-susceptibility syndrome
YCR032W	57.031	0.172041	0.442604	NA	57.031	-0.558179	0.528521	0.999906	57.031	0.730219	0.689388	0.999827	BPH1	PProtein homologous to human Chediak-Higashi syndrome and murine Beige proteins, which are implicated in disease syndromes due to defective lysosomal trafficking; mutant phenotype and genetic interactions suggest a role in protein sorting
YGR234W	197.393	0.0762351	0.379716	0.992604	197.393	-0.217276	0.494187	0.999906	197.393	0.293511	0.62322	0.999827	YHB1	Nitric oxide oxidoreductase, flavohemoglobin involved in nitric oxide detoxification; plays a role in the oxidative and nitrosative stress responses
YOL052C	86.7172	0.0344482	0.362196	0.992604	86.7172	-0.214957	0.479874	0.999906	86.7172	0.249405	0.601218	0.999827	SPE2	S-adenosylmethionine decarboxylase, required for the biosynthesis of spermidine and spermine; cells lacking Spe2p require spermine or spermidine for growth in the presence of oxygen but not when grown anaerobically
YKL056C	2102.19	0.0994669	0.258006	0.992604	2102.19	0.0276005	0.351916	0.999906	2102.19	0.0718664	0.436362	0.999827	TMA19	Protein that associates with ribosomes; homolog of translationally controlled tumor protein; green fluorescent protein (GFP)-fusion protein localizes to the cytoplasm and relocates to the mitochondrial outer surface upon oxidative stress
YER070W	1534.03	0.313158	0.361928	0.959028	1534.03	0.369598	0.472079	0.999906	1534.03	-0.0564397	0.594853	0.999827	RNR1	Major isoform of the large subunit of ribonucleotide-diphosphate reductase; the RNR complex catalyzes rate-limiting step in dNTP synthesis, regulated by DNA replication and DNA damage checkpoint pathways via localization of small subunits
YDR035W	438.824	0.551827	0.309596	0.959028	438.824	0.3862	0.418282	0.999906	438.824	0.165627	0.520391	0.999827	ARO3	3-deoxy-D-arabino-heptulosonate-7-phosphate (DAHP) synthase, catalyzes the first step in aromatic amino acid biosynthesis and is feedback-inhibited by phenylalanine or high concentration of tyrosine or tryptophan
YLR439W	68.2229	-0.651259	0.484525	0.959028	68.2229	-0.334026	0.582152	0.999906	68.2229	-0.317233	0.757407	0.999827	MRPL4	Mitochondrial ribosomal protein of the large subunit
YBR110W	64.1963	-0.220941	0.402252	NA	64.1963	0.310611	0.539351	0.999906	64.1963	-0.531552	0.67282	0.999827	ALG1	Mannosyltransferase, involved in asparagine-linked glycosylation in the endoplasmic reticulum (ER); essential for viability, mutation is functionally complemented by human ortholog
YLR196W	433.317	-0.218717	0.378728	0.982129	433.317	-0.166542	0.491943	0.999906	433.317	-0.0521749	0.62084	0.999827	PWP1	Protein with WD-40 repeats involved in rRNA processing; associates with trans-acting ribosome biogenesis factors; similar to beta-transducin superfamily
YOR195W	92.7004	-0.15796	0.378351	0.992604	92.7004	0.178563	0.482188	0.999906	92.7004	-0.336523	0.612902	0.999827	SLK19	Kinetochore-associated protein required for normal segregation of chromosomes in meiosis and mitosis; component of the FEAR regulatory network, which promotes Cdc14p release from the nucleolus during anaphase; potential Cdc28p substrate
YLL051C	77.2401	0.165597	0.443313	0.992604	77.2401	0.101197	0.526817	0.999906	77.2401	0.0644003	0.688513	0.999827	FRE6	Putative ferric reductase with similarity to Fre2p; expression induced by low iron levels
YNL251C	263.682	0.451494	0.300517	0.959028	263.682	0.125881	0.401182	0.999906	263.682	0.325612	0.501253	0.999827	NRD1	RNA-binding protein that interacts with the C-terminal domain of the RNA polymerase II large subunit (Rpo21p), preferentially at phosphorylated Ser5; required for transcription termination and 3' end maturation of nonpolyadenylated RNAs
YNL134C	183.319	0.351622	0.396743	0.959028	183.319	0.777166	0.524249	0.999906	183.319	-0.425543	0.65741	0.999827		Putative protein of unknown function with similarity to dehydrogenases from other model organisms; green fluorescent protein (GFP)-fusion protein localizes to both the cytoplasm and nucleus and is induced by the DNA-damaging agent MMS
YDR152W	106.505	-0.28198	0.35805	0.959028	106.505	0.0172331	0.47323	0.999906	106.505	-0.299213	0.593418	0.999827	GIR2	Highly-acidic cytoplasmic RWD domain-containing protein of unknown function; forms a complex with Rbg2p; interacts with Rbg1p and Gcn1p; associates with translating ribosomes; putative intrinsically unstructured protein
YLR079W	37.4628	-0.933442	0.532648	NA	37.4628	-0.296107	0.613492	0.999906	37.4628	-0.637335	0.812456	0.999827	SIC1	Inhibitor of Cdc28-Clb kinase complexes that controls G1/S phase transition, preventing premature S phase and ensuring genomic integrity; phosphorylation targets Sic1p for SCF(CDC4)-dependent turnover; functional homolog of mammalian Kip1
YOL016C	90.6663	0.0154042	0.369265	0.995057	90.6663	-0.256741	0.50131	0.999906	90.6663	0.272145	0.622629	0.999827	CMK2	Calmodulin-dependent protein kinase; may play a role in stress response, many CA++/calmodulan dependent phosphorylation substrates demonstrated in vitro, amino acid sequence similar to Cmk1p and mammalian Cam Kinase II
YGR270W	165.599	0.00907023	0.331942	0.996693	165.599	0.296644	0.431745	0.999906	165.599	-0.287574	0.544594	0.999827	YTA7	Protein that localizes to chromatin and has a role in regulation of histone gene expression; has a bromodomain-like region that interacts with the N-terminal tail of histone H3, and an ATPase domain; potentially phosphorylated by Cdc28p
YLR394W	17.5563	-0.403235	0.623051	NA	17.5563	-0.00642244	0.643019	0.999906	17.5563	-0.396813	0.895354	0.999827	CST9	SUMO E3 ligase; required for synaptonemal complex formation; localizes to synapsis initiation sites on meiotic chromosomes; potential Cdc28p substrate
YJL130C	2044.52	0.0423746	0.266435	0.992604	2044.52	-0.0411143	0.362216	0.999906	2044.52	0.0834889	0.449653	0.999827	URA2	Bifunctional carbamoylphosphate synthetase (CPSase)-aspartate transcarbamylase (ATCase), catalyzes the first two enzymatic steps in the de novo biosynthesis of pyrimidines; both activities are subject to feedback inhibition by UTP
YHL011C	206.435	-0.133105	0.331936	0.992604	206.435	0.142924	0.443644	0.999906	206.435	-0.276029	0.554076	0.999827	PRS3	5-phospho-ribosyl-1(alpha)-pyrophosphate synthetase, synthesizes PRPP, which is required for nucleotide, histidine, and tryptophan biosynthesis; one of five related enzymes, which are active as heteromultimeric complexes
YER171W	74.7268	0.03724	0.38257	0.992604	74.7268	-0.158075	0.484531	0.999906	74.7268	0.195315	0.617354	0.999827	RAD3	5' to 3' DNA helicase, involved in nucleotide excision repair and transcription; subunit of RNA polII initiation factor TFIIH and of Nucleotide Excision Repair Factor 3 (NEF3); homolog of human XPD protein; mutant has aneuploidy tolerance
YMR179W	41.3462	0.179379	0.488761	NA	41.3462	-0.10923	0.580141	0.999906	41.3462	0.288608	0.758575	0.999827	SPT21	Protein with a role in transcriptional silencing; required for normal transcription at several loci including HTA2-HTB2 and HHF2-HHT2, but not required at the other histone loci; functionally related to Spt10p
YDR251W	106.216	-0.259667	0.36815	0.967178	106.216	0.220909	0.469607	0.999906	106.216	-0.480575	0.596708	0.999827	PAM1	Essential protein of unknown function; exhibits variable expression during colony morphogenesis; overexpression permits survival without protein phosphatase 2A, inhibits growth, and induces a filamentous phenotype
YOR296W	36.0555	-0.593223	0.51848	NA	36.0555	0.0317618	0.600863	0.999906	36.0555	-0.624985	0.793641	0.999827		Putative protein of unknown function; green fluorescent protein (GFP)-fusion protein localizes to the cytoplasm; expressed during copper starvation; YOR296W is not an essential gene
YCL038C	44.4336	0.859895	0.466285	NA	44.4336	-0.00286585	0.561095	0.999906	44.4336	0.862761	0.729508	0.999827	ATG22	Vacuolar integral membrane protein required for efflux of amino acids during autophagic body breakdown in the vacuole; null mutation causes a gradual loss of viability during starvation
YJL156C	37.4206	0.10022	0.48029	NA	37.4206	-0.0206845	0.576415	0.999906	37.4206	0.120905	0.750261	0.999827	SSY5	Serine protease of SPS plasma membrane amino acid sensor system (Ssy1p-Ptr3p-Ssy5p); contains an inhibitory domain that dissociates in response to extracellular amino acids, freeing a catalytic domain to activate transcription factor Stp1p
YML115C	154.606	-0.406377	0.33346	0.959028	154.606	-0.144756	0.451219	0.999906	154.606	-0.261621	0.561065	0.999827	VAN1	Component of the mannan polymerase I, which contains Van1p and Mnn9p and is involved in the first steps of mannan synthesis; mutants are vanadate-resistant
YGL078C	240.536	-0.579173	0.375048	0.959028	240.536	-0.190924	0.490768	0.999906	240.536	-0.388248	0.617669	0.999827	DBP3	Putative ATP-dependent RNA helicase of the DEAD-box family involved in ribosomal biogenesis
YHR219W	27.7324	0.41245	0.594967	NA	27.7324	0.559165	0.626968	0.999906	27.7324	-0.146715	0.864184	0.999827		Putative protein of unknown function with similarity to helicases; located in the telomere region on the right arm of chromosome VIII
YKL113C	88.1616	0.23135	0.409358	0.982129	88.1616	0.472852	0.530751	0.999906	88.1616	-0.241502	0.670261	0.999827	RAD27	5' to 3' exonuclease, 5' flap endonuclease, required for Okazaki fragment processing and maturation as well as for long-patch base-excision repair; member of the S. pombe RAD2/FEN1 family
YER016W	59.6613	0.311357	0.429031	NA	59.6613	0.559204	0.548286	0.999906	59.6613	-0.247847	0.696137	0.999827	BIM1	Microtubule-binding protein that together with Kar9p makes up the cortical microtubule capture site and delays the exit from mitosis when the spindle is oriented abnormally
YGR014W	198.454	-0.0206498	0.348619	0.992952	198.454	0.0238362	0.443137	0.999906	198.454	-0.044486	0.56383	0.999827	MSB2	Mucin family member involved in the Cdc42p- and MAP kinase-dependent filamentous growth signaling pathway; also functions as an osmosensor in parallel to the Sho1p-mediated pathway; potential Cdc28p substrate
YOL070C	116.328	-0.737215	0.447305	0.959028	116.328	-0.20607	0.560352	0.999906	116.328	-0.531145	0.716992	0.999827	NBA1	Protein of unknown function, localizes to the bud neck and cytoplasm; interacts with Nap1p; may interact with ribosomes, based on co-purification experiments; potential Cdc28p substrate
YNL035C	61.6648	0.0493591	0.397803	NA	61.6648	0.285028	0.52165	0.999906	61.6648	-0.235668	0.655991	0.999827		Putative protein of unknown function with similarity to proteins containing WD-40 domains; green fluorescent protein (GFP)-fusion protein localizes to the nucleus; YNL035C is not an essential gene
YBL039C	684.187	-0.299415	0.326087	0.959028	684.187	-0.204275	0.435104	0.999906	684.187	-0.09514	0.543735	0.999827	URA7	Major CTP synthase isozyme (see also URA8), catalyzes the ATP-dependent transfer of the amide nitrogen from glutamine to UTP, forming CTP, the final step in de novo biosynthesis of pyrimidines; involved in phospholipid biosynthesis
YGR173W	211.461	-0.30483	0.320344	0.959028	211.461	0.00993902	0.438092	0.999906	211.461	-0.314769	0.54272	0.999827	RBG2	Protein with a role in translation; forms a complex with Gir2p; has similarity to mammalian developmentally regulated GTP-binding protein
YDR457W	465.455	-0.200773	0.284015	0.967178	465.455	0.174361	0.379792	0.999906	465.455	-0.375134	0.474243	0.999827	TOM1	E3 ubiquitin ligase of the hect-domain class; has a role in mRNA export from the nucleus and may regulate transcriptional coactivators; involved in degradation of excess histones
YIL155C	148.47	0.0411849	0.395146	0.992604	148.47	0.44764	0.514504	0.999906	148.47	-0.406455	0.648728	0.999827	GUT2	Mitochondrial glycerol-3-phosphate dehydrogenase; expression is repressed by both glucose and cAMP and derepressed by non-fermentable carbon sources in a Snf1p, Rsf1p, Hap2/3/4/5 complex dependent manner
YKR090W	53.9049	-0.444843	0.439445	NA	53.9049	0.49704	0.540574	0.999906	53.9049	-0.941883	0.696657	0.999827	PXL1	LIM domain-containing protein that localizes to sites of polarized growth, required for selection and/or maintenance of polarized growth sites, may modulate signaling by the GTPases Cdc42p and Rho1p; has similarity to metazoan paxillin
YHL033C	1197.85	-0.118781	0.354836	0.992604	1197.85	0.0843189	0.472381	0.999906	1197.85	-0.2031	0.590807	0.999827	RPL8A	Ribosomal protein L4 of the large (60S) ribosomal subunit, nearly identical to Rpl8Bp and has similarity to rat L7a ribosomal protein; mutation results in decreased amounts of free 60S subunits
YBR078W	2468.54	0.331887	0.27795	0.959028	2468.54	-0.113511	0.376545	0.999906	2468.54	0.445398	0.46802	0.999827	ECM33	GPI-anchored protein of unknown function, has a possible role in apical bud growth; GPI-anchoring on the plasma membrane crucial to function; phosphorylated in mitochondria; similar to Sps2p and Pst1p
YLR248W	236.759	0.10776	0.302416	0.992604	236.759	0.063966	0.406752	0.999906	236.759	0.043794	0.506854	0.999827	RCK2	Protein kinase involved in the response to oxidative and osmotic stress; identified as suppressor of S. pombe cell cycle checkpoint mutations; similar to CaM (calmodulin) kinases
YBR246W	50.8834	0.0019581	0.444446	NA	50.8834	0.274908	0.539832	0.999906	50.8834	-0.27295	0.699228	0.999827	RRT2	Putative protein of unknown function; non-essential gene identified in a screen for mutants with increased levels of rDNA transcription; null mutants display a weak carboxypeptidase Y missorting/secretion phenotype
YLR187W	116.853	-0.212605	0.37529	0.982129	116.853	0.101888	0.479245	0.999906	116.853	-0.314493	0.6087	0.999827	SKG3	Protein of unknown function; green fluorescent protein (GFP)-fusion protein localizes to the cell periphery, cytoplasm, bud, and bud neck; potential Cdc28p substrate; similar to Caf120p and Skg4p
YLR086W	155.201	-0.0687361	0.355994	0.992604	155.201	0.0880097	0.455952	0.999906	155.201	-0.156746	0.578465	0.999827	SMC4	Subunit of the condensin complex; reorganizes chromosomes during cell division; forms a complex with Smc2p that has ATP-hydrolyzing and DNA-binding activity; required for tRNA gene clustering at the nucleolus; potential Cdc28p substrate
YKL201C	43.8278	-0.50751	0.505893	NA	43.8278	0.122906	0.599124	0.999906	43.8278	-0.630417	0.784142	0.999827	MNN4	Putative positive regulator of mannosylphosphate transferase (Mnn6p), involved in mannosylphosphorylation of N-linked oligosaccharides; expression increases in late-logarithmic and stationary growth phases
YFR004W	222.89	0.117209	0.292933	0.992604	222.89	0.321506	0.406383	0.999906	222.89	-0.204297	0.50095	0.999827	RPN11	Metalloprotease subunit of the 19S regulatory particle of the 26S proteasome lid; couples the deubiquitination and degradation of proteasome substrates; involved, independent of catalytic activity, in fission of mitochondria and peroxisomes
YPR042C	69.4854	0.196769	0.4027	0.992604	69.4854	-0.136682	0.495666	0.999906	69.4854	0.333451	0.638625	0.999827	PUF2	Member of the PUF protein family, which is defined by the presence of Pumilio homology domains that confer RNA binding activity; preferentially binds mRNAs encoding membrane-associated proteins
YHR183W	1293.84	0.0407509	0.278747	0.992604	1293.84	0.179602	0.381821	0.999906	1293.84	-0.138852	0.472744	0.999827	GND1	6-phosphogluconate dehydrogenase (decarboxylating), catalyzes an NADPH regenerating reaction in the pentose phosphate pathway; required for growth on D-glucono-delta-lactone and adaptation to oxidative stress
YML104C	38.3415	0.393026	0.499346	NA	38.3415	0.0922022	0.575149	0.999906	38.3415	0.300823	0.761622	0.999827	MDM1	Intermediate filament protein, required for nuclear and mitochondrial transmission to daughter buds; contains a Phox homology (PX) domain and specifically binds phosphatidylinositol 3-phosphate (PtdIns-3-P)
YJL165C	58.955	-0.298169	0.419029	NA	58.955	-0.459857	0.508926	0.999906	58.955	0.161688	0.659238	0.999827	HAL5	Putative protein kinase; overexpression increases sodium and lithium tolerance, whereas gene disruption increases cation and low pH sensitivity and impairs potassium uptake, suggesting a role in regulation of Trk1p and/or Trk2p transporters
YBR202W	110.585	-0.333165	0.409912	0.959028	110.585	0.231877	0.521002	0.999906	110.585	-0.565042	0.662924	0.999827	MCM7	Component of the hexameric MCM complex, which is important for priming origins of DNA replication in G1 and becomes an active ATP-dependent helicase that promotes DNA melting and elongation when activated by Cdc7p-Dbf4p in S-phase
YHR208W	333.301	0.505478	0.304632	0.959028	333.301	0.11951	0.409115	0.999906	333.301	0.385968	0.510072	0.999827	BAT1	Mitochondrial branched-chain amino acid aminotransferase, homolog of murine ECA39; highly expressed during logarithmic phase and repressed during stationary phase
YFR040W	133.378	0.107574	0.374119	0.992604	133.378	0.235078	0.481852	0.999906	133.378	-0.127504	0.610032	0.999827	SAP155	Protein that forms a complex with the Sit4p protein phosphatase and is required for its function; member of a family of similar proteins including Sap4p, Sap185p, and Sap190p
YER025W	978.124	-0.236169	0.285709	0.959028	978.124	-0.1273	0.389207	0.999906	978.124	-0.108869	0.482817	0.999827	GCD11	Gamma subunit of the translation initiation factor eIF2, involved in the identification of the start codon; binds GTP when forming the ternary complex with GTP and tRNAi-Met
YNL339C	40.1147	-0.351946	0.513839	NA	40.1147	1.21558	0.578547	0.999906	40.1147	-1.56753	0.773757	0.999827	YRF1-6	Helicase encoded by the Y' element of subtelomeric regions, highly expressed in the mutants lacking the telomerase component TLC1; potentially phosphorylated by Cdc28p
YPL268W	23.1694	0.0587225	0.585082	NA	23.1694	-0.756749	0.630032	0.999906	23.1694	0.815472	0.859843	0.999827	PLC1	Phospholipase C, hydrolyzes phosphatidylinositol 4,5-biphosphate (PIP2) to generate the signaling molecules inositol 1,4,5-triphosphate (IP3) and 1,2-diacylglycerol (DAG); involved in regulating many cellular processes
YNL125C	63.7686	-0.654296	0.396763	NA	63.7686	0.23954	0.499676	0.999906	63.7686	-0.893836	0.638049	0.999827	ESBP6	Protein with similarity to monocarboxylate permeases, appears not to be involved in transport of monocarboxylates such as lactate, pyruvate or acetate across the plasma membrane
YOL007C	51.6733	0.0713924	0.470765	NA	51.6733	0.544856	0.57049	0.999906	51.6733	-0.473464	0.739628	0.999827	CSI2	Protein of unknown function; green fluorescent protein (GFP)- fusion protein localizes to the mother side of the bud neck and the vacuole; YOL007C is not an essential gene
YBL028C	75.733	-0.325518	0.430483	0.962661	75.733	-0.126982	0.539378	0.999906	75.733	-0.198536	0.690104	0.999827		Protein of unknown function that may interact with ribosomes; green fluorescent protein (GFP)-fusion protein localizes to the nucleolus; predicted to be involved in ribosome biogenesis
YGR162W	957.035	-0.4904	0.279805	0.959028	957.035	0.0139468	0.378746	0.999906	957.035	-0.504346	0.470893	0.999827	TIF4631	Translation initiation factor eIF4G, subunit of the mRNA cap-binding protein complex (eIF4F) that also contains eIF4E (Cdc33p); interacts with Pab1p and with eIF4A (Tif1p); also has a role in biogenesis of the large ribosomal subunit
YMR033W	90.6378	-0.351291	0.362286	0.959028	90.6378	-0.366223	0.475179	0.999906	90.6378	0.0149316	0.597534	0.999827	ARP9	Component of both the SWI/SNF and RSC chromatin remodeling complexes; actin-related protein involved in transcriptional regulation
YJL020C	387.502	-0.103149	0.335116	0.992604	387.502	0.36235	0.447139	0.999906	387.502	-0.465499	0.558779	0.999827	BBC1	Protein possibly involved in assembly of actin patches; interacts with an actin assembly factor Las17p and with the SH3 domains of Type I myosins Myo3p and Myo5p; localized predominantly to cortical actin patches
YPL175W	28.6073	-0.04167	0.514813	NA	28.6073	-0.781852	0.597827	0.999906	28.6073	0.740182	0.788981	0.999827	SPT14	UDP-GlcNAc-binding and catalytic subunit of the enzyme that mediates the first step in glycosylphosphatidylinositol (GPI) biosynthesis, mutations cause defects in transcription and in biogenesis of cell wall proteins
YJL121C	307.854	0.0959067	0.276896	0.992604	307.854	0.085	0.404699	0.999906	307.854	0.0109066	0.490356	0.999827	RPE1	D-ribulose-5-phosphate 3-epimerase, catalyzes a reaction in the non-oxidative part of the pentose-phosphate pathway; mutants are sensitive to oxidative stress
YJL200C	161.697	-0.163677	0.350338	0.992604	161.697	-0.269642	0.460923	0.999906	161.697	0.105966	0.578954	0.999827	ACO2	Putative mitochondrial aconitase isozyme; similarity to Aco1p, an aconitase required for the TCA cycle; expression induced during growth on glucose, by amino acid starvation via Gcn4p, and repressed on ethanol
YDR262W	56.1129	0.362394	0.411376	NA	56.1129	-0.0498785	0.517468	0.999906	56.1129	0.412272	0.661044	0.999827		Putative protein of unknown function; green fluorescent protein (GFP)-fusion protein localizes to the vacuole and is induced in response to the DNA-damaging agent MMS; gene expression increases in response to Zymoliase treatment
YDR464W	122.385	-0.43526	0.368522	0.959028	122.385	-0.0444682	0.469789	0.999906	122.385	-0.390792	0.597085	0.999827	SPP41	Protein involved in negative regulation of expression of spliceosome components PRP4 and PRP3
YDR060W	310.244	-0.628804	0.321226	0.877416	310.244	-0.378863	0.426108	0.999906	310.244	-0.249941	0.533623	0.999827	MAK21	Constituent of 66S pre-ribosomal particles, required for large (60S) ribosomal subunit biogenesis; involved in nuclear export of pre-ribosomes; required for maintenance of dsRNA virus; homolog of human CAATT-binding protein
YGR140W	62.3735	-0.420106	0.447452	NA	62.3735	0.152363	0.548269	0.999906	62.3735	-0.572469	0.70768	0.999827	CBF2	Essential kinetochore protein, component of the CBF3 multisubunit complex that binds to the CDEIII region of the centromere; Cbf2p also binds to the CDEII region possibly forming a different multimeric complex, ubiquitinated in vivo
YOL124C	64.7196	-0.4072	0.425567	NA	64.7196	-0.380064	0.541845	0.999906	64.7196	-0.0271357	0.688988	0.999827	TRM11	Catalytic subunit of an adoMet-dependent tRNA methyltransferase complex (Trm11p-Trm112p), required for the methylation of the guanosine nucleotide at position 10 (m2G10) in tRNAs; contains a THUMP domain and a methyltransferase domain
YDR161W	114.451	-0.129244	0.382416	0.992604	114.451	-0.305732	0.502222	0.999906	114.451	0.176488	0.631244	0.999827		Putative protein of unknown function; non-essential gene; proposed function in rRNA and ribosome biosynthesis based on transcriptional co-regulation; genetic interactions suggest a role in ER-associated protein degradation (ERAD)
YKL021C	130.895	-0.210923	0.355128	0.979138	130.895	0.0317972	0.478185	0.999906	130.895	-0.24272	0.595629	0.999827	MAK11	Protein involved in an early, nucleolar step of 60S ribosomal subunit biogenesis; essential for cell growth and replication of killer M1 dsRNA virus; contains four beta-transducin repeats
YPL048W	831.929	0.100588	0.299643	0.992604	831.929	0.114422	0.408337	0.999906	831.929	-0.0138339	0.506483	0.999827	CAM1	Nuclear protein required for transcription of MXR1; binds the MXR1 promoter in the presence of other nuclear factors; binds calcium and phospholipids; has similarity to translational cofactor EF-1 gamma
YML126C	742.792	0.123582	0.281705	0.992604	742.792	-0.0594638	0.384572	0.999906	742.792	0.183045	0.476711	0.999827	ERG13	3-hydroxy-3-methylglutaryl-CoA (HMG-CoA) synthase, catalyzes the formation of HMG-CoA from acetyl-CoA and acetoacetyl-CoA; involved in the second step in mevalonate biosynthesis
YAR003W	39.9181	0.285095	0.467104	NA	39.9181	-0.404822	0.558445	0.999906	39.9181	0.689917	0.728053	0.999827	SWD1	Subunit of the COMPASS (Set1C) complex, which methylates histone H3 on lysine 4 and is required in transcriptional silencing near telomeres; WD40 beta propeller superfamily member with similarity to mammalian Rbbp7
YBL082C	86.4163	0.555613	0.389966	0.959028	86.4163	0.428674	0.497145	0.999906	86.4163	0.126939	0.631796	0.999827	ALG3	Dolichol-P-Man dependent alpha(1-3) mannosyltransferase, involved in the synthesis of dolichol-linked oligosaccharide donor for N-linked glycosylation of proteins
YKL065C	118.613	0.357923	0.371365	0.959028	118.613	-0.132052	0.488166	0.999906	118.613	0.489974	0.613362	0.999827	YET1	Endoplasmic reticulum transmembrane protein; may interact with ribosomes, based on co-purification experiments; homolog of human BAP31 protein
YDR226W	649.535	0.16804	0.263579	0.971825	649.535	-0.0409734	0.366749	0.999906	649.535	0.209013	0.45164	0.999827	ADK1	Adenylate kinase, required for purine metabolism; localized to the cytoplasm and the mitochondria; lacks cleavable signal sequence
YPL084W	124.559	-0.409481	0.343665	0.959028	124.559	0.189632	0.45444	0.999906	124.559	-0.599113	0.569754	0.999827	BRO1	Cytoplasmic class E vacuolar protein sorting (VPS) factor that coordinates deubiquitination in the multivesicular body (MVB) pathway by recruiting Doa4p to endosomes
YKL164C	191.124	-0.203602	0.419471	0.992604	191.124	0.128893	0.533917	0.999906	191.124	-0.332495	0.678986	0.999827	PIR1	O-glycosylated protein required for cell wall stability; attached to the cell wall via beta-1,3-glucan; mediates mitochondrial translocation of Apn1p; expression regulated by the cell integrity pathway and by Swi5p during the cell cycle
YMR186W	5795.71	-0.461067	0.370813	0.959028	5795.71	0.142611	0.481748	0.999906	5795.71	-0.603677	0.607934	0.999827	HSC82	Cytoplasmic chaperone of the Hsp90 family, redundant in function and nearly identical with Hsp82p, and together they are essential; expressed constitutively at 10-fold higher basal levels than HSP82 and induced 2-3 fold by heat shock
YDR420W	112.869	0.401984	0.440061	0.959028	112.869	-0.0865334	0.519517	0.999906	112.869	0.488517	0.680841	0.999827	HKR1	Mucin family member that functions as an osmosensor in the Sho1p-mediated HOG pathway with Msb2p; proposed to be a negative regulator of filamentous growth; mutant displays defects in beta-1,3 glucan synthesis and bud site selection
YCR089W	54.9808	0.571854	0.518031	NA	54.9808	0.318492	0.602109	0.999906	54.9808	0.253362	0.794267	0.999827	FIG2	Cell wall adhesin, expressed specifically during mating; may be involved in maintenance of cell wall integrity during mating
YDL048C	33.2213	0.307799	0.515629	NA	33.2213	-0.271827	0.594244	0.999906	33.2213	0.579626	0.786763	0.999827	STP4	Protein containing a Kruppel-type zinc-finger domain; has similarity to Stp1p, Stp2p, and Stp3p
YOR085W	118.482	0.636983	0.377917	0.959028	118.482	0.0933955	0.492612	0.999906	118.482	0.543588	0.620861	0.999827	OST3	Gamma subunit of the oligosaccharyltransferase complex of the ER lumen, which catalyzes asparagine-linked glycosylation of newly synthesized proteins; Ost3p is important for N-glycosylation of a subset of proteins
YIL067C	47.1361	-0.279004	0.449836	NA	47.1361	-0.107487	0.563181	0.999906	47.1361	-0.171517	0.720777	0.999827		Uncharacterized protein of unknown function
YLL040C	497.349	0.0691962	0.301761	0.992604	497.349	0.167732	0.401722	0.999906	497.349	-0.0985358	0.502433	0.999827	VPS13	Protein of unknown function; heterooligomeric or homooligomeric complex; peripherally associated with membranes; homologous to human COH1; involved in sporulation, vacuolar protein sorting and protein-Golgi retention
YJL002C	332.067	0.522196	0.295829	0.959028	332.067	0.168245	0.399375	0.999906	332.067	0.35395	0.497003	0.999827	OST1	Alpha subunit of the oligosaccharyltransferase complex of the ER lumen, which catalyzes asparagine-linked glycosylation of newly synthesized proteins
YNL240C	46.4508	-0.188465	0.453462	NA	46.4508	-0.477402	0.563749	0.999906	46.4508	0.288937	0.723497	0.999827	NAR1	Component of the cytosolic iron-sulfur (FeS) protein assembly machinery, required for maturation of cytosolic and nuclear FeS proteins and for normal resistance to oxidative stress; homologous to human Narf
YPR161C	56.7374	-0.715353	0.427681	NA	56.7374	-0.494398	0.527766	0.999906	56.7374	-0.220955	0.679293	0.999827	SGV1	Cyclin (Bur2p)-dependent protein kinase that functions in transcriptional regulation; phosphorylates the carboxy-terminal domain of Rpo21p and the C-terminal repeat domain of Spt5p; regulated by Cak1p
YLR310C	168.244	-0.130979	0.332769	0.992604	168.244	-0.133379	0.426273	0.999906	168.244	0.00240012	0.54078	0.999827	CDC25	Membrane bound guanine nucleotide exchange factor (GEF or GDP-release factor); indirectly regulates adenylate cyclase through activation of Ras1p and Ras2p by stimulating the exchange of GDP for GTP; required for progression through G1
YPL176C	85.2287	-0.586655	0.368509	0.959028	85.2287	-0.005614	0.480751	0.999906	85.2287	-0.581041	0.605742	0.999827	TRE1	Plasma membrane protein that binds to Bsd2p and regulates ubiquitylation and vacuolar degradation of the metal transporter Smf1p; function is redundant with that of Tre2p; has similarity to transferrin receptors
YDL099W	55.5008	-0.159431	0.45108	NA	55.5008	-0.0338425	0.556889	0.999906	55.5008	-0.125588	0.716652	0.999827	BUG1	Cis-golgi localized protein involved in ER to Golgi transport; forms a complex with the mammalian GRASP65 homolog, Grh1p; mutants are compromised for the fusion of ER-derived vesicles with Golgi membranes
YGL012W	336.53	0.451443	0.307775	0.959028	336.53	0.264797	0.420362	0.999906	336.53	0.186646	0.520984	0.999827	ERG4	C-24(28) sterol reductase, catalyzes the final step in ergosterol biosynthesis; mutants are viable, but lack ergosterol
YKL096W	702.484	-0.0304957	0.263695	0.992604	702.484	0.000833963	0.367537	0.999906	702.484	-0.0313297	0.452347	0.999827	CWP1	Cell wall mannoprotein that localizes specifically to birth scars of daughter cells, linked to a beta-1,3- and beta-1,6-glucan heteropolymer through a phosphodiester bond; required for propionic acid resistance
YMR311C	108.765	0.0279153	0.378285	0.992604	108.765	0.0138903	0.500204	0.999906	108.765	0.014025	0.627131	0.999827	GLC8	Regulatory subunit of protein phosphatase 1 (Glc7p), involved in glycogen metabolism and chromosome segregation; proposed to regulate Glc7p activity via conformational alteration; ortholog of the mammalian protein phosphatase inhibitor 2
YKR072C	126.87	-0.432653	0.354724	0.959028	126.87	-0.261371	0.459172	0.999906	126.87	-0.171282	0.580231	0.999827	SIS2	Negative regulatory subunit of protein phosphatase 1 Ppz1p and also a subunit of the phosphopantothenoylcysteine decarboxylase (PPCDC; Cab3p, Sis2p, Vhs3p) complex, which catalyzes the third step of coenzyme A biosynthesis
YIR034C	72.8067	0.582929	0.425362	0.959028	72.8067	0.258276	0.544509	0.999906	72.8067	0.324653	0.690922	0.999827	LYS1	Saccharopine dehydrogenase (NAD+, L-lysine-forming), catalyzes the conversion of saccharopine to L-lysine, which is the final step in the lysine biosynthesis pathway; also has mRNA binding activity
YDL132W	165.141	0.170806	0.329008	0.987757	165.141	-0.00388721	0.433647	0.999906	165.141	0.174693	0.544327	0.999827	CDC53	Cullin, structural protein of SCF complexes (which also contain Skp1p, Cdc34p, Hrt1p and an F-box protein) involved in ubiquitination; SCF promotes the G1-S transition by targeting G1 cyclins and the Cln-CDK inhibitor Sic1p for degradation
YDR390C	72.6577	-0.0904802	0.401176	0.992604	72.6577	0.397743	0.514175	0.999906	72.6577	-0.488223	0.652151	0.999827	UBA2	Subunit of a heterodimeric nuclear SUMO activating enzyme (E1) with Aos1p; activates Smt3p (SUMO) before its conjugation to proteins (sumoylation), which may play a role in protein targeting; essential for viability
YOR076C	36.4202	-0.0210128	0.483978	NA	36.4202	-0.988759	0.575281	0.999906	36.4202	0.967747	0.751845	0.999827	SKI7	Coupling protein that mediates interactions between the Ski complex and the cytoplasmic exosome during 3'-5' RNA degradation; eRF3-like domain targets nonstop mRNA for degradation; null mutants have superkiller phenotype
YLR277C	79.7797	-0.0455778	0.405532	0.992604	79.7797	0.200852	0.50716	0.999906	79.7797	-0.24643	0.649351	0.999827	YSH1	Putative endoribonuclease, subunit of the mRNA cleavage and polyadenylation specificity complex; required for 3' processing, splicing, and transcriptional termination of mRNAs and snoRNAs
YOL092W	119.768	-0.0332778	0.348046	0.992604	119.768	0.143033	0.474943	0.999906	119.768	-0.176311	0.588812	0.999827		Putative protein of unknown function; predicted to contain six transmembrane domains and is 58% similar to the uncharacterized ORF YBR147W
YLR398C	321.532	-0.193505	0.292471	0.967178	321.532	-0.117717	0.393313	0.999906	321.532	-0.075789	0.490137	0.999827	SKI2	Ski complex component and putative RNA helicase, mediates 3'-5' RNA degradation by the cytoplasmic exosome; null mutants have superkiller phenotype of increased viral dsRNAs and are synthetic lethal with mutations in 5'-3' mRNA decay
YGL210W	49.8558	0.204005	0.43018	NA	49.8558	0.314694	0.528163	0.999906	49.8558	-0.110688	0.681131	0.999827	YPT32	Rab family GTPase, very similar to Ypt31p; involved in the exocytic pathway; mediates intra-Golgi traffic or the budding of post-Golgi vesicles from the trans-Golgi
YJR073C	88.3933	0.582908	0.360378	0.959028	88.3933	0.21294	0.491741	0.999906	88.3933	0.369968	0.609615	0.999827	OPI3	Phospholipid methyltransferase (methylene-fatty-acyl-phospholipid synthase), catalyzes the last two steps in phosphatidylcholine biosynthesis
YKR036C	48.9641	-0.457506	0.452179	NA	48.9641	0.345736	0.543299	0.999906	48.9641	-0.803242	0.706851	0.999827	CAF4	WD40 repeat-containing protein associated with the CCR4-NOT complex, interacts in a Ccr4p-dependent manner with Ssn2p; also interacts with Fis1p, Mdv1p and Dnm1p and plays a role in mitochondrial fission
YDR500C	488.169	0.355706	0.297642	0.959028	488.169	0.0711475	0.402403	0.999906	488.169	0.284559	0.500518	0.999827	RPL37B	Protein component of the large (60S) ribosomal subunit, has similarity to Rpl37Ap and to rat L37 ribosomal protein
YMR074C	110.356	0.621139	0.353005	0.959028	110.356	0.451695	0.470195	0.999906	110.356	0.169444	0.587925	0.999827		Protein with homology to human PDCD5, which is involved in programmed cell death; N-terminal region forms a conserved triple-helix bundle structure; overexpression promotes H2O2-induced apoptosis; YMR074C is not an essential gene
YGR119C	90.4647	-0.172809	0.382462	0.992604	90.4647	-0.137979	0.480784	0.999906	90.4647	-0.03483	0.614352	0.999827	NUP57	Nucleoporin, essential subunit of the nuclear pore complex (NPC), functions as the organizing center of an NPC subcomplex containing Nsp1p, Nup49p, Nup57p, and Nic96p
YLR354C	980.798	0.211905	0.271499	0.959028	980.798	0.40012	0.373139	0.999906	980.798	-0.188214	0.461458	0.999827	TAL1	Transaldolase, enzyme in the non-oxidative pentose phosphate pathway; converts sedoheptulose 7-phosphate and glyceraldehyde 3-phosphate to erythrose 4-phosphate and fructose 6-phosphate
YNL162W	2222.59	0.39623	0.2918	0.959028	2222.59	-0.0688656	0.392137	0.999906	2222.59	0.465096	0.488793	0.999827	RPL42A	Protein component of the large (60S) ribosomal subunit, identical to Rpl42Bp and has similarity to rat L44 ribosomal protein
YDR039C	474.835	-0.016453	0.274689	0.992952	474.835	-0.0720516	0.370771	0.999906	474.835	0.0555986	0.461438	0.999827	ENA2	P-type ATPase sodium pump, involved in Na+ efflux to allow salt tolerance; likely not involved in Li+ efflux
YLR130C	41.597	-0.307095	0.503075	NA	41.597	-0.650455	0.580331	0.999906	41.597	0.34336	0.768034	0.999827	ZRT2	Low-affinity zinc transporter of the plasma membrane; transcription is induced under low-zinc conditions by the Zap1p transcription factor
YMR131C	210.847	-0.166188	0.344463	0.992604	210.847	0.0959746	0.453813	0.999906	210.847	-0.262162	0.569736	0.999827	RRB1	Essential nuclear protein involved in early steps of ribosome biogenesis; physically interacts with the ribosomal protein Rpl3p
YNL192W	91.7837	-0.324144	0.367327	0.959028	91.7837	-0.252505	0.456308	0.999906	91.7837	-0.0716393	0.585787	0.999827	CHS1	Chitin synthase I, requires activation from zymogenic form in order to catalyze the transfer of N-acetylglucosamine (GlcNAc) to chitin; required for repairing the chitin septum during cytokinesis; transcription activated by mating factor
YGL113W	23.9729	0.548423	0.548132	NA	23.9729	0.387272	0.607298	0.999906	23.9729	0.161151	0.817953	0.999827	SLD3	Protein involved in the initiation of DNA replication, required for proper assembly of replication proteins at the origins of replication; interacts with Cdc45p
YIL159W	27.4334	0.322893	0.521883	NA	27.4334	0.374501	0.594876	0.999906	27.4334	-0.0516074	0.791283	0.999827	BNR1	Formin, nucleates the formation of linear actin filaments, involved in cell processes such as budding and mitotic spindle orientation which require the formation of polarized actin cables, functionally redundant with BNI1
YNR055C	78.6043	-0.53329	0.424862	0.959028	78.6043	-0.547372	0.514758	0.999906	78.6043	0.014082	0.667444	0.999827	HOL1	Putative transporter in the major facilitator superfamily (DHA1 family) of multidrug resistance transporters; mutations in membrane-spanning domains permit cation and histidinol uptake
YHR053C	57.5462	0.970704	0.435914	NA	57.5462	-0.312676	0.545147	0.999906	57.5462	1.28338	0.698005	0.999827	CUP1-1	Metallothionein, binds copper and mediates resistance to high concentrations of copper and cadmium; locus is variably amplified in different strains, with two copies, CUP1-1 and CUP1-2, in the genomic sequence reference strain S288C
YKR014C	188.2	-0.223444	0.336349	0.967178	188.2	-0.137934	0.465438	0.999906	188.2	-0.0855102	0.574249	0.999827	YPT52	Rab family GTPase, similar to Ypt51p and Ypt53p and to mammalian rab5; required for vacuolar protein sorting and endocytosis
YOL127W	1163.52	0.248224	0.286422	0.959028	1163.52	0.145247	0.386869	0.999906	1163.52	0.102977	0.481357	0.999827	RPL25	Primary rRNA-binding ribosomal protein component of the large (60S) ribosomal subunit, has similarity to E. coli L23 and rat L23a ribosomal proteins; binds to 26S rRNA via a conserved C-terminal motif
YPL110C	70.803	0.503674	0.392527	0.959028	70.803	-0.0995844	0.501934	0.999906	70.803	0.603258	0.637182	0.999827	GDE1	Glycerophosphocholine (GroPCho) phosphodiesterase; hydrolyzes GroPCho to choline and glycerolphosphate, for use as a phosphate source and as a precursor for phosphocholine synthesis; may interact with ribosomes
YOR256C	61.9833	-0.0548214	0.411818	NA	61.9833	-0.0405635	0.514846	0.999906	61.9833	-0.0142579	0.659279	0.999827	TRE2	Protein that functions with Tre1p to regulate ubiquitylation and vacuolar degradation of the metal transporter Smf1p; has similarity to transferrin receptors; inviability of null mutant in systematic studies is due to proximity to CDC31
YOR098C	176.204	-0.289086	0.316709	0.959028	176.204	-0.0090738	0.416441	0.999906	176.204	-0.280012	0.52319	0.999827	NUP1	Nuclear pore complex (NPC) subunit, involved in protein import/export and in export of RNAs, possible karyopherin release factor that accelerates release of karyopherin-cargo complexes after transport across NPC; potential Cdc28p substrate
YML024W	1776.63	-0.234367	0.315115	0.967178	1776.63	0.0775055	0.42044	0.999906	1776.63	-0.311872	0.525421	0.999827	RPS17A	Ribosomal protein 51 (rp51) of the small (40s) subunit; nearly identical to Rps17Bp and has similarity to rat S17 ribosomal protein
YBR059C	195.778	0.438872	0.339707	0.959028	195.778	0.214122	0.445057	0.999906	195.778	0.22475	0.55988	0.999827	AKL1	Ser-Thr protein kinase, member (with Ark1p and Prk1p) of the Ark kinase family; involved in endocytosis and actin cytoskeleton organization
YOR375C	474.838	0.468557	0.335537	0.959028	474.838	0.0991708	0.454321	0.999906	474.838	0.369386	0.564792	0.999827	GDH1	NADP(+)-dependent glutamate dehydrogenase, synthesizes glutamate from ammonia and alpha-ketoglutarate; rate of alpha-ketoglutarate utilization differs from Gdh3p; expression regulated by nitrogen and carbon sources
YKL078W	48.1708	-0.405685	0.472102	NA	48.1708	-0.254208	0.578523	0.999906	48.1708	-0.151477	0.746706	0.999827	DHR2	Predominantly nucleolar DEAH-box ATP-dependent RNA helicase, required for 18S rRNA synthesis
YNL039W	46.8532	0.0135289	0.450424	NA	46.8532	0.12734	0.53822	0.999906	46.8532	-0.113811	0.701806	0.999827	BDP1	Essential subunit of RNA polymerase III transcription factor (TFIIIB), which is involved in transcription of genes encoding tRNAs, 5S rRNA, U6 snRNA, and other small RNAs
YPL154C	995.657	0.169617	0.29718	0.982129	995.657	0.313807	0.403148	0.999906	995.657	-0.14419	0.500843	0.999827	PEP4	Vacuolar aspartyl protease (proteinase A), required for the posttranslational precursor maturation of vacuolar proteinases; important for protein turnover after oxidative damage; synthesized as a zymogen, self-activates
YNR011C	43.8859	0.542754	0.470073	NA	43.8859	-0.00766544	0.56523	0.999906	43.8859	0.550419	0.735123	0.999827	PRP2	RNA-dependent ATPase in the DEAH-box family, required for activation of the spliceosome before the first transesterification step in RNA splicing; orthologous to human protein DHX16
YGL157W	241.592	0.80392	0.327087	0.709004	241.592	0.24907	0.443755	0.999906	241.592	0.55485	0.551267	0.999827	ARI1	NADPH-dependent aldehyde reductase, utilizes aromatic and alophatic aldehyde substrates; member of the short-chain dehydrogenase/reductase superfamily
YOL038W	303.955	-0.337222	0.314263	0.959028	303.955	-0.21903	0.434071	0.999906	303.955	-0.118192	0.53589	0.999827	PRE6	Alpha 4 subunit of the 20S proteasome; may replace alpha 3 subunit (Pre9p) under stress conditions to create a more active proteasomal isoform; GFP-fusion protein relocates from cytosol to the mitochondrial surface upon oxidative stress
YCL034W	126.249	-0.0891697	0.340454	0.992604	126.249	0.340011	0.467376	0.999906	126.249	-0.429181	0.57822	0.999827	LSB5	Protein of unknown function; binds Las17p, which is a homolog of human Wiskott-Aldrich Syndrome protein involved in actin patch assembly and actin polymerization; may mediate disassembly of the Pan1 complex from the endocytic coat
YEL032W	144.895	-0.299831	0.360464	0.959028	144.895	0.251283	0.475974	0.999906	144.895	-0.551114	0.597062	0.999827	MCM3	Protein involved in DNA replication; component of the Mcm2-7 hexameric complex that binds chromatin as a part of the pre-replicative complex
YML119W	33.3957	-0.425946	0.544502	NA	33.3957	-0.624603	0.622863	0.999906	33.3957	0.198657	0.827312	0.999827		Putative protein of unknown function; YML119W is not an essential gene; potential Cdc28p substrate
YJL001W	165.685	0.144014	0.33203	0.992604	165.685	0.518114	0.455778	0.999906	165.685	-0.3741	0.563883	0.999827	PRE3	Beta 1 subunit of the 20S proteasome, responsible for cleavage after acidic residues in peptides
YBR095C	43.8097	0.0651035	0.445892	NA	43.8097	-0.372753	0.551415	0.999906	43.8097	0.437857	0.709144	0.999827	RXT2	Subunit of the histone deacetylase Rpd3L complex; possibly involved in cell fusion and invasive growth
YDR497C	356.674	-0.295941	0.278647	0.959028	356.674	-0.128912	0.377026	0.999906	356.674	-0.167029	0.468821	0.999827	ITR1	Myo-inositol transporter with strong similarity to the minor myo-inositol transporter Itr2p, member of the sugar transporter superfamily; expression is repressed by inositol and choline via Opi1p and derepressed via Ino2p and Ino4p
Q0160	90.5908	-0.43845	0.641994	0.967178	90.5908	0.311902	0.633462	0.999906	90.5908	-0.750352	0.901904	0.999827	SCEI	I-SceI DNA endonuclease, encoded by the mitochondrial group I intron of the 21S_rRNA gene; mediates gene conversion that propagates the intron into intron-less copies of the 21S_rRNA gene
YDR309C	57.3063	0.265021	0.430087	NA	57.3063	0.140008	0.532188	0.999906	57.3063	0.125013	0.68423	0.999827	GIC2	Redundant rho-like GTPase Cdc42p effector; homolog of Gic1p; involved in initiation of budding and cellular polarization; interacts with Cdc42p via the Cdc42/Rac-interactive binding (CRIB) domain and with PI(4,5)P2 via a polybasic region
YPR183W	404.415	0.566004	0.275204	0.833522	404.415	0.318594	0.383111	0.999906	404.415	0.24741	0.471708	0.999827	DPM1	Dolichol phosphate mannose (Dol-P-Man) synthase of the ER membrane, catalyzes the formation of Dol-P-Man from Dol-P and GDP-Man; required for glycosyl phosphatidylinositol membrane anchoring, O mannosylation, and protein glycosylation
YPL167C	25.4909	-0.839697	0.611174	NA	25.4909	-0.146758	0.642908	0.999906	25.4909	-0.692939	0.887059	0.999827	REV3	Catalytic subunit of DNA polymerase zeta, involved in translesion synthesis during post-replication repair; required for mutagenesis induced by DNA damage; involved in double-strand break repair
YMR120C	183.828	-0.191793	0.408352	0.992604	183.828	-0.539587	0.530028	0.999906	183.828	0.347795	0.669091	0.999827	ADE17	Enzyme of 'de novo' purine biosynthesis containing both 5-aminoimidazole-4-carboxamide ribonucleotide transformylase and inosine monophosphate cyclohydrolase activities, isozyme of Ade16p; ade16 ade17 mutants require adenine and histidine
YAL041W	57.5856	0.182054	0.411987	NA	57.5856	0.249307	0.524044	0.999906	57.5856	-0.067253	0.666565	0.999827	CDC24	Guanine nucleotide exchange factor (GEF or GDP-release factor) for Cdc42p; required for polarity establishment and maintenance, and mutants have morphological defects in bud formation and shmooing
YBL024W	330.561	-0.385018	0.288069	0.959028	330.561	-0.453505	0.394131	0.999906	330.561	0.0684873	0.488183	0.999827	NCL1	S-adenosyl-L-methionine-dependent tRNA: m5C-methyltransferase, methylates cytosine to m5C at several positions in tRNAs and intron-containing pre-tRNAs; similar to Nop2p and human proliferation associated nucleolar protein p120
YGL245W	1427.55	-0.0467667	0.253221	0.992604	1427.55	0.0814298	0.349915	0.999906	1427.55	-0.128197	0.431928	0.999827	GUS1	Glutamyl-tRNA synthetase (GluRS), forms a complex with methionyl-tRNA synthetase (Mes1p) and Arc1p; complex formation increases the catalytic efficiency of both tRNA synthetases and ensures their correct localization to the cytoplasm
YDL022W	1496.25	0.321414	0.266837	0.959028	1496.25	0.624562	0.369028	0.999906	1496.25	-0.303147	0.455394	0.999827	GPD1	NAD-dependent glycerol-3-phosphate dehydrogenase, key enzyme of glycerol synthesis, essential for growth under osmotic stress; expression regulated by high-osmolarity glycerol response pathway; homolog of Gpd2p
YLR389C	246.67	0.354269	0.28664	0.959028	246.67	0.26997	0.386076	0.999906	246.67	0.0842987	0.480846	0.999827	STE23	Metalloprotease involved, with homolog Axl1p, in N-terminal processing of pro-a-factor to the mature form; expressed in both haploids and diploids; member of the insulin-degrading enzyme family
YLR442C	75.9329	-0.344328	0.412904	0.959028	75.9329	0.0712526	0.512746	0.999906	75.9329	-0.415581	0.658329	0.999827	SIR3	Silencing protein that interacts with Sir2p and Sir4p, and histone H3 and H4 tails, to establish a transcriptionally silent chromatin state; required for spreading of silenced chromatin; recruited to chromatin through interaction with Rap1p
YOR067C	89.3689	0.105208	0.357058	0.992604	89.3689	-0.25851	0.481746	0.999906	89.3689	0.363717	0.59964	0.999827	ALG8	Glucosyl transferase, involved in N-linked glycosylation; adds glucose to the dolichol-linked oligosaccharide precursor prior to transfer to protein during lipid-linked oligosaccharide biosynthesis; similar to Alg6p
YCR031C	1459.76	0.150397	0.249492	0.979138	1459.76	-0.0121421	0.34252	0.999906	1459.76	0.162539	0.423753	0.999827	RPS14A	Ribosomal protein 59 of the small subunit, required for ribosome assembly and 20S pre-rRNA processing; mutations confer cryptopleurine resistance; nearly identical to Rps14Bp and similar to E. coli S11 and rat S14 ribosomal proteins
YML081W	102.535	-0.254304	0.366852	0.967178	102.535	-0.0520746	0.457892	0.999906	102.535	-0.202229	0.586723	0.999827		Putative protein of unknown function; green fluorescent protein (GFP)-fusion protein localizes to the nucleus; YML081w is not an essential gene
YHR107C	251.239	0.0181689	0.30252	0.992952	251.239	0.392382	0.419426	0.999906	251.239	-0.374213	0.517139	0.999827	CDC12	Component of the septin ring of the mother-bud neck that is required for cytokinesis; septins recruit proteins to the neck and can act as a barrier to diffusion at the membrane, and they comprise the 10nm filaments seen with EM
YDL066W	833.006	0.411824	0.292171	0.959028	833.006	0.26244	0.397681	0.999906	833.006	0.149383	0.49347	0.999827	IDP1	Mitochondrial NADP-specific isocitrate dehydrogenase, catalyzes the oxidation of isocitrate to alpha-ketoglutarate; not required for mitochondrial respiration and may function to divert alpha-ketoglutarate to biosynthetic processes
YBL060W	30.1536	0.90557	0.516173	NA	30.1536	-0.482546	0.589224	0.999906	30.1536	1.38812	0.783388	0.999827	YEL1	Guanine nucleotide exchange factor specific for Arf3p; localized to the bud neck and tip; required for localization of Arf3p to the bud neck and tip
YLR103C	69.1166	0.00913208	0.463984	0.996693	69.1166	0.112151	0.5604	0.999906	69.1166	-0.103019	0.727545	0.999827	CDC45	DNA replication initiation factor; recruited to MCM pre-RC complexes at replication origins; promotes release of MCM from Mcm10p, recruits elongation machinery; mutants in human homolog may cause velocardiofacial and DiGeorge syndromes
YGR229C	277.199	-0.088892	0.290118	0.992604	277.199	0.172959	0.391701	0.999906	277.199	-0.261851	0.487439	0.999827	SMI1	Protein involved in the regulation of cell wall synthesis; proposed to be involved in coordinating cell cycle progression with cell wall integrity
YML017W	120.323	-0.105417	0.364229	0.992604	120.323	0.433238	0.475639	0.999906	120.323	-0.538654	0.59907	0.999827	PSP2	Asn rich cytoplasmic protein that contains RGG motifs; high-copy suppressor of group II intron-splicing defects of a mutation in MRS2 and of a conditional mutation in POL1 (DNA polymerase alpha); possible role in mitochondrial mRNA splicing
YOR320C	62.7995	0.116018	0.410386	NA	62.7995	0.0270742	0.52232	0.999906	62.7995	0.0889442	0.664241	0.999827	GNT1	N-acetylglucosaminyltransferase capable of modification of N-linked glycans in the Golgi apparatus
YLR002C	106.217	-0.137514	0.412486	0.992604	106.217	-0.0351282	0.522834	0.999906	106.217	-0.102385	0.665957	0.999827	NOC3	Protein that forms a nuclear complex with Noc2p that binds to 66S ribosomal precursors to mediate their intranuclear transport; also binds to chromatin to promote the association of DNA replication factors and replication initiation
YOR023C	45.8857	0.331679	0.467513	NA	45.8857	-0.318027	0.556816	0.999906	45.8857	0.649706	0.72706	0.999827	AHC1	Subunit of the Ada histone acetyltransferase complex, required for structural integrity of the complex
YLR244C	516.927	0.0374451	0.350858	0.992604	516.927	-0.0337195	0.460134	0.999906	516.927	0.0711645	0.57864	0.999827	MAP1	Methionine aminopeptidase, catalyzes the cotranslational removal of N-terminal methionine from nascent polypeptides; function is partially redundant with that of Map2p
YJL177W	626.094	-0.268459	0.289138	0.959028	626.094	-0.224742	0.392785	0.999906	626.094	-0.0437167	0.48773	0.999827	RPL17B	Protein component of the large (60S) ribosomal subunit, nearly identical to Rpl17Ap and has similarity to E. coli L22 and rat L17 ribosomal proteins
YLR020C	77.1533	-0.195044	0.463896	0.992604	77.1533	0.0765457	0.564651	0.999906	77.1533	-0.27159	0.730771	0.999827	YEH2	Steryl ester hydrolase, catalyzes steryl ester hydrolysis at the plasma membrane; involved in sterol metabolism
YPL246C	62.8418	0.336572	0.456068	NA	62.8418	0.119055	0.561533	0.999906	62.8418	0.217517	0.723383	0.999827	RBD2	Possible rhomboid protease, has similarity to eukaryotic rhomboid proteases including Pcp1p
YLR222C	181.96	-0.18039	0.385954	0.992604	181.96	-0.119676	0.494914	0.999906	181.96	-0.0607136	0.627615	0.999827	UTP13	Nucleolar protein, component of the small subunit (SSU) processome containing the U3 snoRNA that is involved in processing of pre-18S rRNA
YHL048W	78.2132	-0.0847818	0.382911	0.992604	78.2132	0.454853	0.499568	0.999906	78.2132	-0.539635	0.62941	0.999827	COS8	Nuclear membrane protein, member of the DUP380 subfamily of conserved, often subtelomerically-encoded proteins; regulation suggests a potential role in the unfolded protein response
YNL082W	41.6586	0.370276	0.464563	NA	41.6586	0.37497	0.560295	0.999906	41.6586	-0.00469412	0.727782	0.999827	PMS1	ATP-binding protein required for mismatch repair in mitosis and meiosis; functions as a heterodimer with Mlh1p, binds double- and single-stranded DNA via its N-terminal domain, similar to E. coli MutL
YLR121C	60.6814	0.424488	0.56046	NA	60.6814	0.184438	0.632767	0.999906	60.6814	0.24005	0.845281	0.999827	YPS3	Aspartic protease, member of the yapsin family of proteases involved in cell wall growth and maintenance; attached to the plasma membrane via a glycosylphosphatidylinositol (GPI) anchor
YDR028C	163.251	-0.071761	0.35144	0.992604	163.251	-0.119432	0.45101	0.999906	163.251	0.0476705	0.571768	0.999827	REG1	Regulatory subunit of type 1 protein phosphatase Glc7p, involved in negative regulation of glucose-repressible genes
YMR102C	92.7708	-0.993749	0.388525	0.661057	92.7708	-0.0425736	0.474898	0.999906	92.7708	-0.951175	0.613589	0.999827		Protein of unknown function; transcription is activated by paralogous transcription factors Yrm1p and Yrr1p along with genes involved in multidrug resistance; mutant shows increased resistance to azoles; YMR102C is not an essential gene
YGR009C	81.8322	-0.456626	0.411255	0.959028	81.8322	-0.0416204	0.521176	0.999906	81.8322	-0.415005	0.663894	0.999827	SEC9	t-SNARE protein important for fusion of secretory vesicles with the plasma membrane; similar to but not functionally redundant with Spo20p; SNAP-25 homolog
YHR024C	79.8357	0.288398	0.384363	0.962661	79.8357	0.463446	0.504178	0.999906	79.8357	-0.175048	0.633944	0.999827	MAS2	Larger subunit of the mitochondrial processing protease (MPP), essential processing enzyme that cleaves the N-terminal targeting sequences from mitochondrially imported proteins
YGR180C	1137.96	0.254499	0.297925	0.959028	1137.96	0.0324257	0.402793	0.999906	1137.96	0.222073	0.501	0.999827	RNR4	Ribonucleotide-diphosphate reductase (RNR), small subunit; the RNR complex catalyzes the rate-limiting step in dNTP synthesis and is regulated by DNA replication and DNA damage checkpoint pathways via localization of the small subunits
YER083C	65.309	0.748766	0.417878	NA	65.309	0.320726	0.522637	0.999906	65.309	0.428041	0.669096	0.999827	GET2	Subunit of the GET complex; involved in insertion of proteins into the ER membrane; required for the retrieval of HDEL proteins from the Golgi to the ER in an ERD2 dependent fashion and for meiotic nuclear division
YGR081C	37.9371	-0.493057	0.539609	NA	37.9371	-0.0304905	0.619845	0.999906	37.9371	-0.462567	0.821819	0.999827	SLX9	Protein required for pre-rRNA processing; associated with the 90S pre-ribosome and 43S small ribosomal subunit precursor; interacts with U3 snoRNA; deletion mutant has synthetic fitness defect with an sgs1 deletion mutant
YDL189W	50.1477	-0.364857	0.443185	NA	50.1477	0.00116522	0.529963	0.999906	50.1477	-0.366022	0.690847	0.999827	RBS1	Protein of unknown function, identified as a high copy suppressor of psk1 psk2 mutations that confer temperature-sensitivity for galactose utilization; proposed to bind single-stranded nucleic acids via its R3H domain
YMR300C	159.358	-0.487126	0.344776	0.959028	159.358	-0.0119683	0.457462	0.999906	159.358	-0.475158	0.572837	0.999827	ADE4	Phosphoribosylpyrophosphate amidotransferase (PRPPAT; amidophosphoribosyltransferase), catalyzes first step of the 'de novo' purine nucleotide biosynthetic pathway
YGL021W	119.081	-1.1062	0.37077	0.345269	119.081	-0.85571	0.479446	0.999906	119.081	-0.25049	0.606065	0.999827	ALK1	Protein kinase; accumulation and phosphorylation are periodic during the cell cycle; phosphorylated in response to DNA damage; contains characteristic motifs for degradation via the APC pathway; similar to Alk2p and to mammalian haspins
YPL145C	389.346	-0.239711	0.347311	0.967178	389.346	0.135109	0.462637	0.999906	389.346	-0.374821	0.578496	0.999827	KES1	Member of the oxysterol binding protein family, which includes seven yeast homologs; involved in negative regulation of Sec14p-dependent Golgi complex secretory functions, peripheral membrane protein that localizes to the Golgi complex
YHR161C	60.4876	0.537269	0.419783	NA	60.4876	-0.141336	0.518188	0.999906	60.4876	0.678604	0.666872	0.999827	YAP1801	Protein involved in clathrin cage assembly; binds Pan1p and clathrin; homologous to Yap1802p, member of the AP180 protein family
YJR127C	126.335	-0.301183	0.360056	0.959028	126.335	-0.295475	0.443706	0.999906	126.335	-0.00570794	0.571415	0.999827	RSF2	Zinc-finger protein involved in transcriptional control of both nuclear and mitochondrial genes, many of which specify products required for glycerol-based growth, respiration, and other functions
YLL008W	543.676	-0.366421	0.372328	0.959028	543.676	-0.12654	0.483642	0.999906	543.676	-0.239881	0.610359	0.999827	DRS1	Nucleolar DEAD-box protein required for ribosome assembly and function, including synthesis of 60S ribosomal subunits; constituent of 66S pre-ribosomal particles
YOR144C	32.592	0.437509	0.494396	NA	32.592	0.388288	0.581769	0.999906	32.592	0.0492216	0.763386	0.999827	ELG1	Protein required for S phase progression and telomere homeostasis, forms an alternative replication factor C complex important for DNA replication and genome integrity; involved in homologous recombination-mediated DNA repair
YMR146C	543.118	-0.493158	0.297416	0.959028	543.118	0.242362	0.402849	0.999906	543.118	-0.73552	0.500743	0.999827	TIF34	eIF3i subunit of the core complex of translation initiation factor 3 (eIF3), which is essential for translation; stimulates rate of ribosomal scanning during translation reinitiation
YNL208W	442.107	0.519696	0.291173	0.959028	442.107	0.300543	0.397861	0.999906	442.107	0.219153	0.493024	0.999827		Protein of unknown function; may interact with ribosomes, based on co-purification experiments; authentic, non-tagged protein is detected in purified mitochondria in high-throughput studies; potential orthologs found in other fungi
YLR266C	41.8205	0.250141	0.50648	NA	41.8205	0.411069	0.583098	0.999906	41.8205	-0.160928	0.772302	0.999827	PDR8	Transcription factor; targets include ATP-binding cassette (ABC) transporters, major facilitator superfamily transporters, and other genes involved in the pleiotropic drug resistance (PDR) phenomenon
YPR129W	105.976	-0.357075	0.351554	0.959028	105.976	0.205644	0.47748	0.999906	105.976	-0.562719	0.592937	0.999827	SCD6	Protein containing an Lsm domain; negatively regulates translation initiation via 48S preinitiation complex assembly; may bind RNA and have a role in RNA processing; overproduction suppresses null mutation in clathrin heavy chain gene CHC1
YMR047C	140.134	-0.158715	0.340005	0.992604	140.134	0.264493	0.441897	0.999906	140.134	-0.423208	0.557559	0.999827	NUP116	Subunit of the Nup82 subcomplex of the nuclear pore complex; localized to both sides of the pore; contains a repetitive GLFG motif that interacts with mRNA export factor Mex67p and with karyopherin Kap95p; homologous to Nup100p
YNL097C	42.3683	-0.369602	0.470817	NA	42.3683	-1.03541	0.568567	0.999906	42.3683	0.66581	0.738208	0.999827	PHO23	Probable component of the Rpd3 histone deacetylase complex, involved in transcriptional regulation of PHO5; C-terminus has similarity to human candidate tumor suppressor p33(ING1) and its isoform ING3
YGR195W	49.7143	-0.717159	0.422407	NA	49.7143	0.515886	0.536282	0.999906	49.7143	-1.23305	0.682686	0.999827	SKI6	Exosome non-catalytic core component; involved in 3'-5' RNA processing and degradation in both the nucleus and the cytoplasm; has similarity to E. coli RNase PH and to human hRrp41p (EXOSC4)
YBR118W	34485.8	-0.146549	0.259046	0.982129	34485.8	0.124507	0.351762	0.999906	34485.8	-0.271055	0.436854	0.999827	TEF2	Translational elongation factor EF-1 alpha; also encoded by TEF1; functions in the binding reaction of aminoacyl-tRNA (AA-tRNA) to ribosomes; may also have a role in tRNA re-export from the nucleus
YJR110W	36.163	-0.356561	0.486826	NA	36.163	-0.183381	0.574177	0.999906	36.163	-0.17318	0.752779	0.999827	YMR1	Phosphatidylinositol 3-phosphate (PI3P) phosphatase; involved in various protein sorting pathways, including CVT targeting and endosome to vacuole transport; has similarity to the conserved myotubularin dual specificity phosphatase family
YFL017C	46.701	0.161746	0.437485	NA	46.701	-0.186434	0.543904	0.999906	46.701	0.34818	0.698006	0.999827	GNA1	Evolutionarily conserved glucosamine-6-phosphate acetyltransferase required for multiple cell cycle events including passage through START, DNA synthesis, and mitosis; involved in UDP-N-acetylglucosamine synthesis, forms GlcNAc6P from AcCoA
YJL093C	49.3648	-0.0254925	0.457321	NA	49.3648	0.189878	0.531266	0.999906	49.3648	-0.215371	0.700965	0.999827	TOK1	Outward-rectifier potassium channel of the plasma membrane with two pore domains in tandem, each of which forms a functional channel permeable to potassium; carboxy tail functions to prevent inner gate closures; target of K1 toxin
YMR070W	53.7666	-0.475326	0.480363	NA	53.7666	-0.002499	0.55953	0.999906	53.7666	-0.472827	0.737444	0.999827	MOT3	Nuclear transcription factor with two Cys2-His2 zinc fingers; involved in repression of a subset of hypoxic genes by Rox1p, repression of several DAN/TIR genes during aerobic growth, and repression of ergosterol biosynthetic genes
YLR237W	94.8626	0.341866	0.42755	0.959028	94.8626	0.226397	0.536855	0.999906	94.8626	0.115469	0.686296	0.999827	THI7	Plasma membrane transporter responsible for the uptake of thiamine, member of the major facilitator superfamily of transporters; mutation of human ortholog causes thiamine-responsive megaloblastic anemia
YDR358W	46.3332	-0.232184	0.484638	NA	46.3332	0.529	0.590372	0.999906	46.3332	-0.761185	0.763788	0.999827	GGA1	Golgi-localized protein with homology to gamma-adaptin, interacts with and regulates Arf1p and Arf2p in a GTP-dependent manner in order to facilitate traffic through the late Golgi
YLR116W	41.6343	-0.591902	0.506004	NA	41.6343	-0.409472	0.593241	0.999906	41.6343	-0.182429	0.779727	0.999827	MSL5	Component of the commitment complex, which defines the first step in the splicing pathway; essential protein that interacts with Mud2p and Prp40p, forming a bridge between the intron ends; also involved in nuclear retention of pre-mRNA
YLR350W	88.3927	0.600195	0.420775	0.959028	88.3927	0.044885	0.528912	0.999906	88.3927	0.55531	0.67586	0.999827	ORM2	Evolutionarily conserved protein, similar to Orm1p, required for resistance to agents that induce unfolded protein response; Orm1p and Orm2p together control membrane biogenesis by coordinating lipid homeostasis with protein quality control
YHL019C	45.4356	-0.265621	0.45481	NA	45.4356	0.0148903	0.55646	0.999906	45.4356	-0.280511	0.71867	0.999827	APM2	Protein of unknown function, homologous to the medium chain of mammalian clathrin-associated protein complex; involved in vesicular transport
YKL092C	45.0187	-0.340201	0.456791	NA	45.0187	-0.193662	0.554348	0.999906	45.0187	-0.146539	0.718302	0.999827	BUD2	GTPase activating factor for Rsr1p/Bud1p required for both axial and bipolar budding patterns; mutants exhibit random budding in all cell types
YJL138C	3368.37	0.595074	0.335157	0.959028	3368.37	-0.265939	0.442744	0.999906	3368.37	0.861013	0.555294	0.999827	TIF2	Translation initiation factor eIF4A, identical to Tif1p; DEA(D/H)-box RNA helicase that couples ATPase activity to RNA binding and unwinding; forms a dumbbell structure of two compact domains connected by a linker; interacts with eIF4G
YDR394W	218.03	0.249473	0.305828	0.959028	218.03	0.276179	0.419732	0.999906	218.03	-0.0267062	0.519324	0.999827	RPT3	One of six ATPases of the 19S regulatory particle of the 26S proteasome involved in the degradation of ubiquitinated substrates; substrate of N-acetyltransferase B
YEL050C	44.5615	0.0315794	0.466709	NA	44.5615	-0.0286271	0.564459	0.999906	44.5615	0.0602065	0.732403	0.999827	RML2	Mitochondrial ribosomal protein of the large subunit, has similarity to E. coli L2 ribosomal protein; fat21 mutant allele causes inability to utilize oleate and may interfere with activity of the Adr1p transcription factor
YOR317W	659.169	0.0955536	0.295284	0.992604	659.169	0.264015	0.40418	0.999906	659.169	-0.168461	0.500553	0.999827	FAA1	Long chain fatty acyl-CoA synthetase, activates imported fatty acids with a preference for C12:0-C16:0 chain lengths; functions in long chain fatty acid import; accounts for most acyl-CoA synthetase activity; localized to lipid particles
YMR153W	46.3007	-0.178481	0.436047	NA	46.3007	-0.194107	0.543708	0.999906	46.3007	0.0156263	0.696959	0.999827	NUP53	Subunit of the nuclear pore complex (NPC), interacts with karyopherin Kap121p or with Nup170p via overlapping regions of Nup53p, involved in activation of the spindle checkpoint mediated by the Mad1p-Mad2p complex
YDL015C	147.138	0.72282	0.340437	0.829774	147.138	-0.0333201	0.445394	0.999906	147.138	0.75614	0.560592	0.999827	TSC13	Enoyl reductase that catalyzes the last step in each cycle of very long chain fatty acid elongation, localizes to the ER, highly enriched in a structure marking nuclear-vacuolar junctions, coimmunoprecipitates with elongases Fen1p and Sur4p
YJL225C	54.5473	-0.342785	0.499642	NA	54.5473	-0.0742133	0.550755	0.999906	54.5473	-0.268572	0.743618	0.999827		Putative protein of unknown function; similarity to DNA helicases that are also encoded within subtelomeric Y' elements and induced in telomerase deficient survivors
YLR390W-A	999.095	0.476232	0.324675	0.959028	999.095	0.149478	0.432438	0.999906	999.095	0.326754	0.540755	0.999827	CCW14	Covalently linked cell wall glycoprotein, present in the inner layer of the cell wall
YMR315W	449.073	1.27251	0.323759	0.0308219	449.073	1.1208	0.437139	0.999906	449.073	0.151714	0.543962	0.999827		Protein with NADP(H) oxidoreductase activity; transcription is regulated by Stb5p in response to NADPH depletion induced by diamide; promoter contains a putative Stb5p binding site
YNL079C	840.524	-0.612448	0.375467	0.959028	840.524	0.310672	0.49289	0.999906	840.524	-0.923121	0.61961	0.999827	TPM1	Major isoform of tropomyosin; binds to and stabilizes actin cables and filaments, which direct polarized cell growth and the distribution of several organelles; acetylated by the NatB complex and acetylated form binds actin most efficiently
YPL150W	36.1155	-0.735509	0.50348	NA	36.1155	-0.560111	0.584248	0.999906	36.1155	-0.175397	0.771246	0.999827		Putative protein kinase of unknown cellular role
YMR214W	159.258	0.353848	0.317669	0.959028	159.258	-0.132206	0.443409	0.999906	159.258	0.486054	0.545455	0.999827	SCJ1	One of several homologs of bacterial chaperone DnaJ, located in the ER lumen where it cooperates with Kar2p to mediate maturation of proteins
YNR015W	84.8656	0.0127556	0.386829	0.996693	84.8656	0.0546425	0.500043	0.999906	84.8656	-0.0418869	0.632197	0.999827	SMM1	Dihydrouridine synthase, member of a family of dihydrouridine synthases including Dus1p, Smm1p, Dus3p, and Dus4p; modifies uridine residues at position 20 of cytoplasmic tRNAs
YPL235W	169.339	0.153744	0.353857	0.992604	169.339	-0.156459	0.472095	0.999906	169.339	0.310203	0.589989	0.999827	RVB2	Essential protein involved in transcription regulation; component of chromatin remodeling complexes; required for assembly and function of the INO80 complex; also referred to as reptin; member of the RUVB-like protein family
YCL030C	361.099	0.386451	0.281117	0.959028	361.099	0.135801	0.38664	0.999906	361.099	0.25065	0.478031	0.999827	HIS4	Multifunctional enzyme containing phosphoribosyl-ATP pyrophosphatase, phosphoribosyl-AMP cyclohydrolase, and histidinol dehydrogenase activities; catalyzes the second, third, ninth and tenth steps in histidine biosynthesis
YBL075C	28.4319	0.528869	0.584988	NA	28.4319	-0.0690016	0.641602	0.999906	28.4319	0.597871	0.86824	0.999827	SSA3	ATPase involved in protein folding and the response to stress; plays a role in SRP-dependent cotranslational protein-membrane targeting and translocation; member of the heat shock protein 70 (HSP70) family; localized to the cytoplasm
YEL036C	245.209	-0.847073	0.365246	0.735749	245.209	-0.134146	0.478578	0.999906	245.209	-0.712927	0.602031	0.999827	ANP1	Subunit of the alpha-1,6 mannosyltransferase complex; type II membrane protein; has a role in retention of glycosyltransferases in the Golgi; involved in osmotic sensitivity and resistance to aminonitrophenyl propanediol
YLR413W	325.214	-0.766734	0.370502	0.833522	325.214	-0.793509	0.479086	0.999906	325.214	0.0267759	0.605635	0.999827		Putative protein of unknown function; YLR413W is not an essential gene
YJR132W	151.664	-0.423224	0.351171	0.959028	151.664	-0.0551676	0.45984	0.999906	151.664	-0.368056	0.578597	0.999827	NMD5	Karyopherin, a carrier protein involved in nuclear import of proteins; importin beta homolog
YAL032C	27.3893	0.335806	0.546405	NA	27.3893	0.594795	0.613062	0.999906	27.3893	-0.258989	0.821098	0.999827	PRP45	Protein required for pre-mRNA splicing; associates with the spliceosome and interacts with splicing factors Prp22p and Prp46p; orthologous to human transcriptional coactivator SKIP and can activate transcription of a reporter gene
YLR017W	142.507	0.299618	0.439032	0.967178	142.507	0.0783747	0.550004	0.999906	142.507	0.221243	0.70374	0.999827	MEU1	Methylthioadenosine phosphorylase (MTAP), catalyzes the initial step in the methionine salvage pathway; affects polyamine biosynthesis through regulation of ornithine decarboxylase (Spe1p) activity; regulates ADH2 gene expression
YLR372W	452.865	0.39396	0.359427	0.959028	452.865	0.200366	0.470658	0.999906	452.865	0.193594	0.592204	0.999827	SUR4	Elongase, involved in fatty acid and sphingolipid biosynthesis; synthesizes very long chain 20-26-carbon fatty acids from C18-CoA primers; involved in regulation of sphingolipid biosynthesis
YJL039C	248.921	0.121271	0.320653	0.992604	248.921	-0.192489	0.421418	0.999906	248.921	0.313759	0.529538	0.999827	NUP192	Essential structural subunit of the nuclear pore complex (NPC), localizes to the nuclear periphery of nuclear pores, homologous to human p205
YNL302C	1578.66	0.0432376	0.272485	0.992604	1578.66	-0.0515284	0.371265	0.999906	1578.66	0.0947661	0.460527	0.999827	RPS19B	Protein component of the small (40S) ribosomal subunit, required for assembly and maturation of pre-40 S particles; mutations in human RPS19 are associated with Diamond Blackfan anemia; nearly identical to Rps19Ap
YGR094W	1672.01	0.0486657	0.24965	0.992604	1672.01	0.126176	0.341689	0.999906	1672.01	-0.0775108	0.423174	0.999827	VAS1	Mitochondrial and cytoplasmic valyl-tRNA synthetase
YHR211W	25.7868	0.0721372	0.612861	NA	25.7868	0.00564583	0.636116	0.999906	25.7868	0.0664914	0.883286	0.999827	FLO5	Lectin-like cell wall protein (flocculin) involved in flocculation, binds to mannose chains on the surface of other cells, confers floc-forming ability that is chymotrypsin resistant but heat labile; similar to Flo1p
YIR012W	224.626	-0.333216	0.311273	0.959028	224.626	-0.0757282	0.424688	0.999906	224.626	-0.257488	0.526546	0.999827	SQT1	Essential protein involved in a late step of 60S ribosomal subunit assembly or modification; contains multiple WD repeats; interacts with Qsr1p in a two-hybrid assay
YDL235C	89.1718	-0.209733	0.373543	0.982129	89.1718	0.201168	0.502942	0.999906	89.1718	-0.410902	0.62648	0.999827	YPD1	Phosphorelay intermediate protein, phosphorylated by the plasma membrane sensor Sln1p in response to osmotic stress and then in turn phosphorylates the response regulators Ssk1p in the cytosol and Skn7p in the nucleus
YJL192C	92.5548	0.127445	0.378309	0.992604	92.5548	0.463979	0.494837	0.999906	92.5548	-0.336534	0.622859	0.999827	SOP4	ER-membrane protein; suppressor of pma1-7, deletion of SOP4 slows down the export of wild-type Pma1p and Pma1-7 from the ER
YDL083C	1112.78	0.123829	0.275591	0.992604	1112.78	-0.00921891	0.376845	0.999906	1112.78	0.133048	0.466864	0.999827	RPS16B	Protein component of the small (40S) ribosomal subunit; identical to Rps16Ap and has similarity to E. coli S9 and rat S16 ribosomal proteins
YMR250W	214.207	0.405856	0.6122	0.967178	214.207	0.156483	0.646	0.999906	214.207	0.249373	0.890002	0.999827	GAD1	Glutamate decarboxylase, converts glutamate into gamma-aminobutyric acid (GABA) during glutamate catabolism; involved in response to oxidative stress
YOR014W	147.77	-0.309128	0.328209	0.959028	147.77	-0.218995	0.426353	0.999906	147.77	-0.0901337	0.53805	0.999827	RTS1	B-type regulatory subunit of protein phosphatase 2A (PP2A); homolog of the mammalian B' subunit of PP2A
YLR134W	1228.99	0.629118	0.281528	0.804807	1228.99	0.890612	0.419263	0.999906	1228.99	-0.261494	0.50501	0.999827	PDC5	Minor isoform of pyruvate decarboxylase, key enzyme in alcoholic fermentation, decarboxylates pyruvate to acetaldehyde, regulation is glucose- and ethanol-dependent, repressed by thiamine, involved in amino acid catabolism
YNL169C	75.2687	-0.297685	0.371436	0.959028	75.2687	-0.0797231	0.489131	0.999906	75.2687	-0.217962	0.614176	0.999827	PSD1	Phosphatidylserine decarboxylase of the mitochondrial inner membrane, converts phosphatidylserine to phosphatidylethanolamine
YKL209C	160.828	-0.229066	0.347285	0.967178	160.828	0.144307	0.45617	0.999906	160.828	-0.373373	0.57332	0.999827	STE6	Plasma membrane ATP-binding cassette (ABC) transporter required for the export of a-factor, catalyzes ATP hydrolysis coupled to a-factor transport; contains 12 transmembrane domains and two ATP binding domains; expressed only in MATa cells
YNL068C	56.8425	-0.869795	0.466753	NA	56.8425	-1.04648	0.554564	0.999906	56.8425	0.176687	0.724816	0.999827	FKH2	Forkhead family transcription factor with a major role in the expression of G2/M phase genes; positively regulates transcriptional elongation; negative role in chromatin silencing at HML and HMR; substrate of the Cdc28p/Clb5p kinase
YBL064C	152.866	1.03419	0.405005	0.661057	152.866	0.288591	0.534963	0.999906	152.866	0.745603	0.670945	0.999827	PRX1	Mitochondrial peroxiredoxin (1-Cys Prx) with thioredoxin peroxidase activity, has a role in reduction of hydroperoxides; reactivation requires Trr2p and glutathione; induced during respiratory growth and oxidative stress; phosphorylated
YHR103W	99.5458	-0.137333	0.393996	0.992604	99.5458	0.197615	0.475888	0.999906	99.5458	-0.334949	0.617814	0.999827	SBE22	Protein involved in the transport of cell wall components from the Golgi to the cell surface; similar in structure and functionally redundant with Sbe2p; involved in bud growth
YGL142C	50.4803	-0.578237	0.447268	NA	50.4803	0.201205	0.55767	0.999906	50.4803	-0.779441	0.71488	0.999827	GPI10	Integral membrane protein involved in glycosylphosphatidylinositol (GPI) anchor synthesis; putative alpha 1,2 mannosyltransferase required for addition of the third mannose onto the GPI core structure; human PIG-Bp is a functional homolog
YER069W	126.103	1.12898	0.389133	0.426632	126.103	0.623776	0.500977	0.999906	126.103	0.505202	0.634282	0.999827	ARG5,6	Protein that is processed in the mitochondrion to yield acetylglutamate kinase and N-acetyl-gamma-glutamyl-phosphate reductase, which catalyze the 2nd and 3rd steps in arginine biosynthesis; enzymes form a complex with Arg2p
YLR107W	41.4538	-0.332582	0.52405	NA	41.4538	-0.331241	0.608302	0.999906	41.4538	-0.00134061	0.802908	0.999827	REX3	RNA exonuclease; required for maturation of the RNA component of RNase MRP; functions redundantly with Rnh70p and Rex2p in processing of U5 snRNA and RNase P RNA; member of RNase D family of exonucleases
YMR061W	94.2884	-0.728106	0.360765	0.833522	94.2884	-0.364554	0.465255	0.999906	94.2884	-0.363551	0.588738	0.999827	RNA14	Cleavage and polyadenylation factor I (CF I) component involved in cleavage and polyadenylation of mRNA 3' ends; bridges interaction between Rna15p and Hrp1p in the CF I complex
YOR027W	709.543	0.155717	0.330773	0.992604	709.543	0.342825	0.442881	0.999906	709.543	-0.187108	0.552768	0.999827	STI1	Hsp90 cochaperone, interacts with the Ssa group of the cytosolic Hsp70 chaperones and activates Ssa1p ATPase activity; interacts with Hsp90 chaperones and inhibits their ATPase activity; homolog of mammalian Hop
YLR240W	64.9772	-0.124462	0.411196	NA	64.9772	-0.0464947	0.514258	0.999906	64.9772	-0.0779674	0.658435	0.999827	VPS34	Phosphatidylinositol 3-kinase responsible for the synthesis of phosphatidylinositol 3-phosphate; forms membrane-associated signal transduction complex with Vps15p to regulate protein sorting; activated by the GTP-bound form of Gpa1p
YDR385W	16212.7	0.0601684	0.241251	0.992604	16212.7	0.0596335	0.329767	0.999906	16212.7	0.000534969	0.408593	0.999827	EFT2	Elongation factor 2 (EF-2), also encoded by EFT1; catalyzes ribosomal translocation during protein synthesis; contains diphthamide, the unique posttranslationally modified histidine residue specifically ADP-ribosylated by diphtheria toxin
YJL129C	69.5764	-0.487276	0.442866	0.959028	69.5764	0.1798	0.526845	0.999906	69.5764	-0.667076	0.688256	0.999827	TRK1	Component of the Trk1p-Trk2p potassium transport system; 180 kDa high affinity potassium transporter; phosphorylated in vivo and interacts physically with the phosphatase Ppz1p, suggesting Trk1p acitivy is regulated by phosphorylation
YML049C	88.6088	0.125354	0.397264	0.992604	88.6088	0.0469043	0.506784	0.999906	88.6088	0.0784493	0.643924	0.999827	RSE1	Protein involved in pre-mRNA splicing; component of the pre-spliceosome; associates with U2 snRNA; involved in ER to Golgi transport
YLR143W	53.64	-0.464657	0.486116	NA	53.64	-0.00144297	0.586321	0.999906	53.64	-0.463214	0.76163	0.999827		Putative protein of unknown function; green fluorescent protein (GFP)-tagged protein localizes to the cytoplasm; YLR143W is not an essential gene
YOR063W	5739.36	-0.31181	0.260026	0.959028	5739.36	-0.0547811	0.35365	0.999906	5739.36	-0.257029	0.438955	0.999827	RPL3	Protein component of the large (60S) ribosomal subunit, has similarity to E. coli L3 and rat L3 ribosomal proteins; involved in the replication and maintenance of killer double stranded RNA virus
YPL218W	415.805	0.376429	0.265355	0.959028	415.805	0.182609	0.374174	0.999906	415.805	0.19382	0.458712	0.999827	SAR1	GTPase, GTP-binding protein of the ARF family, component of COPII coat of vesicles; required for transport vesicle formation during ER to Golgi protein transport
YDL224C	61.4723	0.1047	0.418331	NA	61.4723	-0.190159	0.515629	0.999906	61.4723	0.29486	0.663978	0.999827	WHI4	Putative RNA binding protein and partially redundant Whi3p homolog that regulates the cell size requirement for passage through Start and commitment to cell division
YKR067W	81.5665	0.514669	0.394054	0.959028	81.5665	0.350886	0.505084	0.999906	81.5665	0.163783	0.640575	0.999827	GPT2	Glycerol-3-phosphate/dihydroxyacetone phosphate dual substrate-specific sn-1 acyltransferase located in lipid particles and the ER; involved in the stepwise acylation of glycerol-3-phosphate and dihydroxyacetone in lipid biosynthesis
YFL024C	100.131	-0.301853	0.378349	0.959028	100.131	-0.373686	0.475878	0.999906	100.131	0.071833	0.607954	0.999827	EPL1	Component of NuA4, which is an essential histone H4/H2A acetyltransferase complex; homologous to Drosophila Enhancer of Polycomb
YHR200W	239.899	-0.263888	0.311154	0.959028	239.899	0.613762	0.430765	0.999906	239.899	-0.87765	0.531387	0.999827	RPN10	Non-ATPase base subunit of the 19S regulatory particle (RP) of the 26S proteasome; N-terminus plays a role in maintaining the structural integrity of the RP; binds selectively to polyubiquitin chains; homolog of the mammalian S5a protein
YMR124W	70.0188	-0.0339803	0.447478	0.992604	70.0188	-0.321873	0.542717	0.999906	70.0188	0.287893	0.703406	0.999827		Protein of unknown function; GFP-fusion protein localizes to the cell periphery, cytoplasm, bud, and bud neck; interacts with Crm1p in two-hybrid assay; YMR124W is not an essential gene; predicted to have a role in organelle organization
YOL087C	68.7258	-0.308565	0.409494	0.962661	68.7258	-0.0534389	0.509535	0.999906	68.7258	-0.255126	0.653687	0.999827		Putative protein of unknown function; green fluorescent protein (GFP)-fusion protein localizes to the cytoplasm; deletion mutant is sensitive to various chemicals including phenanthroline, sanguinarine, and nordihydroguaiaretic acid
YPL260W	140.402	-0.357246	0.375724	0.959028	140.402	-0.047419	0.492103	0.999906	140.402	-0.309827	0.619139	0.999827		Putative substrate of cAMP-dependent protein kinase (PKA); green fluorescent protein (GFP)-fusion protein localizes to the cytoplasm and nucleus; YPL260W is not an essential gene
YKL128C	79.5472	0.262837	0.394485	0.967178	79.5472	0.0944419	0.488757	0.999906	79.5472	0.168395	0.62808	0.999827	PMU1	Putative phosphomutase, contains a region homologous to the active site of phosphomutases; overexpression suppresses the histidine auxotrophy of an ade3 ade16 ade17 triple mutant and the temperature sensitivity of a tps2 mutant
YMR304W	176.476	0.28242	0.36323	0.959028	176.476	0.170444	0.480831	0.999906	176.476	0.111975	0.602598	0.999827	UBP15	Ubiquitin-specific protease that may play a role in ubiquitin precursor processing
YDR450W	1359.9	-0.382439	0.293918	0.959028	1359.9	0.0893638	0.398247	0.999906	1359.9	-0.471803	0.494964	0.999827	RPS18A	Protein component of the small (40S) ribosomal subunit; nearly identical to Rps18Bp and has similarity to E. coli S13 and rat S18 ribosomal proteins
YKL029C	209.064	0.303558	0.393612	0.961871	209.064	0.140044	0.506379	0.999906	209.064	0.163514	0.641364	0.999827	MAE1	Mitochondrial malic enzyme, catalyzes the oxidative decarboxylation of malate to pyruvate, which is a key intermediate in sugar metabolism and a precursor for synthesis of several amino acids
YJR123W	4024.35	-0.0329841	0.248146	0.992604	4024.35	0.0462649	0.339583	0.999906	4024.35	-0.079249	0.420586	0.999827	RPS5	Protein component of the small (40S) ribosomal subunit, the least basic of the non-acidic ribosomal proteins; phosphorylated in vivo; essential for viability; has similarity to E. coli S7 and rat S5 ribosomal proteins
YHL008C	55.6305	-0.630424	0.464591	NA	55.6305	0.248311	0.560043	0.999906	55.6305	-0.878735	0.727672	0.999827		Putative protein of unknown function, may be involved in the uptake of chloride ions; does not appear to be involved in monocarboxylic acid transport; green fluorescent protein (GFP)-fusion protein localizes to the vacuole
YNL284C	74.6091	-0.195375	0.410806	0.992604	74.6091	-0.0937928	0.533229	0.999906	74.6091	-0.101582	0.67312	0.999827	MRPL10	Mitochondrial ribosomal protein of the large subunit; appears as two protein spots (YmL10 and YmL18) on two-dimensional SDS gels
YJL208C	52.5881	-0.0968954	0.408784	NA	52.5881	-0.0552258	0.52596	0.999906	52.5881	-0.0416696	0.666128	0.999827	NUC1	Major mitochondrial nuclease, has RNAse and DNA endo- and exonucleolytic activities; has roles in mitochondrial recombination, apoptosis and maintenance of polyploidy
YOR140W	41.5771	0.0710296	0.490338	NA	41.5771	0.132273	0.575456	0.999906	41.5771	-0.0612437	0.756011	0.999827	SFL1	Transcriptional repressor and activator; involved in repression of flocculation-related genes, and activation of stress responsive genes; negatively regulated by cAMP-dependent protein kinase A subunit Tpk2p
YDR068W	81.3117	-0.369208	0.393	0.959028	81.3117	0.0514401	0.519284	0.999906	81.3117	-0.420649	0.651232	0.999827	DOS2	Protein of unknown function, green fluorescent protein (GFP)-fusion protein localizes to the cytoplasm
YMR043W	96.3486	-0.674582	0.40522	0.959028	96.3486	0.0227369	0.515344	0.999906	96.3486	-0.697319	0.655581	0.999827	MCM1	Transcription factor involved in cell-type-specific transcription and pheromone response; plays a central role in the formation of both repressor and activator complexes
YLR060W	980.45	0.0202376	0.322335	0.992952	980.45	0.124025	0.428864	0.999906	980.45	-0.103787	0.536493	0.999827	FRS1	Beta subunit of cytoplasmic phenylalanyl-tRNA synthetase, forms a tetramer with Frs2p to generate active enzyme; able to hydrolyze mis-aminoacylated tRNA-Phe, which could contribute to translational quality control
YLL048C	608.917	0.0412201	0.312631	0.992604	608.917	0.213909	0.413961	0.999906	608.917	-0.172689	0.51875	0.999827	YBT1	Transporter of the ATP-binding cassette (ABC) family involved in bile acid transport; similar to mammalian bile transporters
YNL248C	152.091	-0.298781	0.361055	0.959028	152.091	0.136914	0.472962	0.999906	152.091	-0.435695	0.595024	0.999827	RPA49	RNA polymerase I subunit A49
YCR081W	47.6498	0.48453	0.467612	NA	47.6498	-0.116792	0.563141	0.999906	47.6498	0.601321	0.73196	0.999827	SRB8	Subunit of the RNA polymerase II mediator complex; associates with core polymerase subunits to form the RNA polymerase II holoenzyme; essential for transcriptional regulation; involved in glucose repression
YEL063C	153.531	0.0922909	0.319224	0.992604	153.531	0.276657	0.436281	0.999906	153.531	-0.184366	0.540589	0.999827	CAN1	Plasma membrane arginine permease, requires phosphatidyl ethanolamine (PE) for localization, exclusively associated with lipid rafts; mutation confers canavanine resistance
YDL040C	313.361	0.0679202	0.280403	0.992604	313.361	0.329989	0.38288	0.999906	313.361	-0.262069	0.474574	0.999827	NAT1	Subunit of the N-terminal acetyltransferase NatA (Nat1p, Ard1p, Nat5p); N-terminally acetylates many proteins, which influences multiple processes such as the cell cycle, heat-shock resistance, mating, sporulation, and telomeric silencing
YLR420W	227.717	0.148751	0.394561	0.992604	227.717	-0.163133	0.51108	0.999906	227.717	0.311883	0.645663	0.999827	URA4	Dihydroorotase, catalyzes the third enzymatic step in the de novo biosynthesis of pyrimidines, converting carbamoyl-L-aspartate into dihydroorotate
YJR066W	189.921	0.00353853	0.323734	0.999066	189.921	0.257576	0.421385	0.999906	189.921	-0.254037	0.53138	0.999827	TOR1	PIK-related protein kinase and rapamycin target; subunit of TORC1, a complex that controls growth in response to nutrients by regulating translation, transcription, ribosome biogenesis, nutrient transport and autophagy; involved in meiosis
YHR121W	61.7053	-0.531825	0.413211	NA	61.7053	-0.579528	0.535951	0.999906	61.7053	0.0477031	0.676745	0.999827	LSM12	Protein of unknown function that may function in RNA processing; interacts with Pbp1p and Pbp4p and associates with ribosomes; contains an RNA-binding LSM domain and an AD domain; GFP-fusion protein is induced by the DNA-damaging agent MMS
YIR003W	101.485	-0.00177104	0.379013	1	101.485	0.12742	0.490899	0.999906	101.485	-0.129191	0.62018	0.999827	AIM21	Protein of unknown function involved in mitochondrial migration along actin filament; may interact with ribosomes; GFP-fusion protein colocalizes with Sac1p to the actin cytoskeleton
YHR020W	920.219	-0.0882566	0.252841	0.992604	920.219	0.126818	0.34756	0.999906	920.219	-0.215075	0.429799	0.999827		Protein of unknown function that may interact with ribosomes, based on co-purification experiments; has similarity to proline-tRNA ligase; YHR020W is an essential gene
YLR226W	31.3902	-0.158623	0.508811	NA	31.3902	-0.276337	0.597454	0.999906	31.3902	0.117715	0.784755	0.999827	BUR2	Cyclin for the Sgv1p (Bur1p) protein kinase; Sgv1p and Bur2p comprise a CDK-cyclin complex involved in transcriptional regulation through its phosphorylation of the carboxy-terminal domain of the largest subunit of RNA polymerase II
YMR241W	192.282	0.449256	0.318756	0.959028	192.282	-0.151672	0.438254	0.999906	192.282	0.600928	0.541912	0.999827	YHM2	Carrier protein that exports citrate from and imports oxoglutarate into the mitochondrion, causing net export of NADPH reducing equivalents; also associates with mt nucleoids and has a role in replication and segregation of the mt genome
YJL198W	162.117	-0.0303827	0.351229	0.992604	162.117	-0.168373	0.463704	0.999906	162.117	0.13799	0.581707	0.999827	PHO90	Low-affinity phosphate transporter; deletion of pho84, pho87, pho89, pho90, and pho91 causes synthetic lethality; transcription independent of Pi and Pho4p activity; overexpression results in vigorous growth
YOR298C-A	341.57	0.373308	0.306654	0.959028	341.57	-0.147506	0.411555	0.999906	341.57	0.520815	0.513238	0.999827	MBF1	Transcriptional coactivator that bridges the DNA-binding region of Gcn4p and TATA-binding protein Spt15p; suppressor of frameshift mutations
YGL103W	1623.1	0.111483	0.245211	0.992604	1623.1	0.044735	0.335466	0.999906	1623.1	0.0667475	0.415531	0.999827	RPL28	Ribosomal protein of the large (60S) ribosomal subunit, has similarity to E. coli L15 and rat L27a ribosomal proteins; may have peptidyl transferase activity; can mutate to cycloheximide resistance
YGL195W	1574.82	-0.0157607	0.247013	0.992952	1574.82	0.165751	0.337769	0.999906	1574.82	-0.181512	0.418453	0.999827	GCN1	Positive regulator of the Gcn2p kinase activity, forms a complex with Gcn20p; proposed to stimulate Gcn2p activation by an uncharged tRNA
YFR053C	1483.69	0.492544	0.592301	0.959028	1483.69	0.352792	0.644347	0.999906	1483.69	0.139752	0.875216	0.999827	HXK1	Hexokinase isoenzyme 1, a cytosolic protein that catalyzes phosphorylation of glucose during glucose metabolism; expression is highest during growth on non-glucose carbon sources; glucose-induced repression involves the hexokinase Hxk2p
YDR217C	56.5543	-0.408027	0.42656	NA	56.5543	-0.205192	0.512582	0.999906	56.5543	-0.202835	0.666853	0.999827	RAD9	DNA damage-dependent checkpoint protein, required for cell-cycle arrest in G1/S, intra-S, and G2/M; transmits checkpoint signal by activating Rad53p and Chk1p; hyperphosphorylated by Mec1p and Tel1p; potential Cdc28p substrate
YLL035W	47.8	-0.030455	0.456583	NA	47.8	-0.27611	0.545915	0.999906	47.8	0.245655	0.711682	0.999827	GRC3	Polynucleotide kinase present on rDNA that is required for efficient transcription termination by RNA polymerase I; required for cell growth; mRNA is cell-cycle regulated
YLR059C	74.8159	-0.0340172	0.383357	0.992604	74.8159	-0.264705	0.495844	0.999906	74.8159	0.230687	0.626757	0.999827	REX2	3'-5' RNA exonuclease; involved in 3'-end processing of U4 and U5 snRNAs, 5S and 5.8S rRNAs, and RNase P and RNase MRP RNA; localized to mitochondria and null suppresses escape of mtDNA to nucleus in yme1 yme2 mutants; RNase D exonuclease
YOL115W	58.8782	-0.155676	0.433743	NA	58.8782	0.0694547	0.532033	0.999906	58.8782	-0.225131	0.686426	0.999827	PAP2	Non-canonical poly(A) polymerase, involved in nuclear RNA degradation as a component of the TRAMP complex; catalyzes polyadenylation of hypomodified tRNAs, and snoRNA and rRNA precursors; overlapping but non-redundant functions with Trf5p
YDR051C	55.9032	0.327846	0.446702	NA	55.9032	-0.0521117	0.550347	0.999906	55.9032	0.379958	0.708803	0.999827	DET1	Acid phosphatase involved in the non-vesicular transport of sterols in both directions between the endoplasmic reticulum and plasma membrane; deletion confers sensitivity to nickel
YGR250C	74.3661	-0.161244	0.41432	0.992604	74.3661	0.449149	0.499626	0.999906	74.3661	-0.610393	0.649045	0.999827		Putative RNA binding protein; localizes to stress granules induced by glucose deprivation; interacts with Rbg1p in a two-hybrid
YKR092C	233.511	-0.348545	0.319437	0.959028	233.511	-0.594939	0.428419	0.999906	233.511	0.246393	0.5344	0.999827	SRP40	Nucleolar, serine-rich protein with a role in preribosome assembly or transport; may function as a chaperone of small nucleolar ribonucleoprotein particles (snoRNPs); immunologically and structurally to rat Nopp140
YJL033W	148.985	-0.405206	0.370365	0.959028	148.985	-0.101836	0.484438	0.999906	148.985	-0.303369	0.609795	0.999827	HCA4	Putative nucleolar DEAD box RNA helicase; high-copy number suppression of a U14 snoRNA processing mutant suggests an involvement in 18S rRNA synthesis
YML070W	474.256	0.625533	0.325246	0.89785	474.256	0.603482	0.450616	0.999906	474.256	0.0220511	0.555727	0.999827	DAK1	Dihydroxyacetone kinase, required for detoxification of dihydroxyacetone (DHA); involved in stress adaptation
YBR130C	51.7891	0.218681	0.437011	NA	51.7891	-0.24457	0.539807	0.999906	51.7891	0.463251	0.694526	0.999827	SHE3	Protein that acts as an adaptor between Myo4p and the She2p-mRNA complex; part of the mRNA localization machinery that restricts accumulation of certain proteins to the bud; also required for cortical ER inheritance
YLR095C	123.703	-0.240229	0.386629	0.976106	123.703	0.124632	0.494623	0.999906	123.703	-0.364862	0.627799	0.999827	IOC2	Member of a complex (Isw1b) with Isw1p and Ioc4p that exhibits nucleosome-stimulated ATPase activity and acts within coding regions to coordinate transcription elongation with termination and processing, contains a PHD finger motif
YDR411C	88.5842	0.615029	0.378594	0.959028	88.5842	0.149579	0.505659	0.999906	88.5842	0.46545	0.631647	0.999827	DFM1	ER localized derlin-like family member involved in ER stress and homeostasis; not involved in ERAD or substrate retrotranslocation; interacts with CDC48; contains four transmembrane domains and two SHP boxes
YML117W	152.984	-0.446171	0.334509	0.959028	152.984	-0.245395	0.436153	0.999906	152.984	-0.200776	0.54966	0.999827	NAB6	Putative RNA-binding protein that associates with mRNAs encoding cell wall proteins in high-throughput studies; deletion mutants display increased sensitivity to some cell wall disrupting agents; expression negatively regulated by cAMP
YNL073W	33.0224	-0.516093	0.542587	NA	33.0224	0.206374	0.618555	0.999906	33.0224	-0.722467	0.82281	0.999827	MSK1	Mitochondrial lysine-tRNA synthetase, required for import of both aminoacylated and deacylated forms of tRNA(Lys) into mitochondria and for aminoacylation of mitochondrially encoded tRNA(Lys)
YDR370C	25.0929	-0.363075	0.571665	NA	25.0929	-0.0632798	0.621898	0.999906	25.0929	-0.299795	0.84472	0.999827		Putative protein of unknown function
YMR296C	253.074	0.271219	0.3028	0.959028	253.074	0.153104	0.40579	0.999906	253.074	0.118115	0.50631	0.999827	LCB1	Component of serine palmitoyltransferase, responsible along with Lcb2p for the first committed step in sphingolipid synthesis, which is the condensation of serine with palmitoyl-CoA to form 3-ketosphinganine
YAL038W	19602.7	0.228485	0.239495	0.959028	19602.7	0.190483	0.327623	0.999906	19602.7	0.0380014	0.405826	0.999827	CDC19	Pyruvate kinase, functions as a homotetramer in glycolysis to convert phosphoenolpyruvate to pyruvate, the input for aerobic (TCA cycle) or anaerobic (glucose fermentation) respiration
YOL151W	228.464	1.17676	0.451334	0.64828	228.464	1.1937	0.570913	0.999906	228.464	-0.016939	0.727735	0.999827	GRE2	3-methylbutanal reductase and NADPH-dependent methylglyoxal reductase (D-lactaldehyde dehydrogenase); stress induced (osmotic, ionic, oxidative, heat shock and heavy metals); regulated by the HOG pathway
YLR378C	970.923	0.47316	0.315105	0.959028	970.923	0.339517	0.420287	0.999906	970.923	0.133643	0.525292	0.999827	SEC61	Essential subunit of Sec61 complex (Sec61p, Sbh1p, and Sss1p); forms a channel for SRP-dependent protein import and retrograde transport of misfolded proteins out of the ER; with Sec63 complex allows SRP-independent protein import into ER
YOL036W	71.0336	-0.134943	0.41359	0.992604	71.0336	0.0770863	0.498829	0.999906	71.0336	-0.21203	0.647979	0.999827		Protein of unknown function; potential Cdc28p substrate
YHR019C	1295.91	0.188683	0.251849	0.962661	1295.91	0.189828	0.345266	0.999906	1295.91	-0.00114519	0.42736	0.999827	DED81	Cytosolic asparaginyl-tRNA synthetase, required for protein synthesis, catalyzes the specific attachment of asparagine to its cognate tRNA
YKR038C	68.3453	-0.127667	0.423507	0.992604	68.3453	-0.241295	0.521534	0.999906	68.3453	0.113628	0.671829	0.999827	KAE1	Highly conserved putative glycoprotease proposed to be involved in transcription as a component of the EKC protein complex with Bud32p, Cgi121p, Pcc1p, and Gon7p; also identified as a component of the KEOPS protein complex
YJL099W	34.0851	-0.0126784	0.494194	NA	34.0851	-0.301825	0.582503	0.999906	34.0851	0.289146	0.763898	0.999827	CHS6	Member of the ChAPs family of proteins (Chs5p-Arf1p-binding proteins: Bch1p, Bch2p, Bud7p, Chs6p), that forms the exomer complex with Chs5p to mediate export of specific cargo proteins, including Chs3p, from the Golgi to the plasma membrane
YGL058W	109.93	0.221463	0.358788	0.979138	109.93	-0.0939273	0.49437	0.999906	109.93	0.31539	0.610838	0.999827	RAD6	Ubiquitin-conjugating enzyme (E2), involved in postreplication repair (as a heterodimer with Rad18p), DSBR and checkpoint control (as a heterodimer with Bre1p), ubiquitin-mediated N-end rule protein degradation (as a heterodimer with Ubr1p
YCR030C	158.676	0.426229	0.365566	0.959028	158.676	-0.235555	0.474473	0.999906	158.676	0.661784	0.598967	0.999827	SYP1	Protein of unknown function that is involved in endocytic site formation; may regulate assembly and disassembly of the septin ring; colocalizes and interacts with septin subunits; potential role in actin cytoskeletal organization
YPL259C	41.2173	0.0868307	0.495418	NA	41.2173	0.307258	0.581489	0.999906	41.2173	-0.220428	0.763876	0.999827	APM1	Mu1-like medium subunit of the clathrin-associated protein complex (AP-1); binds clathrin; involved in clathrin-dependent Golgi protein sorting
YGR117C	60.5841	-0.0996402	0.423591	NA	60.5841	0.063977	0.524048	0.999906	60.5841	-0.163617	0.673822	0.999827		Putative protein of unknown function; green fluorescent protein (GFP)-fusion protein localizes to the cytoplasm
YBR112C	205.331	0.238995	0.307606	0.959028	205.331	0.223778	0.401404	0.999906	205.331	0.0152163	0.505709	0.999827	CYC8	General transcriptional co-repressor, acts together with Tup1p; also acts as part of a transcriptional co-activator complex that recruits the SWI/SNF and SAGA complexes to promoters; can form the prion
YLR194C	72.4543	-0.0448893	0.476334	0.992604	72.4543	0.15722	0.579771	0.999906	72.4543	-0.202109	0.750349	0.999827		Structural constituent of the cell wall attached to the plasma membrane by a GPI-anchor; expression is upregulated in response to cell wall stress
YDL178W	103.227	0.133093	0.365092	0.992604	103.227	0.351956	0.491621	0.999906	103.227	-0.218863	0.612341	0.999827	DLD2	D-lactate dehydrogenase, located in the mitochondrial matrix
YNL172W	79.4027	-0.430971	0.409719	0.959028	79.4027	-0.376027	0.507488	0.999906	79.4027	-0.0549439	0.652238	0.999827	APC1	Largest subunit of the Anaphase-Promoting Complex/Cyclosome (APC/C), which is a ubiquitin-protein ligase required for degradation of anaphase inhibitors, including mitotic cyclins, during the metaphase/anaphase transition
YKL212W	355.537	0.137555	0.280313	0.992604	355.537	0.721802	0.383932	0.999906	355.537	-0.584247	0.475369	0.999827	SAC1	Phosphatidylinositol phosphate (PtdInsP) phosphatase involved in hydrolysis of PtdIns
YCL018W	71.5288	0.756394	0.438117	0.959028	71.5288	0.980607	0.562761	0.999906	71.5288	-0.224213	0.713073	0.999827	LEU2	Beta-isopropylmalate dehydrogenase (IMDH), catalyzes the third step in the leucine biosynthesis pathway
YPR114W	62.9156	-0.316236	0.424903	NA	62.9156	-0.00617975	0.537549	0.999906	62.9156	-0.310056	0.685199	0.999827		Putative protein of unknown function
YJL055W	90.5879	-0.226908	0.379925	0.979138	90.5879	0.384961	0.524311	0.999906	90.5879	-0.611869	0.64748	0.999827		Putative protein of unknown function, proposed to be involved in the metabolism of purine and pyrimidine base analogues; deletion mutants are sensitive to HAP and AHA; overexpression confers resistance to 5-FOA and 5-FU
YER036C	884.414	0.0762451	0.256452	0.992604	884.414	0.00602037	0.352168	0.999906	884.414	0.0702247	0.435649	0.999827	ARB1	ATPase of the ATP-binding cassette (ABC) family involved in 40S and 60S ribosome biogenesis, has similarity to Gcn20p; shuttles from nucleus to cytoplasm, physically interacts with Tif6p, Lsg1p
YER151C	200.17	0.337454	0.319031	0.959028	200.17	-0.163044	0.425602	0.999906	200.17	0.500498	0.531899	0.999827	UBP3	Ubiquitin-specific protease that interacts with Bre5p to co-regulate anterograde and retrograde transport between the ER and Golgi; inhibitor of gene silencing; cleaves ubiquitin fusions but not polyubiquitin; also has mRNA binding activity
YLR158C	70.4047	0	0.615781	1	70.4047	0.407516	0.54674	0.999906	70.4047	-0.686774	0.823451	0.999827	ASP3-3	Cell-wall L-asparaginase II involved in asparagine catabolism; expression induced during nitrogen starvation; ORF contains a short non-coding RNA that enhances expression of full-length gene; reference strain S288C has four copies of ASP3
YLR396C	58.1977	-0.0572979	0.438499	NA	58.1977	-0.0226054	0.533709	0.999906	58.1977	-0.0346925	0.690737	0.999827	VPS33	ATP-binding protein that is a subunit of the HOPS complex and of the CORVET tethering complex; essential for protein sorting, vesicle docking and fusion at the vacuole
YML052W	418.531	-0.640517	0.318341	0.838547	418.531	-0.703375	0.432193	0.999906	418.531	0.0628574	0.536779	0.999827	SUR7	Plasma membrane protein that localizes to furrow-like invaginations (MCC patches); component of eisosomes; associated with endocytosis, along with Pil1p and Lsp1p; sporulation and plasma membrane sphingolipid content are altered in mutants
YIL056W	48.9788	-0.485028	0.480161	NA	48.9788	0.225505	0.566006	0.999906	48.9788	-0.710532	0.742239	0.999827	VHR1	Transcriptional activator, required for the vitamin H-responsive element (VHRE) mediated induction of VHT1 (Vitamin H transporter) and BIO5 (biotin biosynthesis intermediate transporter) in response to low biotin concentrations
YKL067W	199.795	0.402893	0.334756	0.959028	199.795	1.11508	0.470846	0.999906	199.795	-0.712183	0.577689	0.999827	YNK1	Nucleoside diphosphate kinase, catalyzes the transfer of gamma phosphates from nucleoside triphosphates, usually ATP, to nucleoside diphosphates by a mechanism that involves formation of an autophosphorylated enzyme intermediate
YDR224C	483.646	0.309515	0.428315	0.967178	483.646	-0.105096	0.539041	0.999906	483.646	0.414611	0.688491	0.999827	HTB1	Histone H2B, core histone protein required for chromatin assembly and chromosome function; nearly identical to HTB2; Rad6p-Bre1p-Lge1p mediated ubiquitination regulates transcriptional activation, meiotic DSB formation and H3 methylation
YDR026C	30.1108	-0.0416748	0.50497	NA	30.1108	-0.187919	0.58053	0.999906	30.1108	0.146244	0.769415	0.999827		Protein of unknown function that may interact with ribosomes, based on co-purification experiments; Myb-like DNA-binding protein that may bind to the Ter region of rDNA; interacts physically with Fob1p
YOR312C	2215.7	-0.197004	0.272161	0.967178	2215.7	0.0593583	0.37034	0.999906	2215.7	-0.256362	0.45959	0.999827	RPL20B	Protein component of the large (60S) ribosomal subunit, nearly identical to Rpl20Ap and has similarity to rat L18a ribosomal protein
YPL086C	128.401	-0.00670139	0.333289	0.996693	128.401	-0.0874109	0.438542	0.999906	128.401	0.0807095	0.550816	0.999827	ELP3	Subunit of Elongator complex, which is required for modification of wobble nucleosides in tRNA; exhibits histone acetyltransferase activity that is directed to histones H3 and H4; disruption confers resistance to K. lactis zymotoxin
YGR106C	343.734	0.0503886	0.280631	0.992604	343.734	0.157607	0.394456	0.999906	343.734	-0.107219	0.484094	0.999827	VOA1	Endoplasmic reticulum protein that functions, together with other assembly factors, in assembly of the V0 sector of the vacuolar ATPase (V-ATPase); null mutation enhances the V-ATPase deficiency of a vma21 mutant impaired in ER retrieval
YGR241C	63.2467	-0.213214	0.406456	NA	63.2467	-0.158732	0.513999	0.999906	63.2467	-0.0544824	0.655285	0.999827	YAP1802	Protein involved in clathrin cage assembly; binds Pan1p and clathrin; homologous to Yap1801p, member of the AP180 protein family
YDR422C	71.1011	0.283661	0.407391	0.967178	71.1011	0.00378281	0.491322	0.999906	71.1011	0.279878	0.638235	0.999827	SIP1	Alternate beta-subunit of the Snf1p kinase complex, may confer substrate specificity; vacuolar protein containing KIS (Kinase-Interacting Sequence) and ASC (Association with Snf1 kinase Complex) domains involved in protein interactions
YNL242W	43.1856	0.164203	0.477528	NA	43.1856	-0.426057	0.581149	0.999906	43.1856	0.590261	0.752194	0.999827	ATG2	Peripheral membrane protein required for vesicle formation during autophagy, pexophagy, and the cytoplasm-to-vaucole targeting (Cvt) pathway; involved in Atg9p cycling between the phagophore assembly site and mitochondria
YPR062W	256.765	-0.0491492	0.297116	0.992604	256.765	0.0258986	0.404687	0.999906	256.765	-0.0750478	0.502044	0.999827	FCY1	Cytosine deaminase, zinc metalloenzyme that catalyzes the hydrolytic deamination of cytosine to uracil; of biomedical interest because it also catalyzes the deamination of 5-fluorocytosine (5FC) to form anticancer drug 5-fluorouracil (5FU)
YBR222C	151.121	0.225928	0.339426	0.967178	151.121	-0.0183755	0.459742	0.999906	151.121	0.244304	0.57146	0.999827	PCS60	Peroxisomal protein that binds AMP and mRNA, localizes to both the peroxisomal peripheral membrane and matrix, expression is highly inducible by oleic acid, similar to E. coli long chain acyl-CoA synthetase
YCR047C	109.264	-0.355966	0.359387	0.959028	109.264	-0.136169	0.486894	0.999906	109.264	-0.219797	0.605165	0.999827	BUD23	Methyltransferase, methylates residue G1575 of 18S rRNA; required for rRNA processing and nuclear export of 40S ribosomal subunits independently of methylation activity; diploid mutant displays random budding pattern
YDL248W	122.226	-0.105518	0.353374	0.992604	122.226	0.639785	0.478313	0.999906	122.226	-0.745303	0.594675	0.999827	COS7	Protein of unknown function, member of the DUP380 subfamily of conserved, often subtelomerically-encoded proteins; the authentic, non-tagged protein is detected in highly purified mitochondria in high-throughput studies
YBR121C	1401.94	-0.162063	0.257312	0.974648	1401.94	0.0979353	0.354664	0.999906	1401.94	-0.259998	0.438173	0.999827	GRS1	Cytoplasmic and mitochondrial glycyl-tRNA synthase that ligates glycine to the cognate anticodon bearing tRNA; transcription termination factor that may interact with the 3'-end of pre-mRNA to promote 3'-end formation
YLL006W	36.707	-0.566167	0.512524	NA	36.707	-0.363206	0.600493	0.999906	36.707	-0.202961	0.789476	0.999827	MMM1	ER integral membrane protein, component of the ERMES complex that links the ER to mitochondria and may promote inter-organellar calcium and phospholipid exchange as well as coordinating mitochondrial DNA replication and growth
YPR026W	46.3504	0.298636	0.507804	NA	46.3504	0.433732	0.599028	0.999906	46.3504	-0.135096	0.785258	0.999827	ATH1	Acid trehalase required for utilization of extracellular trehalose
YNL141W	70.9226	-0.527042	0.494531	0.959028	70.9226	-0.428911	0.590887	0.999906	70.9226	-0.0981312	0.770524	0.999827	AAH1	Adenine deaminase (adenine aminohydrolase), converts adenine to hypoxanthine; involved in purine salvage; transcriptionally regulated by nutrient levels and growth phase; Aah1p degraded upon entry into quiescence via SCF and the proteasome
YJL145W	63.3375	0.00173345	0.404299	NA	63.3375	-0.154551	0.522107	0.999906	63.3375	0.156285	0.660339	0.999827	SFH5	Non-classical phosphatidylinositol transfer protein (PITP); exhibits PI- but not PC-transfer activity; localizes to the peripheral endoplasmic reticulum, cytosol and microsomes; similar to Sec14p
YPR127W	73.5955	-0.135677	0.375644	0.992604	73.5955	0.198574	0.507559	0.999906	73.5955	-0.334252	0.631433	0.999827		Protein of unknown function, differentially expressed during alcoholic fermentation; expression activated by transcription factor YRM1/YOR172W; green fluorescent protein (GFP)-fusion protein localizes to both the cytoplasm and the nucleus
YGR043C	410.296	1.34878	0.346521	0.0309324	410.296	1.69332	0.473989	0.21747	410.296	-0.344536	0.587119	0.999827	NQM1	Transaldolase of unknown function; transcription is repressed by Mot1p and induced by alpha-factor and during diauxic shift
YDR361C	92.9535	-0.193026	0.38148	0.990954	92.9535	-0.114821	0.498285	0.999906	92.9535	-0.0782054	0.627545	0.999827	BCP1	Essential protein involved in nuclear export of Mss4p, which is a lipid kinase that generates phosphatidylinositol 4,5-biphosphate and plays a role in actin cytoskeleton organization and vesicular transport
YMR287C	32.0718	0.152212	0.522996	NA	32.0718	-0.169888	0.601073	0.999906	32.0718	0.3221	0.796741	0.999827	DSS1	3'-5' exoribonuclease, component of the mitochondrial degradosome along with the ATP-dependent RNA helicase Suv3p; the degradosome associates with the ribosome and mediates turnover of aberrant or unprocessed RNAs
YMR049C	298.484	-0.255193	0.330508	0.961651	298.484	-0.0333399	0.439317	0.999906	298.484	-0.221854	0.549758	0.999827	ERB1	Constituent of 66S pre-ribosomal particles, forms a complex with Nop7p and Ytm1p that is required for maturation of the large ribosomal subunit; required for maturation of the 25S and 5.8S ribosomal RNAs; homologous to mammalian Bop1
YIL021W	86.7978	-0.266676	0.379795	0.967178	86.7978	-0.403318	0.50309	0.999906	86.7978	0.136642	0.630353	0.999827	RPB3	RNA polymerase II third largest subunit B44, part of central core; similar to prokaryotic alpha subunit
YDL086W	102.172	0.310393	0.361912	0.959028	102.172	0.373705	0.49234	0.999906	102.172	-0.0633119	0.611019	0.999827		Putative protein of unknown function; the authentic, non-tagged protein is detected in highly purified mitochondria in high-throughput studies; YDL086W is not an essential gene
YHL002W	53.4077	-0.776438	0.415507	NA	53.4077	-0.454293	0.528795	0.999906	53.4077	-0.322145	0.672504	0.999827	HSE1	Subunit of the endosomal Vps27p-Hse1p complex required for sorting of ubiquitinated membrane proteins into intralumenal vesicles prior to vacuolar degradation, as well as for recycling of Golgi proteins and formation of lumenal membranes
YGL148W	453.947	0.361834	0.28371	0.959028	453.947	0.556327	0.386055	0.999906	453.947	-0.194493	0.47909	0.999827	ARO2	Bifunctional chorismate synthase and flavin reductase, catalyzes the conversion of 5-enolpyruvylshikimate 3-phosphate (EPSP) to form chorismate, which is a precursor to aromatic amino acids
YHR008C	399.124	0.536717	0.399088	0.959028	399.124	0.320197	0.518539	0.999906	399.124	0.21652	0.654332	0.999827	SOD2	Mitochondrial superoxide dismutase, protects cells against oxygen toxicity; phosphorylated
YKR029C	44.475	-0.832158	0.50865	NA	44.475	-0.00709543	0.596084	0.999906	44.475	-0.825063	0.783616	0.999827	SET3	Defining member of the SET3 histone deacetylase complex which is a meiosis-specific repressor of sporulation genes; necessary for efficient transcription by RNAPII; one of two yeast proteins that contains both SET and PHD domains
YDR488C	34.6362	-0.603733	0.487414	NA	34.6362	0.383466	0.578105	0.999906	34.6362	-0.987199	0.756171	0.999827	PAC11	Dynein intermediate chain, acts in the cytoplasmic dynein pathway, forms cortical cytoplasmic microtubule capture site with Num1p; null mutant is defective in nuclear migration, essential in the absence of CIN8
YKL045W	55.2215	-0.592359	0.439192	NA	55.2215	-0.526005	0.550099	0.999906	55.2215	-0.0663544	0.703914	0.999827	PRI2	Subunit of DNA primase, which is required for DNA synthesis and double-strand break repair
YDR105C	63.341	0.247991	0.41328	NA	63.341	0.269223	0.527786	0.999906	63.341	-0.0212318	0.670302	0.999827	TMS1	Vacuolar membrane protein of unknown function that is conserved in mammals; predicted to contain eleven transmembrane helices; interacts with Pdr5p, a protein involved in multidrug resistance
YOL140W	41.0784	0.709749	0.507205	NA	41.0784	0.22117	0.594075	0.999906	41.0784	0.488579	0.781084	0.999827	ARG8	Acetylornithine aminotransferase, catalyzes the fourth step in the biosynthesis of the arginine precursor ornithine
YDR343C	1493.61	0.147293	0.607417	0.992604	1493.61	-0.124468	0.646133	0.999906	1493.61	0.271761	0.886817	0.999827	HXT6	High-affinity glucose transporter of the major facilitator superfamily, nearly identical to Hxt7p, expressed at high basal levels relative to other HXTs, repression of expression by high glucose requires SNF3
YBR002C	45.136	-0.208833	0.440972	NA	45.136	-0.0993113	0.546084	0.999906	45.136	-0.109522	0.701895	0.999827	RER2	Cis-prenyltransferase involved in dolichol synthesis; participates in endoplasmic reticulum (ER) protein sorting
YLR084C	129.276	0.109881	0.388848	0.992604	129.276	-0.256095	0.476823	0.999906	129.276	0.365976	0.615274	0.999827	RAX2	N-glycosylated protein involved in the maintenance of bud site selection during bipolar budding; localization requires Rax1p; RAX2 mRNA stability is regulated by Mpt5p
YHR080C	46.0972	-0.0185172	0.516867	NA	46.0972	0.412918	0.591096	0.999906	46.0972	-0.431435	0.785173	0.999827		Protein of unknown function that may interact with ribosomes, based on co-purification experiments; the authentic, non-tagged protein is detected in highly purified mitochondria in high-throughput studies
YML007W	80.5257	0.452692	0.398207	0.959028	80.5257	0.386442	0.508558	0.999906	80.5257	0.0662498	0.645871	0.999827	YAP1	Basic leucine zipper (bZIP) transcription factor required for oxidative stress tolerance; activated by H2O2 through the multistep formation of disulfide bonds and transit from the cytoplasm to the nucleus; mediates resistance to cadmium
YML106W	283.287	0.240258	0.297537	0.959028	283.287	0.0054411	0.404562	0.999906	283.287	0.234816	0.502192	0.999827	URA5	Major orotate phosphoribosyltransferase (OPRTase) isozyme that catalyzes the fifth enzymatic step in de novo biosynthesis of pyrimidines, converting orotate into orotidine-5'-phosphate; minor OPRTase encoded by URA10
YJL167W	442.793	0.24765	0.295088	0.959028	442.793	0.1404	0.40497	0.999906	442.793	0.107249	0.501075	0.999827	ERG20	Farnesyl pyrophosphate synthetase, has both dimethylallyltranstransferase and geranyltranstransferase activities; catalyzes the formation of C15 farnesyl pyrophosphate units for isoprenoid and sterol biosynthesis
YHR016C	71.41	0.414778	0.437434	0.959028	71.41	0.208664	0.565611	0.999906	71.41	0.206114	0.714976	0.999827	YSC84	Actin-binding protein involved in bundling of actin filaments and endocytosis of actin cortical patches; activity stimulated by Las17p; contains SH3 domain similar to Rvs167p
YPL169C	103.021	-0.102099	0.390043	0.992604	103.021	-0.00514414	0.496876	0.999906	103.021	-0.0969552	0.631675	0.999827	MEX67	Poly(A)RNA binding protein involved in nuclear mRNA export, component of the nuclear pore; ortholog of human TAP
YER027C	78.6619	0.435664	0.399132	0.959028	78.6619	0.0917116	0.513111	0.999906	78.6619	0.343952	0.650044	0.999827	GAL83	One of three possible beta-subunits of the Snf1 kinase complex, allows nuclear localization of the Snf1 kinase complex in the presence of a nonfermentable carbon source; contains glycogen-binding domain
YNL127W	42.5544	-0.683897	0.458005	NA	42.5544	0.391943	0.557975	0.999906	42.5544	-1.07584	0.721893	0.999827	FAR11	Protein involved in recovery from cell cycle arrest in response to pheromone, in a Far1p-independent pathway; interacts with Far3p, Far7p, Far8p, Far9p, and Far10p; has similarity to the N- and C-termini of N. crassa HAM-2
YER126C	164.39	-0.0792763	0.371326	0.992604	164.39	-0.277023	0.484067	0.999906	164.39	0.197747	0.610085	0.999827	NSA2	Protein constituent of 66S pre-ribosomal particles, contributes to processing of the 27S pre-rRNA
YBR046C	84.5767	0.424165	0.382614	0.959028	84.5767	0.607214	0.52077	0.999906	84.5767	-0.183049	0.646151	0.999827	ZTA1	NADPH-dependent quinone reductase, GFP-tagged protein localizes to the cytoplasm and nucleus; has similarity to E. coli quinone oxidoreductase and to human zeta-crystallin
YLR387C	95.408	-0.0389444	0.36582	0.992604	95.408	0.252917	0.477128	0.999906	95.408	-0.291862	0.601221	0.999827	REH1	Cytoplasmic 60S subunit biogenesis factor, associates with pre-60S particles; similar to Rei1p and shares partially redundant function in cytoplasmic 60S subunit maturation; contains dispersed C2H2 zinc finger domains
YGR061C	1400.62	-0.136404	0.269134	0.990954	1400.62	-0.0801559	0.366585	0.999906	1400.62	-0.0562484	0.454772	0.999827	ADE6	Formylglycinamidine-ribonucleotide (FGAM)-synthetase, catalyzes a step in the 'de novo' purine nucleotide biosynthetic pathway
YDR040C	470.503	-0.0172523	0.278122	0.992952	470.503	0.11472	0.374528	0.999906	470.503	-0.131973	0.4665	0.999827	ENA1	P-type ATPase sodium pump, involved in Na+ and Li+ efflux to allow salt tolerance
YBR288C	63.9334	-0.108233	0.405151	NA	63.9334	-0.117164	0.522518	0.999906	63.9334	0.0089315	0.661186	0.999827	APM3	Mu3-like subunit of the clathrin associated protein complex (AP-3); functions in transport of alkaline phosphatase to the vacuole via the alternate pathway
YDR141C	176.193	-0.0286566	0.324183	0.992604	176.193	0.160185	0.428692	0.999906	176.193	-0.188841	0.537464	0.999827	DOP1	Golgi-localized, leucine-zipper domain containing protein; involved in endosome to Golgi transport, organization of the ER, establishing cell polarity, and morphogenesis; detected in highly purified mitochondria in high-throughput studies
YKL089W	30.8787	0.26571	0.502545	NA	30.8787	-0.15549	0.585821	0.999906	30.8787	0.4212	0.771827	0.999827	MIF2	Kinetochore protein with homology to human CENP-C, required for structural integrity of the spindle during anaphase spindle elongation, interacts with histones H2A, H2B, and H4, phosphorylated by Ipl1p
YNL069C	2542.04	-0.0248045	0.247632	0.992604	2542.04	0.00945809	0.340309	0.999906	2542.04	-0.0342626	0.42087	0.999827	RPL16B	N-terminally acetylated protein component of the large (60S) ribosomal subunit, binds to 5.8 S rRNA; has similarity to Rpl16Ap, E. coli L13 and rat L13a ribosomal proteins; transcriptionally regulated by Rap1p
YNL154C	151.414	-0.40624	0.337383	0.959028	151.414	-0.110797	0.444664	0.999906	151.414	-0.295443	0.55817	0.999827	YCK2	Palmitoylated plasma membrane-bound casein kinase I isoform; shares redundant functions with Yck1p in morphogenesis, proper septin assembly, endocytic trafficking; provides an essential function overlapping with that of Yck1p
YER177W	1293.62	0.295906	0.26272	0.959028	1293.62	0.0989355	0.362526	0.999906	1293.62	0.196971	0.447712	0.999827	BMH1	14-3-3 protein, major isoform; controls proteome at post-transcriptional level, binds proteins and DNA, involved in regulation of many processes including exocytosis, vesicle transport, Ras/MAPK signaling, and rapamycin-sensitive signaling
YDR176W	59.7628	-0.170382	0.417682	NA	59.7628	-0.205806	0.501033	0.999906	59.7628	0.0354249	0.652296	0.999827	NGG1	Transcriptional regulator involved in glucose repression of Gal4p-regulated genes; component of transcriptional adaptor and histone acetyltransferase complexes, the ADA complex, the SAGA complex, and the SLIK complex
YLR019W	95.4789	-0.0474709	0.404849	0.992604	95.4789	0.055674	0.504618	0.999906	95.4789	-0.103145	0.646945	0.999827	PSR2	Functionally redundant Psr1p homolog, a plasma membrane phosphatase involved in the general stress response; required with Psr1p and Whi2p for full activation of STRE-mediated gene expression, possibly through dephosphorylation of Msn2p
YGR056W	55.5981	-0.635054	0.445497	NA	55.5981	-0.364104	0.544093	0.999906	55.5981	-0.270949	0.703209	0.999827	RSC1	Component of the RSC chromatin remodeling complex; required for expression of mid-late sporulation-specific genes; contains two essential bromodomains, a bromo-adjacent homology (BAH) domain, and an AT hook
YDR011W	569.499	0.192169	0.392802	0.992604	569.499	0.00243059	0.50565	0.999906	569.499	0.189738	0.640293	0.999827	SNQ2	Plasma membrane ATP-binding cassette (ABC) transporter, multidrug transporter involved in multidrug resistance and resistance to singlet oxygen species
YOL155C	198.043	0.0113748	0.474142	0.996693	198.043	-0.099227	0.581331	0.999906	198.043	0.110602	0.75017	0.999827	HPF1	Haze-protective mannoprotein that reduces the particle size of aggregated proteins in white wines
YKL151C	118.238	0.674656	0.454246	0.959028	118.238	0.487979	0.570842	0.999906	118.238	0.186678	0.729497	0.999827		Putative protein of unknown function; YKL151C promoter contains STREs (stress response elements) and expression is induced by heat shock or methyl methanesulfonate; green fluorescent protein (GFP)-fusion protein localizes to the cytoplasm
YCR052W	111.058	-0.102843	0.350282	0.992604	111.058	0.108039	0.456342	0.999906	111.058	-0.210882	0.575273	0.999827	RSC6	Component of the RSC chromatin remodeling complex; essential for mitotic growth; homolog of SWI/SNF subunit Swp73p
YAR050W	26.2025	-0.114826	0.622175	NA	26.2025	-0.33723	0.54169	0.999906	26.2025	0.222404	0.824942	0.999827	FLO1	Lectin-like protein involved in flocculation, cell wall protein that binds to mannose chains on the surface of other cells, confers floc-forming ability that is chymotrypsin sensitive and heat resistant; similar to Flo5p
YFR013W	72.8986	-0.259238	0.385932	0.967178	72.8986	-0.341283	0.492984	0.999906	72.8986	0.0820451	0.626081	0.999827	IOC3	Member of a complex (Isw1a) with Isw1p that has nucleosome-stimulated ATPase activity and represses transcription initiation by specific positioning of a promoter proximal dinucleosome; has homology to Esc8p, which is involved in silencing
YDR099W	571.688	0.294739	0.322433	0.959028	571.688	0.385906	0.434555	0.999906	571.688	-0.0911679	0.54111	0.999827	BMH2	14-3-3 protein, minor isoform; controls proteome at post-transcriptional level, binds proteins and DNA, involved in regulation of many processes including exocytosis, vesicle transport, Ras/MAPK signaling, and rapamycin-sensitive signaling
YIL034C	65.5374	0.325553	0.409364	NA	65.5374	0.419069	0.527585	0.999906	65.5374	-0.0935162	0.667701	0.999827	CAP2	Beta subunit of the capping protein (CP) heterodimer (Cap1p and Cap2p) which binds to the barbed ends of actin filaments preventing further polymerization; localized predominantly to cortical actin patches
YOL111C	74.3656	-0.0116056	0.38657	0.996693	74.3656	0.232965	0.506543	0.999906	74.3656	-0.244571	0.637181	0.999827	MDY2	Protein with a role in insertion of tail-anchored proteins into the ER membrane; forms a complex with Get4p; required for efficient mating; involved in shmoo formation and nuclear migration in the pre-zygote; associates with ribosomes
YCR016W	71.481	-0.243221	0.399946	0.979138	71.481	-0.0206551	0.516291	0.999906	71.481	-0.222565	0.653077	0.999827		Putative protein of unknown function; green fluorescent protein (GFP)-fusion protein localizes to the nucleolus and nucleus; predicted to be involved in ribosome biogenesis
YDR213W	37.9623	0.05693	0.459337	NA	37.9623	-0.00630497	0.555699	0.999906	37.9623	0.063235	0.720949	0.999827	UPC2	Sterol regulatory element binding protein, induces transcription of sterol biosynthetic genes and of DAN/TIR gene products; Ecm22p homolog; relocates from intracellular membranes to perinuclear foci on sterol depletion
YHL035C	101.309	-0.0393071	0.410727	0.992604	101.309	-0.367766	0.474582	0.999906	101.309	0.328459	0.627637	0.999827	VMR1	Vacuolar membrane protein involved in multiple drug resistance and metal sensitivity; ATP-binding cassette (ABC) family member involved in drug transport; potential Cdc28p substrate; induced under respiratory conditions
YML074C	1107.6	-0.424088	0.311442	0.959028	1107.6	0.204059	0.41951	0.999906	1107.6	-0.628147	0.52248	0.999827	FPR3	Nucleolar peptidyl-prolyl cis-trans isomerase (PPIase); FK506 binding protein; phosphorylated by casein kinase II (Cka1p-Cka2p-Ckb1p-Ckb2p) and dephosphorylated by Ptp1p
YIL070C	66.7645	-0.531141	0.444515	0.959028	66.7645	-0.604135	0.556007	0.999906	66.7645	0.072994	0.711853	0.999827	MAM33	Acidic protein of the mitochondrial matrix involved in oxidative phosphorylation; related to the human complement receptor gC1q-R
YNL110C	73.873	-0.621204	0.379815	0.959028	73.873	0.0302223	0.50191	0.999906	73.873	-0.651426	0.629425	0.999827	NOP15	Constituent of 66S pre-ribosomal particles, involved in 60S ribosomal subunit biogenesis; localizes to both nucleolus and cytoplasm
YLR459W	76.0586	-0.0235601	0.427394	0.992952	76.0586	0.0221889	0.545167	0.999906	76.0586	-0.0457489	0.692723	0.999827	GAB1	GPI transamidase subunit, involved in attachment of glycosylphosphatidylinositol (GPI) anchors to proteins; may have a role in recognition of the attachment signal or of the lipid portion of GPI
YOR092W	44.433	-0.0940812	0.489765	NA	44.433	-0.60129	0.588814	0.999906	44.433	0.507209	0.765895	0.999827	ECM3	Non-essential protein of unknown function; involved in signal transduction and the genotoxic response; induced rapidly in response to treatment with 8-methoxypsoralen and UVA irradiation
YNL231C	122.067	0.618678	0.370288	0.959028	122.067	0.47401	0.480227	0.999906	122.067	0.144668	0.606388	0.999827	PDR16	Phosphatidylinositol transfer protein (PITP) controlled by the multiple drug resistance regulator Pdr1p, localizes to lipid particles and microsomes, controls levels of various lipids, may regulate lipid synthesis, homologous to Pdr17p
YDR055W	73.6826	-0.190616	0.470978	0.992604	73.6826	-0.119408	0.582859	0.999906	73.6826	-0.0712081	0.749361	0.999827	PST1	Cell wall protein that contains a putative GPI-attachment site; secreted by regenerating protoplasts; up-regulated by activation of the cell integrity pathway, as mediated by Rlm1p; upregulated by cell wall damage via disruption of FKS1
YGR254W	20434.6	0.373664	0.26461	0.959028	20434.6	0.399521	0.359164	0.999906	20434.6	-0.0258568	0.446113	0.999827	ENO1	Enolase I, a phosphopyruvate hydratase that catalyzes the conversion of 2-phosphoglycerate to phosphoenolpyruvate during glycolysis and the reverse reaction during gluconeogenesis; expression is repressed in response to glucose
YLL031C	153.595	-0.0800256	0.380276	0.992604	153.595	-0.188701	0.485052	0.999906	153.595	0.108675	0.616347	0.999827	GPI13	ER membrane localized phosphoryltransferase that adds phosphoethanolamine onto the third mannose residue of the glycosylphosphatidylinositol (GPI) anchor precursor; similar to human PIG-O protein
YKR096W	65.8899	-0.325461	0.417331	NA	65.8899	-0.413036	0.508474	0.999906	65.8899	0.0875748	0.657809	0.999827		Protein of unknown function that may interact with ribosomes, based on co-purification experiments; green fluorescent protein (GFP)-fusion protein localizes to the nucleus and cytoplasm; predicted to contain a PINc domain
YMR125W	164.668	0.104917	0.343697	0.992604	164.668	0.134234	0.45052	0.999906	164.668	-0.0293167	0.566648	0.999827	STO1	Large subunit of the nuclear mRNA cap-binding protein complex, interacts with Npl3p to carry nuclear poly(A)+ mRNA to cytoplasm; also involved in nuclear mRNA degradation and telomere maintenance; orthologous to mammalian CBP80
YPR110C	272.162	-0.139089	0.336933	0.992604	272.162	0.0909731	0.454001	0.999906	272.162	-0.230062	0.565367	0.999827	RPC40	RNA polymerase subunit AC40, common to RNA polymerase I and III
YNL330C	87.1497	0.330275	0.362448	0.959028	87.1497	0.149245	0.471939	0.999906	87.1497	0.18103	0.595036	0.999827	RPD3	Histone deacetylase; regulates transcription, silencing, and other processes by influencing chromatin remodeling; forms at least two different complexes which have distinct functions and members
YGR157W	382.657	-0.216781	0.329266	0.967178	382.657	0.0818461	0.438297	0.999906	382.657	-0.298627	0.548197	0.999827	CHO2	Phosphatidylethanolamine methyltransferase (PEMT), catalyzes the first step in the conversion of phosphatidylethanolamine to phosphatidylcholine during the methylation pathway of phosphatidylcholine biosynthesis
YLL013C	117.882	0.306201	0.38828	0.959028	117.882	0.0232557	0.486589	0.999906	117.882	0.282945	0.622514	0.999827	PUF3	Protein of the mitochondrial outer surface, links the Arp2/3 complex with the mitochore during anterograde mitochondrial movement; also binds to and promotes degradation of mRNAs for select nuclear-encoded mitochondrial proteins
YNL055C	614.091	0.627517	0.294122	0.829774	614.091	0.414128	0.403534	0.999906	614.091	0.213389	0.499344	0.999827	POR1	Mitochondrial porin (voltage-dependent anion channel), outer membrane protein required for the maintenance of mitochondrial osmotic stability and mitochondrial membrane permeability; phosphorylated
YOL098C	241.597	0.274799	0.299462	0.959028	241.597	0.156776	0.405467	0.999906	241.597	0.118024	0.50406	0.999827		Putative metalloprotease
YKL014C	260.054	-0.352382	0.303929	0.959028	260.054	-0.483842	0.401762	0.999906	260.054	0.13146	0.503772	0.999827	URB1	Nucleolar protein required for the normal accumulation of 25S and 5.8S rRNAs, associated with the 27SA2 pre-ribosomal particle; proposed to be involved in the biogenesis of the 60S ribosomal subunit
YDR077W	2095.47	0.609589	0.302014	0.833522	2095.47	0.314705	0.403589	0.999906	2095.47	0.294884	0.50408	0.999827	SED1	Major stress-induced structural GPI-cell wall glycoprotein in stationary-phase cells, associates with translating ribosomes, possible role in mitochondrial genome maintenance; ORF contains two distinct variable minisatellites
YPR033C	505.413	0.105054	0.269471	0.992604	505.413	-0.119685	0.372149	0.999906	505.413	0.224739	0.459466	0.999827	HTS1	Cytoplasmic and mitochondrial histidine tRNA synthetase; encoded by a single nuclear gene that specifies two messages; efficient mitochondrial localization requires both a presequence and an amino-terminal sequence
YBR237W	41.8313	0.148813	0.472407	NA	41.8313	0.0184644	0.569448	0.999906	41.8313	0.130349	0.739868	0.999827	PRP5	RNA helicase in the DEAD-box family, necessary for prespliceosome formation, bridges U1 and U2 snRNPs and enables stable U2 snRNP association with intron RNA
YDR312W	76.2473	-0.404459	0.372099	0.959028	76.2473	-0.448351	0.492827	0.999906	76.2473	0.0438922	0.617525	0.999827	SSF2	Protein required for ribosomal large subunit maturation, functionally redundant with Ssf1p; member of the Brix family
YMR238W	149.927	-0.104608	0.326083	0.992604	149.927	0.0649525	0.448141	0.999906	149.927	-0.16956	0.554217	0.999827	DFG5	Putative mannosidase, essential glycosylphosphatidylinositol (GPI)-anchored membrane protein required for cell wall biogenesis in bud formation, involved in filamentous growth, homologous to Dcw1p
YER032W	53.4148	-0.533064	0.437795	NA	53.4148	-0.460912	0.53101	0.999906	53.4148	-0.0721519	0.688211	0.999827	FIR1	Protein involved in 3' mRNA processing, interacts with Ref2p; potential Cdc28p substrate
YCR034W	187.825	0.267478	0.32373	0.959028	187.825	-0.331198	0.435417	0.999906	187.825	0.598676	0.542577	0.999827	FEN1	Fatty acid elongase, involved in sphingolipid biosynthesis; acts on fatty acids of up to 24 carbons in length; mutations have regulatory effects on 1,3-beta-glucan synthase, vacuolar ATPase, and the secretory pathway
YDR110W	29.0177	-0.622941	0.503545	NA	29.0177	-0.0574663	0.589185	0.999906	29.0177	-0.565475	0.775052	0.999827	FOB1	Nucleolar protein that binds the rDNA replication fork barrier (RFB) site; required for replication fork blocking, recombinational hotspot activity, condensin recruitment to RFB and rDNA repeat segregation; related to retroviral integrases
YDR356W	65.6383	-1.06251	0.410889	NA	65.6383	0.403284	0.519607	0.999906	65.6383	-1.4658	0.662462	0.999827	SPC110	Inner plaque spindle pole body (SPB) component, ortholog of human kendrin; involved in connecting nuclear microtubules to SPB; interacts with Tub4p-complex and calmodulin; phosphorylated by Mps1p in cell cycle-dependent manner
YPL093W	551.505	-0.290602	0.335765	0.959028	551.505	0.00607129	0.444404	0.999906	551.505	-0.296673	0.556986	0.999827	NOG1	Putative GTPase that associates with free 60S ribosomal subunits in the nucleolus and is required for 60S ribosomal subunit biogenesis; constituent of 66S pre-ribosomal particles; member of the ODN family of nucleolar G-proteins
YGR113W	38.1416	-0.495444	0.464078	NA	38.1416	-0.529146	0.56239	0.999906	38.1416	0.0337026	0.729143	0.999827	DAM1	Essential subunit of the Dam1 complex (aka DASH complex), couples kinetochores to the force produced by MT depolymerization thereby aiding in chromosome segregation; Ipl1p target for regulating kinetochore-MT attachments
YNL176C	43.9551	-0.566508	0.491359	NA	43.9551	-0.0667195	0.577805	0.999906	43.9551	-0.499789	0.758483	0.999827		Cell cycle-regulated gene of unknown function, promoter bound by Fkh2p
YNL099C	53.5011	0.0338732	0.419	NA	53.5011	-0.500289	0.515904	0.999906	53.5011	0.534162	0.664629	0.999827	OCA1	Putative protein tyrosine phosphatase, required for cell cycle arrest in response to oxidative damage of DNA
YMR119W	36.5103	-0.251541	0.500937	NA	36.5103	-0.133248	0.589596	0.999906	36.5103	-0.118293	0.773662	0.999827	ASI1	Putative integral membrane E3 ubiquitin ligase; acts with Asi2p and Asi3p to ensure the fidelity of SPS-sensor signalling by maintaining the dormant repressed state of gene expression in the absence of inducing signals
YNL257C	58.0708	-0.425655	0.439614	NA	58.0708	0.0863114	0.524597	0.999906	58.0708	-0.511966	0.684442	0.999827	SIP3	Protein that activates transcription through interaction with DNA-bound Snf1p, C-terminal region has a putative leucine zipper motif; potential Cdc28p substrate
YDR033W	688.76	-0.835654	0.607291	0.959028	688.76	-0.0302677	0.646134	0.999906	688.76	-0.805387	0.886731	0.999827	MRH1	Protein that localizes primarily to the plasma membrane, also found at the nuclear envelope; the authentic, non-tagged protein is detected in mitochondria in a phosphorylated state; has similarity to Hsp30p and Yro2p
YLR190W	114.729	-0.616615	0.3655	0.959028	114.729	-0.544424	0.46644	0.999906	114.729	-0.072191	0.592584	0.999827	MMR1	Phosphorylated protein of the mitochondrial outer membrane, localizes only to mitochondria of the bud; interacts with Myo2p to mediate mitochondrial distribution to buds; mRNA is targeted to the bud via the transport system involving She2p
YBR071W	29.7589	0.175281	0.519576	NA	29.7589	0.442675	0.607457	0.999906	29.7589	-0.267394	0.799293	0.999827		Putative protein of unknown function; (GFP)-fusion and epitope-tagged proteins localize to the cytoplasm; mRNA expression may be regulated by the cell cycle and/or cell wall stress
YLR061W	1240.56	-0.0910362	0.253808	0.992604	1240.56	-0.181824	0.345892	0.999906	1240.56	0.0907881	0.429022	0.999827	RPL22A	Protein component of the large (60S) ribosomal subunit, has similarity to Rpl22Bp and to rat L22 ribosomal protein
YMR143W	958.86	-0.0221341	0.250933	0.992604	958.86	-0.00192637	0.349766	0.999906	958.86	-0.0202078	0.430469	0.999827	RPS16A	Protein component of the small (40S) ribosomal subunit; identical to Rps16Bp and has similarity to E. coli S9 and rat S16 ribosomal proteins
YBR191W	1324.88	0.0770205	0.296005	0.992604	1324.88	0.069232	0.399226	0.999906	1324.88	0.00778854	0.496991	0.999827	RPL21A	Protein component of the large (60S) ribosomal subunit, nearly identical to Rpl21Bp and has similarity to rat L21 ribosomal protein
YPR022C	51.9717	-0.0313811	0.474983	NA	51.9717	0.0280642	0.562337	0.999906	51.9717	-0.0594453	0.736082	0.999827		Putative protein of unknown function; green fluorescent protein (GFP)-fusion protein localizes to both the cytoplasm and the nucleus and is induced in response to the DNA-damaging agent MMS
YJL141C	81.8981	0.00641324	0.434341	0.997365	81.8981	-0.0819348	0.522178	0.999906	81.8981	0.088348	0.679199	0.999827	YAK1	Serine-threonine protein kinase that is part of a glucose-sensing system involved in growth control in response to glucose availability; translocates from the cytoplasm to the nucleus and phosphorylates Pop2p in response to a glucose signal
YML120C	94.462	-0.407375	0.430895	0.959028	94.462	0.288502	0.547596	0.999906	94.462	-0.695877	0.696799	0.999827	NDI1	NADH:ubiquinone oxidoreductase, transfers electrons from NADH to ubiquinone in the respiratory chain but does not pump protons, in contrast to the higher eukaryotic multisubunit respiratory complex I; phosphorylated; homolog of human AMID
YNL096C	950.123	-0.331205	0.398549	0.959028	950.123	0.0124786	0.512517	0.999906	950.123	-0.343684	0.649242	0.999827	RPS7B	Protein component of the small (40S) ribosomal subunit, nearly identical to Rps7Ap; interacts with Kti11p; deletion causes hypersensitivity to zymocin; has similarity to rat S7 and Xenopus S8 ribosomal proteins
YOL122C	70.3218	0.308508	0.438847	0.967178	70.3218	0.525912	0.54767	0.999906	70.3218	-0.217404	0.701759	0.999827	SMF1	Divalent metal ion transporter with a broad specificity for di-valent and tri-valent metals; post-translationally regulated by levels of metal ions; member of the Nramp family of metal transport proteins
YNR028W	63.7546	0.123923	0.417486	NA	63.7546	0.558155	0.541521	0.999906	63.7546	-0.434232	0.683728	0.999827	CPR8	Peptidyl-prolyl cis-trans isomerase (cyclophilin), catalyzes the cis-trans isomerization of peptide bonds N-terminal to proline residues; similarity to Cpr4p suggests a potential role in the secretory pathway
YPL208W	60.7271	0.102761	0.421421	NA	60.7271	0.486587	0.538322	0.999906	60.7271	-0.383826	0.683615	0.999827	RKM1	SET-domain lysine-N-methyltransferase, catalyzes the formation of dimethyllysine residues on the large ribsomal subunit protein L23a (RPL23A and RPL23B)
YMR108W	670.788	0.399749	0.288129	0.959028	670.788	0.224406	0.390988	0.999906	670.788	0.175343	0.485685	0.999827	ILV2	Acetolactate synthase, catalyses the first common step in isoleucine and valine biosynthesis and is the target of several classes of inhibitors, localizes to the mitochondria; expression of the gene is under general amino acid control
YER001W	152.118	-0.00196703	0.377854	1	152.118	0.0856515	0.48963	0.999906	152.118	-0.0876185	0.618473	0.999827	MNN1	Alpha-1,3-mannosyltransferase, integral membrane glycoprotein of the Golgi complex, required for addition of alpha1,3-mannose linkages to N-linked and O-linked oligosaccharides, one of five S. cerevisiae proteins of the MNN1 family
YER100W	84.7655	-0.493131	0.400904	0.959028	84.7655	-0.0412152	0.522109	0.999906	84.7655	-0.451916	0.658272	0.999827	UBC6	Ubiquitin-conjugating enzyme involved in ER-associated protein degradation; located at the cytosolic side of the ER membrane; tail region contains a transmembrane segment at the C-terminus; substrate of the ubiquitin-proteasome pathway
YDR321W	234.061	0.0153733	0.314343	0.993048	234.061	0.138725	0.421414	0.999906	234.061	-0.123351	0.525737	0.999827	ASP1	Cytosolic L-asparaginase, involved in asparagine catabolism
YDR527W	65.5068	-1.08803	0.428489	NA	65.5068	-0.376868	0.528668	0.999906	65.5068	-0.71116	0.680506	0.999827	RBA50	Protein involved in transcription; interacts with RNA polymerase II subunits Rpb2p, Rpb3, and Rpb11p; has similarity to human RPAP1
YBL084C	34.4881	-0.0105472	0.517705	NA	34.4881	0.123293	0.596678	0.999906	34.4881	-0.13384	0.789934	0.999827	CDC27	Subunit of the Anaphase-Promoting Complex/Cyclosome (APC/C), which is a ubiquitin-protein ligase required for degradation of anaphase inhibitors, including mitotic cyclins, during the metaphase/anaphase transition
YDL028C	44.2111	-0.960196	0.493536	NA	44.2111	-0.126932	0.574461	0.999906	44.2111	-0.833265	0.75736	0.999827	MPS1	Dual-specificity kinase required for spindle pole body (SPB) duplication and spindle checkpoint function; substrates include SPB proteins Spc42p, Spc110p, and Spc98p, mitotic exit network protein Mob1p, and checkpoint protein Mad1p
YLR383W	105.817	-0.116432	0.42774	0.992604	105.817	0.131156	0.533078	0.999906	105.817	-0.247588	0.68347	0.999827	SMC6	Protein involved in structural maintenance of chromosomes; essential subunit of Mms21-Smc5-Smc6 complex; required for growth, DNA repair, interchromosomal and sister chromatid recombination; homologous to S. pombe rad18
YDR044W	194.716	0.317981	0.312378	0.959028	194.716	-0.312528	0.427393	0.999906	194.716	0.630509	0.529382	0.999827	HEM13	Coproporphyrinogen III oxidase, an oxygen requiring enzyme that catalyzes the sixth step in the heme biosynthetic pathway; transcription is repressed by oxygen and heme (via Rox1p and Hap1p)
YNL022C	50.8306	-0.201085	0.422398	NA	50.8306	0.0781206	0.537193	0.999906	50.8306	-0.279206	0.683363	0.999827		Putative cytosine 5-methyltransferase, contains seven beta-strand methyltransferase motif similar to NOP2/YNL061W; green fluorescent protein (GFP)-fusion protein localizes to the nucleus; predicted to be involved in ribosome biogenesis
YOL089C	37.9912	-0.221568	0.50186	NA	37.9912	0.0993136	0.588536	0.999906	37.9912	-0.320881	0.773446	0.999827	HAL9	Putative transcription factor containing a zinc finger; overexpression increases salt tolerance through increased expression of the ENA1 (Na+/Li+ extrusion pump) gene while gene disruption decreases both salt tolerance and ENA1 expression
YKL005C	43.9886	-0.691133	0.445139	NA	43.9886	-0.0517788	0.540115	0.999906	43.9886	-0.639354	0.699916	0.999827	BYE1	Negative regulator of transcription elongation, contains a TFIIS-like domain and a PHD finger, multicopy suppressor of temperature-sensitive ess1 mutations, probably binds RNA polymerase II large subunit
YKL104C	679.664	0.211052	0.276423	0.962661	679.664	0.232801	0.377728	0.999906	679.664	-0.0217495	0.468068	0.999827	GFA1	Glutamine-fructose-6-phosphate amidotransferase, catalyzes the formation of glucosamine-6-P and glutamate from fructose-6-P and glutamine in the first step of chitin biosynthesis
YDR145W	93.4387	-0.0466205	0.380677	0.992604	93.4387	0.0307754	0.480019	0.999906	93.4387	-0.0773959	0.61264	0.999827	TAF12	Subunit (61/68 kDa) of TFIID and SAGA complexes, involved in RNA polymerase II transcription initiation and in chromatin modification, similar to histone H2A
YCR061W	170.538	0.427093	0.380172	0.959028	170.538	0.810936	0.508729	0.999906	170.538	-0.383843	0.635061	0.999827		Protein of unknown function; green fluorescent protein (GFP)-fusion protein localizes to the cytoplasm in a punctate pattern; induced by treatment with 8-methoxypsoralen and UVA irradiation
YHR048W	140.576	1.54487	0.640418	0.735749	140.576	1.11523	0.578339	0.999906	140.576	0.429632	0.862908	0.999827	YHK8	Presumed antiporter of the DHA1 family of multidrug resistance transporters; contains 12 predicted transmembrane spans; expression of gene is up-regulated in cells exhibiting reduced susceptibility to azoles
YPR088C	217.784	0.194274	0.29792	0.970513	217.784	-0.0925734	0.407316	0.999906	217.784	0.286847	0.504639	0.999827	SRP54	Signal recognition particle (SRP) subunit (homolog of mammalian SRP54); contains the signal sequence-binding activity of SRP, interacts with the SRP RNA, and mediates binding of SRP to signal receptor; contains GTPase domain
YIL043C	448.215	0.154086	0.275397	0.982129	448.215	0.670881	0.385031	0.999906	448.215	-0.516794	0.473381	0.999827	CBR1	Microsomal cytochrome b reductase, not essential for viability; also detected in mitochondria; mutation in conserved NADH binding domain of the human ortholog results in type I methemoglobinemia
YGL009C	564.281	0.381289	0.310019	0.959028	564.281	0.319016	0.419548	0.999906	564.281	0.0622729	0.521661	0.999827	LEU1	Isopropylmalate isomerase, catalyzes the second step in the leucine biosynthesis pathway
YJL127C	29.853	0.501546	0.50254	NA	29.853	0.0329159	0.584112	0.999906	29.853	0.46863	0.770476	0.999827	SPT10	Putative histone acetylase with a role in transcriptional silencing, sequence-specific activator of histone genes, binds specifically and cooperatively to pairs of UAS elements in core histone promoters, functions at or near the TATA box
YHR012W	59.7418	0.0904292	0.417908	NA	59.7418	-0.274819	0.534204	0.999906	59.7418	0.365248	0.678248	0.999827	VPS29	Endosomal protein that is a subunit of the membrane-associated retromer complex essential for endosome-to-Golgi retrograde transport; forms a subcomplex with Vps35p and Vps26p that selects cargo proteins for endosome-to-Golgi retrieval
YNL264C	61.4329	0.306481	0.424518	NA	61.4329	0.342312	0.546155	0.999906	61.4329	-0.0358316	0.69169	0.999827	PDR17	Phosphatidylinositol transfer protein (PITP), downregulates Plb1p-mediated turnover of phosphatidylcholine, found in the cytosol and microsomes, homologous to Pdr16p, deletion affects phospholipid composition
YLR109W	3120.19	1.10699	0.318304	0.0984263	3120.19	0.745727	0.424012	0.999906	3120.19	0.361261	0.530192	0.999827	AHP1	Thiol-specific peroxiredoxin, reduces hydroperoxides to protect against oxidative damage; function in vivo requires covalent conjugation to Urm1p
YDR347W	38.1955	0.0930093	0.458827	NA	38.1955	-0.111397	0.558974	0.999906	38.1955	0.204407	0.723153	0.999827	MRP1	Mitochondrial ribosomal protein of the small subunit; MRP1 exhibits genetic interactions with PET122, encoding a COX3-specific translational activator, and with PET123, encoding a small subunit mitochondrial ribosomal protein
YNL167C	34.4482	0.679104	0.52344	NA	34.4482	-0.484498	0.594472	0.999906	34.4482	1.1636	0.792115	0.999827	SKO1	Basic leucine zipper (bZIP) transcription factor of the ATF/CREB family, forms a complex with Tup1p and Ssn6p to both activate and repress transcription; cytosolic and nuclear protein involved in osmotic and oxidative stress responses
YER166W	228.037	0.0703554	0.304567	0.992604	228.037	0.0651204	0.405118	0.999906	228.037	0.00523498	0.506832	0.999827	DNF1	Aminophospholipid translocase (flippase) that localizes primarily to the plasma membrane; contributes to endocytosis, protein transport and cell polarity; type 4 P-type ATPase
YJR094W-A	434.205	0.0819536	0.320367	0.992604	434.205	-0.0482737	0.422644	0.999906	434.205	0.130227	0.530342	0.999827	RPL43B	Protein component of the large (60S) ribosomal subunit, identical to Rpl43Ap and has similarity to rat L37a ribosomal protein
YHR084W	50.7056	0.218078	0.450575	NA	50.7056	-0.200607	0.545953	0.999906	50.7056	0.418684	0.707867	0.999827	STE12	Transcription factor that is activated by a MAP kinase signaling cascade, activates genes involved in mating or pseudohyphal/invasive growth pathways; cooperates with Tec1p transcription factor to regulate genes specific for invasive growth
YFR002W	143.856	-0.00664723	0.329562	0.996693	143.856	-0.0317416	0.433479	0.999906	143.856	0.0250943	0.544529	0.999827	NIC96	Component of the nuclear pore complex, required for nuclear pore formation; forms a subcomplex with Nsp1p, Nup57p, and Nup49p
YCL049C	103.343	-0.435741	0.376317	0.959028	103.343	0.0900576	0.503825	0.999906	103.343	-0.525798	0.628851	0.999827		Protein of unknown function; localizes to membrane fraction; YCL049C is not an essential gene
YDR189W	123.7	0.190578	0.351817	0.986131	123.7	-0.13201	0.467273	0.999906	123.7	0.322588	0.584907	0.999827	SLY1	Hydrophilic protein involved in vesicle trafficking between the ER and Golgi; SM (Sec1/Munc-18) family protein that binds the tSNARE Sed5p and stimulates its assembly into a trans-SNARE membrane-protein complex
YPL028W	745.519	0.225806	0.269331	0.959028	745.519	0.117283	0.372938	0.999906	745.519	0.108523	0.460023	0.999827	ERG10	Acetyl-CoA C-acetyltransferase (acetoacetyl-CoA thiolase), cytosolic enzyme that transfers an acetyl group from one acetyl-CoA molecule to another, forming acetoacetyl-CoA; involved in the first step in mevalonate biosynthesis
YHL039W	92.6043	0.12551	0.422774	0.992604	92.6043	-0.296872	0.532586	0.999906	92.6043	0.422382	0.67999	0.999827	EFM1	Probable lysine methyltransferase involved in the monomethylation of eEF1A (Tef1p/Tef2p); SET-domain family member; predicted involvement in ribosome biogenesis; green fluorescent protein (GFP)-fusion protein localizes to the cytoplasm
YER094C	276.646	0.291515	0.311418	0.959028	276.646	0.162684	0.429258	0.999906	276.646	0.128831	0.53032	0.999827	PUP3	Beta 3 subunit of the 20S proteasome involved in ubiquitin-dependent catabolism; human homolog is subunit C10
YDR524C-B	1226.61	0.262297	0.289241	0.959028	1226.61	0.104668	0.393878	0.999906	1226.61	0.157628	0.488671	0.999827		Putative protein of unknown function
YGL115W	110.968	-0.0451488	0.35187	0.992604	110.968	-0.417065	0.45902	0.999906	110.968	0.371916	0.578372	0.999827	SNF4	Activating gamma subunit of the AMP-activated Snf1p kinase complex (contains Snf1p and a Sip1p/Sip2p/Gal83p family member); activates glucose-repressed genes, represses glucose-induced genes; role in sporulation, and peroxisome biogenesis
YKL191W	119.778	-0.209273	0.36016	0.982129	119.778	0.0711196	0.467161	0.999906	119.778	-0.280392	0.589874	0.999827	DPH2	Protein required, along with Dph1p, Kti11p, Jjj3p, and Dph5p, for synthesis of diphthamide, which is a modified histidine residue of translation elongation factor 2 (Eft1p or Eft2p); may act in a complex with Dph1p and Kti11p
YLR051C	68.567	-0.414224	0.460761	0.959028	68.567	-0.349868	0.565102	0.999906	68.567	-0.0643556	0.729138	0.999827	FCF2	Essential nucleolar protein involved in the early steps of 35S rRNA processing; interacts with Faf1p; member of a transcriptionally co-regulated set of genes called the RRB regulon
YOR171C	97.9414	0.241263	0.362865	0.967178	97.9414	-0.199087	0.478431	0.999906	97.9414	0.44035	0.60047	0.999827	LCB4	Sphingoid long-chain base kinase, responsible for synthesis of long-chain base phosphates, which function as signaling molecules, regulates synthesis of ceramide from exogenous long-chain bases, localizes to the Golgi and late endosomes
YCR092C	42.3519	-0.19879	0.463268	NA	42.3519	-0.165193	0.546041	0.999906	42.3519	-0.0335972	0.716082	0.999827	MSH3	Mismatch repair protein, forms dimers with Msh2p that mediate repair of insertion or deletion mutations and removal of nonhomologous DNA ends, contains a PCNA (Pol30p) binding motif required for genome stability
YGR258C	55.5734	-0.0655301	0.431269	NA	55.5734	0.125567	0.53527	0.999906	55.5734	-0.191097	0.687376	0.999827	RAD2	Single-stranded DNA endonuclease, cleaves single-stranded DNA during nucleotide excision repair to excise damaged DNA; subunit of Nucleotide Excision Repair Factor 3 (NEF3); homolog of human XPG protein
YFL037W	1348.96	0.0893686	0.26266	0.992604	1348.96	0.102363	0.36088	0.999906	1348.96	-0.0129942	0.446346	0.999827	TUB2	Beta-tubulin; associates with alpha-tubulin (Tub1p and Tub3p) to form tubulin dimer, which polymerizes to form microtubules
YDL237W	103.523	0.292934	0.369486	0.959028	103.523	0.554259	0.493104	0.999906	103.523	-0.261324	0.616137	0.999827	AIM6	Putative protein of unknown function, required for respiratory growth; YDL237W is not an essential gene
YHR132C	211.484	0.231358	0.324275	0.967178	211.484	-0.110406	0.437957	0.999906	211.484	0.341764	0.544939	0.999827	ECM14	Putative metalloprotease with similarity to the zinc carboxypeptidase family, required for normal cell wall assembly
YKL006W	4100	-0.0833051	0.249042	0.992604	4100	-0.198221	0.341109	0.999906	4100	0.114916	0.422348	0.999827	RPL14A	N-terminally acetylated protein component of the large (60S) ribosomal subunit, nearly identical to Rpl14Bp and has similarity to rat L14 ribosomal protein; rpl14a csh5 double null mutant exhibits synthetic slow growth
YLR136C	46.279	-0.678534	0.488848	NA	46.279	-0.720076	0.586253	0.999906	46.279	0.0415424	0.763319	0.999827	TIS11	mRNA-binding protein expressed during iron starvation; binds to a sequence element in the 3'-untranslated regions of specific mRNAs to mediate their degradation; involved in iron homeostasis
YGL036W	67.6198	0.397746	0.413131	0.959028	67.6198	0.0578004	0.503067	0.999906	67.6198	0.339946	0.650937	0.999827		Putative protein of unknown function; green fluorescent protein (GFP)-fusion protein localizes to the cytoplasm; YGL036W is not an essential gene
YGL234W	1115.74	0.0139873	0.276671	0.993048	1115.74	-0.148453	0.375893	0.999906	1115.74	0.16244	0.466736	0.999827	ADE5,7	Bifunctional enzyme of the 'de novo' purine nucleotide biosynthetic pathway, contains aminoimidazole ribotide synthetase and glycinamide ribotide synthetase activities
YGL151W	87.8733	-0.0311069	0.367836	0.992604	87.8733	-0.0958485	0.470562	0.999906	87.8733	0.0647416	0.597266	0.999827	NUT1	Component of the RNA polymerase II mediator complex, which is required for transcriptional activation and also has a role in basal transcription
YOR052C	79.4207	-0.0284627	0.400127	0.992914	79.4207	-0.452078	0.526433	0.999906	79.4207	0.423615	0.661242	0.999827		Nuclear protein of unknown function; expression induced by nitrogen limitation in a GLN3, GAT1-independent manner and by weak acid
YBR093C	97.1016	-0.1995	0.395413	0.991583	97.1016	-0.422344	0.52205	0.999906	97.1016	0.222845	0.654898	0.999827	PHO5	Repressible acid phosphatase (1 of 3) that also mediates extracellular nucleotide-derived phosphate hydrolysis; secretory pathway derived cell surface glycoprotein; induced by phosphate starvation and coordinately regulated by PHO4 and PHO2
YLR370C	124.036	0.672249	0.402368	0.959028	124.036	0.457525	0.517895	0.999906	124.036	0.214724	0.655815	0.999827	ARC18	Subunit of the ARP2/3 complex, which is required for the motility and integrity of cortical actin patches
YLR172C	350.442	0.0523635	0.324182	0.992604	350.442	0.134731	0.435006	0.999906	350.442	-0.082368	0.542516	0.999827	DPH5	Methyltransferase required for synthesis of diphthamide, which is a modified histidine residue of translation elongation factor 2 (Eft1p or Eft2p); not essential for viability; GFP-Dph5p fusion protein localizes to the cytoplasm
YDL116W	85.7832	-0.543206	0.370354	0.959028	85.7832	-0.71195	0.478921	0.999906	85.7832	0.168744	0.605412	0.999827	NUP84	Subunit of the nuclear pore complex (NPC), forms a subcomplex with Nup85p, Nup120p, Nup145p-C, Sec13p, and Seh1p that plays a role in nuclear mRNA export and NPC biogenesis
YMR216C	135.269	0.134678	0.35928	0.992604	135.269	-0.0968622	0.461061	0.999906	135.269	0.23154	0.584514	0.999827	SKY1	SR protein kinase (SRPK) involved in regulating proteins involved in mRNA metabolism and cation homeostasis; similar to human SRPK1
YPL283C	39.9734	-0.387336	0.509966	NA	39.9734	1.25113	0.575272	0.999906	39.9734	-1.63847	0.768747	0.999827	YRF1-7	Helicase encoded by the Y' element of subtelomeric regions, highly expressed in the mutants lacking the telomerase component TLC1; potentially phosphorylated by Cdc28p
YJL019W	52.1109	-0.0640439	0.448186	NA	52.1109	-0.0185215	0.549996	0.999906	52.1109	-0.0455224	0.709476	0.999827	MPS3	Nuclear envelope protein required for SPB duplication and nuclear fusion; localizes to the SPB half bridge and at telomeres during meiosis; required with Ndj1p and Csm4p for meiotic bouquet formation and telomere-led rapid prophase movement
YDR194C	124.692	-0.206095	0.357544	0.982129	124.692	-0.0315244	0.459319	0.999906	124.692	-0.174571	0.582073	0.999827	MSS116	DEAD-box protein required for efficient splicing of mitochondrial Group I and II introns; non-polar RNA helicase that also facilities strand annealing
YLR433C	120.383	0.256326	0.403482	0.97228	120.383	-0.135146	0.514793	0.999906	120.383	0.391472	0.65407	0.999827	CNA1	Calcineurin A; one isoform (the other is CMP2) of the catalytic subunit of calcineurin, a Ca++/calmodulin-regulated protein phosphatase which regulates Crz1p (a stress-response transcription factor), the other calcineurin subunit is CNB1
YGL216W	86.0818	0.170233	0.391038	0.992604	86.0818	0.183023	0.490668	0.999906	86.0818	-0.0127906	0.627416	0.999827	KIP3	Kinesin-related motor protein involved in mitotic spindle positioning
YML096W	35.1166	0.252165	0.513283	NA	35.1166	0.18347	0.599501	0.999906	35.1166	0.0686945	0.789181	0.999827		Putative protein of unknown function with similarity to asparagine synthetases; green fluorescent protein (GFP)-fusion protein localizes to the cytoplasm; YML096W is not an essential gene and partially overlaps the verified gene RAD10
YBL099W	1301.08	0.388918	0.331185	0.959028	1301.08	0.252877	0.440879	0.999906	1301.08	0.136041	0.551414	0.999827	ATP1	Alpha subunit of the F1 sector of mitochondrial F1F0 ATP synthase, which is a large, evolutionarily conserved enzyme complex required for ATP synthesis; phosphorylated
YCL054W	274.864	-0.469129	0.304236	0.959028	274.864	-0.342881	0.412731	0.999906	274.864	-0.126247	0.512744	0.999827	SPB1	AdoMet-dependent methyltransferase involved in rRNA processing and 60S ribosomal subunit maturation; methylates G2922 in the tRNA docking site of the large subunit rRNA and in the absence of snR52, U2921; suppressor of PAB1 mutants
YAL012W	1485.5	0.321042	0.247377	0.959028	1485.5	0.136763	0.340884	0.999906	1485.5	0.184279	0.421185	0.999827	CYS3	Cystathionine gamma-lyase, catalyzes one of the two reactions involved in the transsulfuration pathway that yields cysteine from homocysteine with the intermediary formation of cystathionine
YLR114C	189.001	0.218555	0.369808	0.979138	189.001	0.354112	0.478646	0.999906	189.001	-0.135558	0.604859	0.999827	AVL9	Conserved protein involved in exocytic transport from the Golgi; mutation is synthetically lethal with apl2 vps1 double mutation; member of a protein superfamily with orthologs in diverse organisms
YOL058W	346.468	1.97062	0.378252	0.00020614	346.468	1.48253	0.511889	0.999906	346.468	0.488093	0.636347	0.999827	ARG1	Arginosuccinate synthetase, catalyzes the formation of L-argininosuccinate from citrulline and L-aspartate in the arginine biosynthesis pathway; potential Cdc28p substrate
YGL014W	131.335	-0.262392	0.354887	0.967178	131.335	0.0921698	0.454066	0.999906	131.335	-0.354562	0.576297	0.999827	PUF4	Member of the PUF protein family, which is defined by the presence of Pumilio homology domains that confer RNA binding activity; preferentially binds mRNAs encoding nucleolar ribosomal RNA-processing factors
YOR070C	36.4914	-0.00957167	0.495834	NA	36.4914	-0.0628431	0.584432	0.999906	36.4914	0.0532714	0.766414	0.999827	GYP1	Cis-golgi GTPase-activating protein (GAP) for the Rab family members Ypt1p (in vivo) and for Ypt1p, Sec4p, Ypt7p, and Ypt51p (in vitro); involved in vesicle docking and fusion
YEL052W	74.5927	0.0735559	0.416404	0.992604	74.5927	-0.122329	0.531456	0.999906	74.5927	0.195885	0.675152	0.999827	AFG1	Conserved protein that may act as a chaperone in the degradation of misfolded or unassembled cytochrome c oxidase subunits; localized to matrix face of the mitochondrial inner membrane; member of the AAA family but lacks a protease domain
YAL056W	61.6948	-0.408731	0.461644	NA	61.6948	-0.419246	0.551963	0.999906	61.6948	0.0105143	0.719569	0.999827	GPB2	Multistep regulator of cAMP-PKA signaling; inhibits PKA downstream of Gpa2p and Cyr1p, thereby increasing cAMP dependency; inhibits Ras activity through direct interactions with Ira1p/2p; regulated by G-alpha protein Gpa2p; homolog of Gpb1p
YER159C	50.0354	-0.258421	0.421803	NA	50.0354	0.15381	0.539249	0.999906	50.0354	-0.41223	0.684613	0.999827	BUR6	Subunit of a heterodimeric NC2 transcription regulator complex with Ncb2p; complex binds to TBP and can repress transcription by preventing preinitiation complex assembly or stimulate activated transcription; homologous to human NC2alpha
YGR078C	116.957	-0.46567	0.341876	0.959028	116.957	-0.318709	0.458691	0.999906	116.957	-0.146961	0.572081	0.999827	PAC10	Part of the heteromeric co-chaperone GimC/prefoldin complex, which promotes efficient protein folding
YJR031C	116.197	0.138834	0.395473	0.992604	116.197	0.174463	0.501007	0.999906	116.197	-0.0356289	0.638278	0.999827	GEA1	Guanine nucleotide exchange factor for ADP ribosylation factors (ARFs), involved in vesicular transport between the Golgi and ER, Golgi organization, and actin cytoskeleton organization; similar to but not functionally redundant with Gea2p
YNR035C	228.322	0.454985	0.300072	0.959028	228.322	0.311041	0.41393	0.999906	228.322	0.143944	0.511245	0.999827	ARC35	Subunit of the ARP2/3 complex, which is required for the motility and integrity of cortical actin patches; required for cortical localization of calmodulin
YMR036C	28.7996	0.199211	0.516516	NA	28.7996	0.075956	0.592642	0.999906	28.7996	0.123255	0.7861	0.999827	MIH1	Protein tyrosine phosphatase involved in cell cycle control; regulates the phosphorylation state of Cdc28p; homolog of S. pombe cdc25
YPL053C	89.3262	-0.2996	0.374306	0.959028	89.3262	0.222366	0.48918	0.999906	89.3262	-0.521965	0.615952	0.999827	KTR6	Probable mannosylphosphate transferase involved in the synthesis of core oligosaccharides in protein glycosylation pathway; member of the KRE2/MNT1 mannosyltransferase family
YML069W	222.903	0.0779692	0.303161	0.992604	222.903	-0.103753	0.412243	0.999906	222.903	0.181722	0.511712	0.999827	POB3	Subunit of the heterodimeric FACT complex (Spt16p-Pob3p), which associates with chromatin via interaction with Nhp6Ap and Nhp6Bp, and reorganizes nucleosomes to facilitate access to DNA by RNA and DNA polymerases
YOR340C	154.15	-0.169207	0.356006	0.992604	154.15	0.0610072	0.471754	0.999906	154.15	-0.230214	0.591008	0.999827	RPA43	RNA polymerase I subunit A43
YDL143W	427.8	0.0237108	0.277864	0.992604	427.8	-0.106942	0.382298	0.999906	427.8	0.130653	0.47261	0.999827	CCT4	Subunit of the cytosolic chaperonin Cct ring complex, related to Tcp1p, required for the assembly of actin and tubulins in vivo
YAR009C	119.869	-0.521778	0.459273	0.959028	119.869	0.646617	0.546715	0.999906	119.869	-1.1684	0.714025	0.999827		Retrotransposon TYA Gag and TYB Pol genes; in YARCTY1-1 TYB is mutant and probably non-functional
YGL063W	25.8013	-0.167823	0.557683	NA	25.8013	0.235725	0.626569	0.999906	25.8013	-0.403548	0.838789	0.999827	PUS2	Mitochondrial tRNA:pseudouridine synthase; acts at positions 27 and 28, but not at position 72; efficiently and rapidly targeted to mitochondria, specifically dedicated to mitochondrial tRNA modification
YFL004W	243.461	-0.129337	0.307944	0.992604	243.461	0.0403551	0.419066	0.999906	243.461	-0.169692	0.520042	0.999827	VTC2	Subunit of the vacuolar transporter chaperone (VTC) complex involved in membrane trafficking, vacuolar polyphosphate accumulation, microautophagy and non-autophagic vacuolar fusion
YDL204W	108.216	0.160103	0.623366	0.992604	108.216	-0.0491457	0.64383	0.999906	108.216	0.209249	0.89616	0.999827	RTN2	Protein of unknown function; has similarity to mammalian reticulon proteins; member of the RTNLA (reticulon-like A) subfamily
YLR325C	1190.26	-0.0457523	0.302501	0.992604	1190.26	0.0979642	0.407903	0.999906	1190.26	-0.143716	0.50783	0.999827	RPL38	Protein component of the large (60S) ribosomal subunit, has similarity to rat L38 ribosomal protein
YMR243C	227.516	0.000125395	0.310386	1	227.516	-0.0396264	0.408891	0.999906	227.516	0.0397518	0.513352	0.999827	ZRC1	Vacuolar membrane zinc transporter, transports zinc from the cytosol into the vacuole for storage; also has a role in resistance to zinc shock resulting from a sudden influx of zinc into the cytoplasm
YPL240C	2866.49	-0.525365	0.570317	0.959028	2866.49	0.140801	0.637731	0.999906	2866.49	-0.666166	0.855548	0.999827	HSP82	Hsp90 chaperone required for pheromone signaling and negative regulation of Hsf1p; docks with Tom70p for mitochondrial preprotein delivery; promotes telomerase DNA binding and nucleotide addition; interacts with Cns1p, Cpr6p, Cpr7p, Sti1p
YOR007C	674.18	0.372965	0.255843	0.959028	674.18	0.11428	0.35922	0.999906	674.18	0.258685	0.441015	0.999827	SGT2	Glutamine-rich cytoplasmic protein that serves as a scaffold for binding Get4/5p and other proteins required to mediate posttranslational insertion of tail-anchored proteins into the ER membrane; has similarity to human cochaperone SGT
YIL128W	80.4386	-0.370172	0.373152	0.959028	80.4386	-0.166005	0.482615	0.999906	80.4386	-0.204167	0.610048	0.999827	MET18	DNA repair and TFIIH regulator, required for both nucleotide excision repair (NER) and RNA polymerase II (RNAP II) transcription; involved in telomere maintenance
YGL126W	90.7772	0.678735	0.376696	0.957708	90.7772	0.45643	0.486051	0.999906	90.7772	0.222305	0.614896	0.999827	SCS3	Protein required for inositol prototrophy, identified as an ortholog of the FIT family of proteins involved in triglyceride droplet biosynthesis; disputed role in the synthesis of inositol phospholipids from inositol
YPL090C	4049.2	-0.455738	0.374136	0.959028	4049.2	-0.193015	0.484993	0.999906	4049.2	-0.262723	0.612532	0.999827	RPS6A	Protein component of the small (40S) ribosomal subunit; identical to Rps6Bp and has similarity to rat S6 ribosomal protein
YGL225W	423.058	0.357841	0.314191	0.959028	423.058	0.432431	0.424326	0.999906	423.058	-0.0745897	0.527983	0.999827	VRG4	Golgi GDP-mannose transporter; regulates Golgi function and glycosylation in Golgi
YLR163C	79.6334	0.315874	0.386043	0.959028	79.6334	-0.264953	0.498054	0.999906	79.6334	0.580827	0.630148	0.999827	MAS1	Smaller subunit of the mitochondrial processing protease (MPP), essential processing enzyme that cleaves the N-terminal targeting sequences from mitochondrially imported proteins
YBR028C	45.7658	0.0122607	0.468184	NA	45.7658	0.567628	0.564424	0.999906	45.7658	-0.555367	0.733289	0.999827		Putative protein kinase, possible substrate of cAMP-dependent protein kinase (PKA)
YDL240W	48.8913	0.0717422	0.472756	NA	48.8913	-0.287649	0.549335	0.999906	48.8913	0.359391	0.724754	0.999827	LRG1	Putative GTPase-activating protein (GAP) involved in the Pkc1p-mediated signaling pathway that controls cell wall integrity; appears to specifically regulate 1,3-beta-glucan synthesis
YGR285C	1472.76	-0.522805	0.316265	0.959028	1472.76	-0.149191	0.423485	0.999906	1472.76	-0.373613	0.528548	0.999827	ZUO1	Ribosome-associated chaperone, functions in ribosome biogenesis and, in partnership with Ssz1p and SSb1/2, as a chaperone for nascent polypeptide chains; contains a DnaJ domain and functions as a J-protein partner for Ssb1p and Ssb2p
YNL048W	79.4002	0.510954	0.377294	0.959028	79.4002	0.118959	0.499139	0.999906	79.4002	0.391994	0.625659	0.999827	ALG11	Alpha-1,2-mannosyltransferase, catalyzes sequential addition of the two terminal alpha 1,2-mannose residues to the Man5GlcNAc2-PP-dolichol intermediate during asparagine-linked glycosylation in the ER
YMR207C	65.6371	0.151835	0.429555	NA	65.6371	0.213706	0.520942	0.999906	65.6371	-0.061871	0.67518	0.999827	HFA1	Mitochondrial acetyl-coenzyme A carboxylase, catalyzes the production of malonyl-CoA in mitochondrial fatty acid biosynthesis
YDL191W	1333.44	-0.413475	0.317336	0.959028	1333.44	0.0756593	0.424909	0.999906	1333.44	-0.489135	0.53033	0.999827	RPL35A	Protein component of the large (60S) ribosomal subunit, identical to Rpl35Bp and has similarity to rat L35 ribosomal protein
YPR149W	550.378	0.0496805	0.404654	0.992604	550.378	0.11932	0.521963	0.999906	550.378	-0.0696395	0.660446	0.999827	NCE102	Protein of unknown function; contains transmembrane domains; involved in secretion of proteins that lack classical secretory signal sequences; component of the detergent-insoluble glycolipid-enriched complexes (DIGs)
YNL268W	235.221	-0.287756	0.324288	0.959028	235.221	0.1665	0.432675	0.999906	235.221	-0.454256	0.540711	0.999827	LYP1	Lysine permease; one of three amino acid permeases (Alp1p, Can1p, Lyp1p) responsible for uptake of cationic amino acids
YPR048W	43.5485	-0.164971	0.452152	NA	43.5485	-0.192068	0.551812	0.999906	43.5485	0.0270966	0.713396	0.999827	TAH18	Conserved NAPDH-dependent diflavin reductase, component of an early step in the cytosolic Fe-S protein assembly (CIA) machinery; transfers electrons from NADPH to the Fe-S cluster of Dre2p; plays a pro-death role under oxidative stress
YDL161W	73.7452	-0.388841	0.442045	0.959028	73.7452	-0.0314005	0.556073	0.999906	73.7452	-0.357441	0.710366	0.999827	ENT1	Epsin-like protein involved in endocytosis and actin patch assembly and functionally redundant with Ent2p; binds clathrin via a clathrin-binding domain motif at C-terminus
YDL060W	164.193	-0.579123	0.345453	0.959028	164.193	-0.339599	0.459153	0.999906	164.193	-0.239524	0.574595	0.999827	TSR1	Protein required for processing of 20S pre-rRNA in the cytoplasm, associates with pre-40S ribosomal particles
YFL062W	215.919	-0.035868	0.324935	0.992604	215.919	0.192476	0.442022	0.999906	215.919	-0.228344	0.5486	0.999827	COS4	Protein of unknown function, member of the DUP380 subfamily of conserved, often subtelomerically-encoded proteins
YEL007W	79.8524	0.240998	0.42916	0.982129	79.8524	-0.0600964	0.526526	0.999906	79.8524	0.301094	0.67926	0.999827		Putative protein with sequence similarity to S. pombe gti1+ (gluconate transport inducer 1)
YGL207W	731.208	0.314699	0.265488	0.959028	731.208	0.332447	0.364024	0.999906	731.208	-0.0177477	0.450551	0.999827	SPT16	Subunit of the heterodimeric FACT complex (Spt16p-Pob3p), which associates with chromatin via interaction with Nhp6Ap and Nhp6Bp, and reorganizes nucleosomes to facilitate access to DNA by RNA and DNA polymerases
YMR162C	118.026	0.157583	0.36705	0.992604	118.026	-0.205161	0.462773	0.999906	118.026	0.362744	0.590663	0.999827	DNF3	Aminophospholipid translocase (flippase) that maintains membrane lipid asymmetry in post-Golgi secretory vesicles; localizes to the trans-Golgi network; likely involved in protein transport; type 4 P-type ATPase
YOR124C	170.411	0.189991	0.332042	0.982129	170.411	0.136451	0.434743	0.999906	170.411	0.0535397	0.547033	0.999827	UBP2	Ubiquitin-specific protease that removes ubiquitin from ubiquitinated proteins; interacts with Rsp5p and is required for MVB sorting of membrane proteins; can cleave polyubiquitin and has isopeptidase activity
YLR105C	40.8212	-0.0904572	0.471985	NA	40.8212	0.0840504	0.545779	0.999906	40.8212	-0.174508	0.721543	0.999827	SEN2	Subunit of the tRNA splicing endonuclease, which is composed of Sen2p, Sen15p, Sen34p, and Sen54p; Sen2p contains the active site for tRNA 5' splice site cleavage and has similarity to Sen34p and to Archaeal tRNA splicing endonuclease
YOL049W	169.122	0.341913	0.338737	0.959028	169.122	-0.187494	0.452936	0.999906	169.122	0.529408	0.565589	0.999827	GSH2	Glutathione synthetase, catalyzes the ATP-dependent synthesis of glutathione (GSH) from gamma-glutamylcysteine and glycine; induced by oxidative stress and heat shock
YMR261C	317.282	0.0869785	0.311486	0.992604	317.282	0.635718	0.426466	0.999906	317.282	-0.548739	0.5281	0.999827	TPS3	Regulatory subunit of trehalose-6-phosphate synthase/phosphatase complex, which synthesizes the storage carbohydrate trehalose; expression is induced by stress conditions and repressed by the Ras-cAMP pathway
YPR185W	46.9972	0.416733	0.478575	NA	46.9972	0.556353	0.558436	0.999906	46.9972	-0.13962	0.735338	0.999827	ATG13	Regulatory subunit of the Atg1p signaling complex; stimulates Atg1p kinase activity; required for vesicle formation during autophagy and the cytoplasm-to-vacuole targeting (Cvt) pathway; involved in Atg9p, Atg23p, and Atg27p cycling
YHL028W	37.4324	-0.433413	0.644743	NA	37.4324	-0.0098448	0.596983	0.999906	37.4324	-0.423568	0.878682	0.999827	WSC4	ER membrane protein involved in the translocation of soluble secretory proteins and insertion of membrane proteins into the ER membrane; may also have a role in the stress response but has only partial functional overlap with WSC1-3
YOR362C	217.77	-0.0931357	0.35516	0.992604	217.77	0.0632964	0.474367	0.999906	217.77	-0.156432	0.592588	0.999827	PRE10	Alpha 7 subunit of the 20S proteasome
YEL043W	64.6439	-0.250845	0.431307	NA	64.6439	-0.326876	0.516697	0.999906	64.6439	0.0760309	0.673054	0.999827		Predicted cytoskeleton protein involved in intracellular signalling based on quantitative analysis of protein-protein interaction maps; may interact with ribosomes, based on co-purification studies; contains fibronectin type III domain fold
YBR208C	63.9281	0.0722853	0.45535	NA	63.9281	-0.0866394	0.554613	0.999906	63.9281	0.158925	0.717587	0.999827	DUR1,2	Urea amidolyase, contains both urea carboxylase and allophanate hydrolase activities, degrades urea to CO2 and NH3; expression sensitive to nitrogen catabolite repression and induced by allophanate, an intermediate in allantoin degradation
YFL026W	203.386	-0.641826	0.39399	0.959028	203.386	0.00503983	0.5076	0.999906	203.386	-0.646866	0.642562	0.999827	STE2	Receptor for alpha-factor pheromone; seven transmembrane-domain GPCR that interacts with both pheromone and a heterotrimeric G protein to initiate the signaling response that leads to mating between haploid a and alpha cells
YKL009W	117.787	-0.772861	0.335521	0.735749	117.787	0.25343	0.455439	0.999906	117.787	-1.02629	0.565689	0.999827	MRT4	Protein involved in mRNA turnover and ribosome assembly, localizes to the nucleolus
YAL034C	24.1438	-0.0267397	0.618315	NA	24.1438	-0.213751	0.532641	0.999906	24.1438	0.187012	0.8161	0.999827	FUN19	Non-essential protein of unknown function; expression induced in response to heat stress
YHR172W	55.4921	0.125396	0.412396	NA	55.4921	-0.130093	0.514791	0.999906	55.4921	0.255489	0.6596	0.999827	SPC97	Component of the microtubule-nucleating Tub4p (gamma-tubulin) complex; interacts with Spc110p at the spindle pole body (SPB) inner plaque and with Spc72p at the SPB outer plaque
YLR257W	189.563	-0.853907	0.343547	0.688072	189.563	0.000255525	0.459944	0.999906	189.563	-0.854162	0.574087	0.999827		Putative protein of unknown function
YJL158C	1769.79	0.139992	0.259789	0.986131	1769.79	-0.0847271	0.3553	0.999906	1769.79	0.224719	0.440146	0.999827	CIS3	Mannose-containing glycoprotein constituent of the cell wall; member of the PIR (proteins with internal repeats) family
YMR054W	195.574	-0.0708905	0.327209	0.992604	195.574	0.209267	0.433688	0.999906	195.574	-0.280158	0.543275	0.999827	STV1	Subunit a of the vacuolar-ATPase V0 domain, one of two isoforms (Stv1p and Vph1p); Stv1p is located in V-ATPase complexes of the Golgi and endosomes while Vph1p is located in V-ATPase complexes of the vacuole
YBR097W	48.3066	-0.613565	0.434089	NA	48.3066	0.241754	0.535146	0.999906	48.3066	-0.855319	0.689077	0.999827	VPS15	Myristoylated serine/threonine protein kinase involved in vacuolar protein sorting; functions as a membrane-associated complex with Vps34p; active form recruits Vps34p to the Golgi membrane; interacts with the GDP-bound form of Gpa1p
YML038C	44.9691	-0.517848	0.474205	NA	44.9691	-0.913592	0.573167	0.999906	44.9691	0.395744	0.743898	0.999827	YMD8	Putative nucleotide sugar transporter, has similarity to Vrg4p
YGR218W	693.725	0.283432	0.275574	0.959028	693.725	-0.0552492	0.376259	0.999906	693.725	0.338681	0.466381	0.999827	CRM1	Major karyopherin, involved in export of proteins, RNAs, and ribosomal subunits from the nucleus; exportin
YFL033C	74.2903	-0.130705	0.425247	0.992604	74.2903	-0.0979522	0.515346	0.999906	74.2903	-0.0327523	0.66814	0.999827	RIM15	Glucose-repressible protein kinase involved in signal transduction during cell proliferation in response to nutrients, specifically the establishment of stationary phase; identified as a regulator of IME2; substrate of Pho80p-Pho85p kinase
YER090W	347.588	0.505235	0.295147	0.959028	347.588	0.265877	0.404182	0.999906	347.588	0.239358	0.50047	0.999827	TRP2	Anthranilate synthase, catalyzes the initial step of tryptophan biosynthesis, forms multifunctional hetero-oligomeric anthranilate synthase:indole-3-glycerol phosphate synthase enzyme complex with Trp3p
YGR092W	74.1592	-0.811913	0.480438	0.959028	74.1592	-0.502431	0.585214	0.999906	74.1592	-0.309482	0.75716	0.999827	DBF2	Ser/Thr kinase involved in transcription and stress response; functions as part of a network of genes in exit from mitosis; localization is cell cycle regulated; activated by Cdc15p during the exit from mitosis
YNL118C	156.46	-0.158401	0.321285	0.992604	156.46	-0.172971	0.422041	0.999906	156.46	0.0145701	0.530417	0.999827	DCP2	Catalytic subunit of the Dcp1p-Dcp2p decapping enzyme complex, which removes the 5' cap structure from mRNAs prior to their degradation; member of the Nudix hydrolase family
YLR451W	73.115	-0.734873	0.44443	0.959028	73.115	-0.340555	0.546814	0.999906	73.115	-0.394318	0.704644	0.999827	LEU3	Zinc-finger transcription factor that regulates genes involved in branched chain amino acid biosynthesis and ammonia assimilation; positively regulated by alpha-isopropylmalate, an intermediate in leucine biosynthesis
YOR377W	37.6726	-0.117977	0.517799	NA	37.6726	-0.367455	0.596672	0.999906	37.6726	0.249478	0.790024	0.999827	ATF1	Alcohol acetyltransferase with potential roles in lipid and sterol metabolism; responsible for the major part of volatile acetate ester production during fermentation
YBR295W	39.6123	-0.926027	0.551918	NA	39.6123	-0.735359	0.620617	0.999906	39.6123	-0.190668	0.830513	0.999827	PCA1	Cadmium transporting P-type ATPase; may also have a role in copper and iron homeostasis; stabilized by Cd binding, which prevents ubiquitination; S288C and other lab strains contain a G970R mutation which eliminates Cd transport function
YLL039C	779.886	0.505392	0.355943	0.959028	779.886	0.416084	0.468253	0.999906	779.886	0.089309	0.58818	0.999827	UBI4	Ubiquitin, becomes conjugated to proteins, marking them for selective degradation via the ubiquitin-26S proteasome system; essential for the cellular stress response; encoded as a polyubiquitin precursor comprised of 5 head-to-tail repeats
YOL119C	64.3005	0.746216	0.420224	NA	64.3005	0.530982	0.535269	0.999906	64.3005	0.215234	0.680426	0.999827	MCH4	Protein with similarity to mammalian monocarboxylate permeases, which are involved in transport of monocarboxylic acids across the plasma membrane; mutant is not deficient in monocarboxylate transport
YKR016W	77.7929	-0.415331	0.401183	0.959028	77.7929	0.322023	0.522374	0.999906	77.7929	-0.737354	0.658649	0.999827	FCJ1	Mitochondrial inner membrane protein involved in formation and molecular structure of crista junctions; impairs oligomerization of F1F0-ATP synthase; null shows altered mitochondrial morphology and abnormal mitochondrial genome maintenance
YMR010W	53.9166	-0.686826	0.417732	NA	53.9166	-0.0216501	0.524728	0.999906	53.9166	-0.665176	0.670707	0.999827		Putative protein of unknown function; green fluorescent protein (GFP)-fusion protein localizes to the cytoplasm; YMR010W is not an essential gene; YMR010W mRNA is transcribed with ADI1
YLR330W	373.582	0.0927513	0.283572	0.992604	373.582	0.0749837	0.384202	0.999906	373.582	0.0177676	0.477518	0.999827	CHS5	Component of the exomer complex, which also contains Csh6p, Bch1p, Bch2p, and Bud7p and is involved in export of selected proteins, such as chitin synthase Chs3p, from the Golgi to the plasma membrane
YPR091C	84.1173	0.151065	0.411576	0.992604	84.1173	-0.06818	0.52561	0.999906	84.1173	0.219245	0.66757	0.999827		Putative protein of unknown function; may interact with ribosomes, based on co-purification experiments; green fluorescent protein (GFP)-fusion protein localizes to the endoplasmic reticulum; YPR091C is not an essential gene
YPR190C	112.17	-0.529688	0.36034	0.959028	112.17	-0.102662	0.470822	0.999906	112.17	-0.427026	0.592891	0.999827	RPC82	RNA polymerase III subunit C82
YPL211W	60.9821	-0.00590358	0.460301	NA	60.9821	-0.0360772	0.572625	0.999906	60.9821	0.0301736	0.734689	0.999827	NIP7	Nucleolar protein required for 60S ribosome subunit biogenesis, constituent of 66S pre-ribosomal particles; physically interacts with Nop8p and the exosome subunit Rrp43p
YJR035W	38.3233	0.791035	0.468942	NA	38.3233	0.109623	0.564474	0.999906	38.3233	0.681412	0.733756	0.999827	RAD26	Protein involved in transcription-coupled nucleotide excision repair of UV-induced DNA lesions; recruitment to DNA lesions is dependent on an elongating RNA polymerase II; homolog of human CSB protein
YKR070W	84.1095	0.276064	0.385473	0.967178	84.1095	0.0404647	0.513044	0.999906	84.1095	0.2356	0.641705	0.999827		Putative protein of unknown function; the authentic, non-tagged protein is detected in highly purified mitochondria in high-throughput studies
YHR073W	88.7352	-0.199243	0.388204	0.987757	88.7352	-0.66285	0.485656	0.999906	88.7352	0.463607	0.621748	0.999827	OSH3	Member of an oxysterol-binding protein family with seven members in S. cerevisiae; family members have overlapping, redundant functions in sterol metabolism and collectively perform a function essential for viability
YOL018C	44.9224	-0.214198	0.44445	NA	44.9224	0.477367	0.549787	0.999906	44.9224	-0.691565	0.706947	0.999827	TLG2	Syntaxin-like t-SNARE that forms a complex with Tlg1p and Vti1p and mediates fusion of endosome-derived vesicles with the late Golgi; binds Vps45p, which prevents Tlg2p degradation and also facilitates t-SNARE complex formation
YDR025W	1502.49	0.256149	0.254037	0.959028	1502.49	-0.0701697	0.34735	0.999906	1502.49	0.326319	0.430334	0.999827	RPS11A	Protein component of the small (40S) ribosomal subunit; identical to Rps11Bp and has similarity to E. coli S17 and rat S11 ribosomal proteins
YBL051C	156.407	-0.327904	0.352517	0.959028	156.407	0.159563	0.462239	0.999906	156.407	-0.487468	0.581319	0.999827	PIN4	Protein involved in G2/M phase progression and response to DNA damage, interacts with Rad53p; contains an RNA recognition motif, a nuclear localization signal, and several SQ/TQ cluster domains; hyperphosphorylated in response to DNA damage
YLR077W	46.9767	-0.801755	0.474847	NA	46.9767	-0.174343	0.567032	0.999906	46.9767	-0.627412	0.739601	0.999827	FMP25	Mitochondrial inner membrane protein required for an early step in assembly of respiratory complex III (cytochrome bc1 complex); mRNA is targeted to mitochondria
YOR276W	207.764	-0.247498	0.305603	0.959028	207.764	-0.294835	0.422785	0.999906	207.764	0.0473363	0.521671	0.999827	CAF20	Phosphoprotein of the mRNA cap-binding complex involved in translational control, repressor of cap-dependent translation initiation, competes with eIF4G for binding to eIF4E
YML092C	136.251	0.446208	0.341467	0.959028	136.251	-0.0244452	0.472931	0.999906	136.251	0.470654	0.583312	0.999827	PRE8	Alpha 2 subunit of the 20S proteasome
YGL054C	79.9133	0.385343	0.400247	0.959028	79.9133	0.274403	0.525446	0.999906	79.9133	0.11094	0.660487	0.999827	ERV14	Protein localized to COPII-coated vesicles, involved in vesicle formation and incorporation of specific secretory cargo; required for the delivery of bud-site selection protein Axl2p to cell surface; related to Drosophila cornichon
YCL050C	349.617	0.336303	0.283132	0.959028	349.617	0.220786	0.391802	0.999906	349.617	0.115518	0.483394	0.999827	APA1	Diadenosine 5',5''-P1,P4-tetraphosphate phosphorylase I (AP4A phosphorylase), involved in catabolism of bis(5'-nucleosidyl) tetraphosphates; has similarity to Apa2p
YOR355W	77.2644	0.114181	0.425563	0.992604	77.2644	-0.386804	0.517134	0.999906	77.2644	0.500985	0.669728	0.999827	GDS1	Protein of unknown function, required for growth on glycerol as a carbon source; the authentic, non-tagged protein is detected in highly purified mitochondria in high-throughput studies
YML026C	1215.59	-0.544333	0.294538	0.926773	1215.59	0.200811	0.398664	0.999906	1215.59	-0.745144	0.495667	0.999827	RPS18B	Protein component of the small (40S) ribosomal subunit; nearly identical to Rps18Ap and has similarity to E. coli S13 and rat S18 ribosomal proteins
YMR199W	69.8023	0.281031	0.418647	0.967178	69.8023	0.591687	0.515269	0.999906	69.8023	-0.310656	0.663863	0.999827	CLN1	G1 cyclin involved in regulation of the cell cycle; activates Cdc28p kinase to promote the G1 to S phase transition; late G1 specific expression depends on transcription factor complexes, MBF (Swi6p-Mbp1p) and SBF (Swi6p-Swi4p)
YHR037W	129.457	0.345049	0.350926	0.959028	129.457	-0.024158	0.479958	0.999906	129.457	0.369207	0.594557	0.999827	PUT2	Delta-1-pyrroline-5-carboxylate dehydrogenase, nuclear-encoded mitochondrial protein involved in utilization of proline as sole nitrogen source; deficiency of the human homolog causes HPII, an autosomal recessive inborn error of metabolism
YHR114W	110.106	-0.0951992	0.354381	0.992604	110.106	-0.0320959	0.464124	0.999906	110.106	-0.0631032	0.583945	0.999827	BZZ1	SH3 domain protein implicated in the regulation of actin polymerization, able to recruit actin polymerization machinery through its SH3 domains, colocalizes with cortical actin patches and Las17p, interacts with type I myosins
YDL174C	83.3988	0.290531	0.370013	0.959028	83.3988	0.364712	0.484244	0.999906	83.3988	-0.0741808	0.609401	0.999827	DLD1	D-lactate dehydrogenase, oxidizes D-lactate to pyruvate, transcription is heme-dependent, repressed by glucose, and derepressed in ethanol or lactate; located in the mitochondrial inner membrane
YLR033W	63.2536	-0.213076	0.465638	NA	63.2536	-0.256663	0.562878	0.999906	63.2536	0.0435874	0.730514	0.999827	RSC58	Component of the RSC chromatin remodeling complex; RSC functions in transcriptional regulation and elongation, chromosome stability, and establishing sister chromatid cohesion; involved in telomere maintenance
YOR030W	24.7615	0.207737	0.579998	NA	24.7615	0.259395	0.610021	0.999906	24.7615	-0.051658	0.841635	0.999827	DFG16	Probable multiple transmembrane protein, involved in diploid invasive and pseudohyphal growth upon nitrogen starvation; required for accumulation of processed Rim101p
YOR232W	76.3192	0.487648	0.399375	0.959028	76.3192	0.374257	0.51102	0.999906	76.3192	0.113391	0.648516	0.999827	MGE1	Mitochondrial matrix cochaperone, acts as a nucleotide release factor for Ssc1p in protein translocation and folding; also acts as cochaperone for Ssq1p in folding of Fe-S cluster proteins; homolog of E. coli GrpE
YOR113W	30.6463	0.0151804	0.512873	NA	30.6463	0.0331898	0.594835	0.999906	30.6463	-0.0180095	0.785385	0.999827	AZF1	Zinc-finger transcription factor, involved in induction of CLN3 transcription in response to glucose; genetic and physical interactions indicate a possible role in mitochondrial transcription or genome maintenance
YGL122C	119.198	-0.581679	0.34317	0.959028	119.198	-0.547706	0.464897	0.999906	119.198	-0.0339732	0.577835	0.999827	NAB2	Nuclear polyadenylated RNA-binding protein required for nuclear mRNA export and poly(A) tail length control; binds nuclear pore protein Mlp1p; autoregulates mRNA levels; related to human hnRNPs; nuclear localization sequence binds Kap104p
YMR203W	332.346	0.142238	0.286187	0.99256	332.346	0.456621	0.394008	0.999906	332.346	-0.314383	0.486972	0.999827	TOM40	Component of the TOM (translocase of outer membrane) complex responsible for recognition and initial import steps for all mitochondrially directed proteins; constitutes the core element of the protein conducting pore
YGR281W	226.272	-0.328857	0.34214	0.959028	226.272	0.25536	0.452621	0.999906	226.272	-0.584217	0.567384	0.999827	YOR1	Plasma membrane ATP-binding cassette (ABC) transporter, multidrug transporter mediates export of many different organic anions including oligomycin; similar to human cystic fibrosis transmembrane receptor (CFTR)
YGL023C	77.9385	0.0314448	0.401559	0.992604	77.9385	-0.00294426	0.507776	0.999906	77.9385	0.034389	0.647362	0.999827	PIB2	Protein binding phosphatidylinositol 3-phosphate, involved in telomere-proximal repression of gene expression; similar to Fab1 and Vps27
YGL221C	109.579	0.137112	0.348273	0.992604	109.579	0.115961	0.46612	0.999906	109.579	0.0211514	0.581849	0.999827	NIF3	Protein of unknown function, similar to Listeria monocytogenes major sigma factor (rpoD gene product); the authentic, non-tagged protein is detected in highly purified mitochondria in high-throughput studies
YHR163W	117.024	-0.0057638	0.345378	0.996693	117.024	0.125245	0.471373	0.999906	117.024	-0.131009	0.584353	0.999827	SOL3	6-phosphogluconolactonase, catalyzes the second step of the pentose phosphate pathway; weak multicopy suppressor of los1-1 mutation; homologous to Sol2p and Sol1p
YMR079W	333.933	-0.0975359	0.283813	0.992604	333.933	-0.147847	0.388967	0.999906	333.933	0.0503113	0.481503	0.999827	SEC14	Phosphatidylinositol/phosphatidylcholine transfer protein; involved in regulating PtdIns, PtdCho, and ceramide metabolism, products of which regulate intracellular transport and UPR; functionally homologous to mammalian PITPs
YAL025C	137.198	-0.68832	0.325179	0.829774	137.198	-0.00330064	0.431647	0.999906	137.198	-0.68502	0.540428	0.999827	MAK16	Essential nuclear protein, constituent of 66S pre-ribosomal particles; required for maturation of 25S and 5.8S rRNAs; required for maintenance of M1 satellite double-stranded RNA of the L-A virus
YDL103C	138.092	0.585247	0.388894	0.959028	138.092	-0.110063	0.508646	0.999906	138.092	0.695311	0.640277	0.999827	QRI1	UDP-N-acetylglucosamine pyrophosphorylase, catalyzes the formation of UDP-N-acetylglucosamine (UDP-GlcNAc), which is important in cell wall biosynthesis, protein N-glycosylation, and GPI anchor biosynthesis
YLR167W	3992.6	-0.293898	0.297946	0.959028	3992.6	0.0822398	0.399261	0.999906	3992.6	-0.376138	0.498177	0.999827	RPS31	Fusion protein that is cleaved to yield a ribosomal protein of the small (40S) subunit and ubiquitin; ubiquitin may facilitate assembly of the ribosomal protein into ribosomes; interacts genetically with translation factor eIF2B
YLR264W	840.109	-0.210792	0.297103	0.967178	840.109	0.286461	0.405656	0.999906	840.109	-0.497254	0.502819	0.999827	RPS28B	Protein component of the small (40S) ribosomal subunit; nearly identical to Rps28Ap and has similarity to rat S28 ribosomal protein
YLL050C	425.172	0.544839	0.313652	0.959028	425.172	0.32957	0.420456	0.999906	425.172	0.215268	0.524556	0.999827	COF1	Cofilin, promotes actin filament depolarization in a pH-dependent manner; binds both actin monomers and filaments and severs filaments; thought to be regulated by phosphorylation at SER4; ubiquitous and essential in eukaryotes
YML128C	320.088	0.683317	0.584504	0.959028	320.088	0.394781	0.642768	0.999906	320.088	0.288536	0.86879	0.999827	MSC1	Protein of unknown function; mutant is defective in directing meiotic recombination events to homologous chromatids; the authentic, non-tagged protein is detected in highly purified mitochondria and is phosphorylated
YLR066W	70.739	-0.00805749	0.414545	0.996693	70.739	0.173274	0.531319	0.999906	70.739	-0.181331	0.673896	0.999827	SPC3	Subunit of signal peptidase complex (Spc1p, Spc2p, Spc3p, Sec11p), which catalyzes cleavage of N-terminal signal sequences of proteins targeted to the secretory pathway; homologous to mammalian SPC22/23
YJL084C	70.1827	-0.230246	0.419138	0.984537	70.1827	0.107765	0.520602	0.999906	70.1827	-0.338011	0.668352	0.999827	ALY2	Protein proposed to regulate the endocytosis of plasma membrane proteins; interacts with the cyclin Pcl7p and ubiquitin ligase Rsp5p; phosphorylated by the cyclin-CDK complex, Pcl7p-Pho85p; mRNA is cell cycle regulated, peaking in M phase
YER081W	221.453	-0.148124	0.327061	0.992604	221.453	-0.0788248	0.436957	0.999906	221.453	-0.0692994	0.545802	0.999827	SER3	3-phosphoglycerate dehydrogenase, catalyzes the first step in serine and glycine biosynthesis; isozyme of Ser33p
YNL008C	43.2467	-0.0578256	0.463927	NA	43.2467	0.594463	0.553997	0.999906	43.2467	-0.652289	0.722543	0.999827	ASI3	Putative integral membrane E3 ubiquitin ligase; acts with Asi1p and Asi2p to ensure the fidelity of SPS-sensor signalling by maintaining the dormant repressed state of gene expression in the absence of inducing signals
YJR060W	76.6755	-0.0733445	0.393931	0.992604	76.6755	-0.247227	0.50243	0.999906	76.6755	0.173882	0.638449	0.999827	CBF1	Helix-loop-helix protein that binds the motif CACRTG, which is present at several sites including MET gene promoters and centromere DNA element I (CDEI); required for nucleosome positioning at this motif; targets Isw1p to DNA
YBL105C	123.167	-0.070945	0.346663	0.992604	123.167	0.546182	0.447664	0.999906	123.167	-0.617127	0.566184	0.999827	PKC1	Protein serine/threonine kinase essential for cell wall remodeling during growth; localized to sites of polarized growth and the mother-daughter bud neck; homolog of the alpha, beta, and gamma isoforms of mammalian protein kinase C (PKC)
YHR026W	271.039	0.464691	0.318742	0.959028	271.039	0.185067	0.436247	0.999906	271.039	0.279624	0.54028	0.999827	VMA16	Subunit c'' of the vacuolar ATPase, which functions in acidification of the vacuole; one of three proteolipid subunits of the V0 domain
YNL080C	43.7415	-0.709753	0.483419	NA	43.7415	-0.058498	0.5754	0.999906	43.7415	-0.651255	0.751523	0.999827	EOS1	Protein involved in N-glycosylation; deletion mutation confers sensitivity to exidative stress and shows synthetic lethality with mutations in the spindle checkpoint genes BUB3 and MAD1; YNL080C is not an essential gene
YMR100W	50.7531	-0.896755	0.449542	NA	50.7531	-0.604273	0.529298	0.999906	50.7531	-0.292482	0.694422	0.999827	MUB1	MYND domain-containing protein required for ubiquitination and turnover of Rpn4p; interacts with Ubr2p (E3) and indirectly with Rad6p (E2); short-lived protein degraded in a Ubr2p/Rad6p dependent manner; similar to the A. nidulans samB gene
YER009W	362.965	0.367872	0.302217	0.959028	362.965	0.285091	0.409557	0.999906	362.965	0.0827808	0.508988	0.999827	NTF2	Nuclear envelope protein, interacts with GDP-bound Gsp1p and with proteins of the nuclear pore to transport Gsp1p into the nucleus where it is an essential player in nucleocytoplasmic transport
YLR220W	72.9981	0.473247	0.400933	0.959028	72.9981	-0.227056	0.513234	0.999906	72.9981	0.700302	0.65127	0.999827	CCC1	Putative vacuolar Fe2+/Mn2+ transporter; suppresses respiratory deficit of yfh1 mutants, which lack the ortholog of mammalian frataxin, by preventing mitochondrial iron accumulation
YPR181C	687.5	0.299938	0.264819	0.959028	687.5	0.379378	0.364052	0.999906	687.5	-0.0794399	0.45018	0.999827	SEC23	GTPase-activating protein, stimulates the GTPase activity of Sar1p; component of the Sec23p-Sec24p heterodimer of the COPII vesicle coat, involved in ER to Golgi transport
YNR046W	70.9493	-0.155166	0.390382	0.992604	70.9493	0.503484	0.513387	0.999906	70.9493	-0.65865	0.644936	0.999827	TRM112	Subunit of tRNA methyltransferase (MTase) complexes in combination with Trm9p and Trm11p; subunit of complex with Mtq2p that methylates Sup45p (eRF1) in the ternary complex eRF1-eRF3-GTP; deletion confers resistance to zymocin
YPL266W	100.428	-0.197625	0.370377	0.986155	100.428	0.270784	0.490526	0.999906	100.428	-0.468409	0.614645	0.999827	DIM1	Essential 18S rRNA dimethylase (dimethyladenosine transferase), responsible for conserved m6(2)Am6(2)A dimethylation in 3'-terminal loop of 18S rRNA, part of 90S and 40S pre-particles in nucleolus, involved in pre-ribosomal RNA processing
YLR303W	926.137	0.607491	0.290731	0.829774	926.137	0.484355	0.398983	0.999906	926.137	0.123136	0.49367	0.999827	MET17	Methionine and cysteine synthase (O-acetyl homoserine-O-acetyl serine sulfhydrylase), required for sulfur amino acid synthesis
YGL001C	142.433	0.351099	0.391162	0.959028	142.433	-0.0358758	0.50743	0.999906	142.433	0.386975	0.640693	0.999827	ERG26	C-3 sterol dehydrogenase, catalyzes the second of three steps required to remove two C-4 methyl groups from an intermediate in ergosterol biosynthesis
YCR069W	134.485	-0.0195925	0.360527	0.992952	134.485	0.164155	0.483677	0.999906	134.485	-0.183747	0.603251	0.999827	CPR4	Peptidyl-prolyl cis-trans isomerase (cyclophilin), catalyzes the cis-trans isomerization of peptide bonds N-terminal to proline residues; has a potential role in the secretory pathway
YML073C	2231.97	-0.00571652	0.254798	0.996693	2231.97	-0.00141901	0.349915	0.999906	2231.97	-0.00429751	0.432854	0.999827	RPL6A	N-terminally acetylated protein component of the large (60S) ribosomal subunit, has similarity to Rpl6Bp and to rat L6 ribosomal protein; binds to 5.8S rRNA
YEL047C	376.452	0.400116	0.278509	0.959028	376.452	0.484758	0.390766	0.999906	376.452	-0.0846416	0.479853	0.999827		Soluble fumarate reductase, required with isoenzyme Osm1p for anaerobic growth; may interact with ribosomes, based on co-purification experiments; authentic, non-tagged protein is detected in purified mitochondria in high-throughput studies
YAL043C	106.952	-0.191317	0.369697	0.987757	106.952	-0.105021	0.474332	0.999906	106.952	-0.0862951	0.601386	0.999827	PTA1	Subunit of holo-CPF, a multiprotein complex and functional homolog of mammalian CPSF, required for the cleavage and polyadenylation of mRNA and snoRNA 3' ends; involved in pre-tRNA processing; binds to the phosphorylated CTD of RNAPII
YHR206W	55.1719	0.252359	0.440206	NA	55.1719	0.0686711	0.542487	0.999906	55.1719	0.183688	0.698604	0.999827	SKN7	Nuclear response regulator and transcription factor, part of a branched two-component signaling system; required for optimal induction of heat-shock genes in response to oxidative stress; involved in osmoregulation
YDL121C	82.2878	-0.0938841	0.414274	0.992604	82.2878	0.36343	0.535168	0.999906	82.2878	-0.457314	0.676765	0.999827		Putative protein of unknown function; green fluorescent protein (GFP)-fusion protein localizes to the endoplasmic reticulum; YDL121C is not an essential protein
YDL020C	109.405	0.672267	0.381849	0.959028	109.405	0.0396755	0.487852	0.999906	109.405	0.632591	0.619513	0.999827	RPN4	Transcription factor that stimulates expression of proteasome genes; Rpn4p levels are in turn regulated by the 26S proteasome in a negative feedback control mechanism; RPN4 is transcriptionally regulated by various stress responses
YFL022C	521.047	0.0443753	0.276636	0.992604	521.047	0.0311681	0.381421	0.999906	521.047	0.0132072	0.471178	0.999827	FRS2	Alpha subunit of cytoplasmic phenylalanyl-tRNA synthetase, forms a tetramer with Frs1p to form active enzyme; evolutionarily distant from mitochondrial phenylalanyl-tRNA synthetase based on protein sequence, but substrate binding is similar
YJR042W	128.814	-0.127057	0.347944	0.992604	128.814	0.0737258	0.456107	0.999906	128.814	-0.200783	0.573668	0.999827	NUP85	Subunit of the Nup84p subcomplex of the nuclear pore complex (NPC), required for assembly of the subcomplex and also for formation of the nucleocytoplasmic Gsp1p concentration gradient that plays a role in nuclear trafficking
YOR065W	185.37	-0.281336	0.463829	0.979138	185.37	0.128013	0.579946	0.999906	185.37	-0.409349	0.742613	0.999827	CYT1	Cytochrome c1, component of the mitochondrial respiratory chain; expression is regulated by the heme-activated, glucose-repressed Hap2p/3p/4p/5p CCAAT-binding complex
YNL329C	48.0825	0.391926	0.499698	NA	48.0825	-0.130368	0.586461	0.999906	48.0825	0.522294	0.770469	0.999827	PEX6	AAA-peroxin that heterodimerizes with AAA-peroxin Pex1p and participates in the recycling of peroxisomal signal receptor Pex5p from the peroxisomal membrane to the cystosol
YGL203C	171.672	-0.456328	0.308424	0.959028	171.672	0.147531	0.419957	0.999906	171.672	-0.603859	0.521046	0.999827	KEX1	Protease involved in the processing of killer toxin and alpha factor precursor; cleaves Lys and Arg residues from the C-terminus of peptides and proteins
YDR080W	44.2693	0.320463	0.448161	NA	44.2693	0.118908	0.555882	0.999906	44.2693	0.201555	0.714001	0.999827	VPS41	Vacuolar membrane protein that is a subunit of the homotypic vacuole fusion and vacuole protein sorting (HOPS) complex; essential for membrane docking and fusion at the Golgi-to-endosome and endosome-to-vacuole stages of protein transport
YLR088W	141.149	-0.0373346	0.367165	0.992604	141.149	-0.0392764	0.486075	0.999906	141.149	0.00194182	0.609161	0.999827	GAA1	Subunit of the GPI (glycosylphosphatidylinositol):protein transamidase complex, removes the GPI-anchoring signal and attaches GPI to proteins in the ER
YKL148C	181.053	0.139767	0.379444	0.992604	181.053	0.325932	0.498149	0.999906	181.053	-0.186164	0.626194	0.999827	SDH1	Flavoprotein subunit of succinate dehydrogenase (Sdh1p, Sdh2p, Sdh3p, Sdh4p), which couples the oxidation of succinate to the transfer of electrons to ubiquinone as part of the TCA cycle and the mitochondrial respiratory chain
YJR006W	59.7256	0.169512	0.426303	NA	59.7256	0.559477	0.534471	0.999906	59.7256	-0.389965	0.683628	0.999827	POL31	DNA polymerase III (delta) subunit, essential for cell viability; involved in DNA replication and DNA repair
YAL007C	178.313	0.447646	0.322388	0.959028	178.313	0.375564	0.451689	0.999906	178.313	0.0720817	0.554921	0.999827	ERP2	Protein that forms a heterotrimeric complex with Erp1p, Emp24p, and Erv25p; member, along with Emp24p and Erv25p, of the p24 family involved in ER to Golgi transport and localized to COPII-coated vesicles
YKR025W	83.0794	-0.31692	0.374294	0.959028	83.0794	0.62711	0.502076	0.999906	83.0794	-0.94403	0.626232	0.999827	RPC37	RNA polymerase III subunit C37
YBR187W	174.19	-0.258394	0.31254	0.959028	174.19	0.347908	0.431161	0.999906	174.19	-0.606301	0.53252	0.999827	GDT1	Putative protein of unknown function; expression is reduced in a gcr1 null mutant; GFP-fusion protein localizes to the vacuole; expression pattern and physical interactions suggest a possible role in ribosome biogenesis
YEL038W	88.942	-0.1871	0.363622	0.987757	88.942	0.270561	0.495066	0.999906	88.942	-0.457661	0.614246	0.999827	UTR4	Protein with sequence similarity to 2,3-diketo-5-methylthiopentyl-1-phosphate enolase-phosphatases, involved in methionine salvage; found in both the cytoplasm and nucleus
YML113W	35.088	-0.474738	0.494821	NA	35.088	-0.331092	0.587654	0.999906	35.088	-0.143646	0.768235	0.999827	DAT1	DNA binding protein that recognizes oligo(dA).oligo(dT) tracts; Arg side chain in its N-terminal pentad Gly-Arg-Lys-Pro-Gly repeat is required for DNA-binding; not essential for viability
YPR055W	61.9472	0.145735	0.401844	NA	61.9472	0.17963	0.510902	0.999906	61.9472	-0.0338956	0.649969	0.999827	SEC8	Essential 121kDa subunit of the exocyst complex (Sec3p, Sec5p, Sec6p, Sec8p, Sec10p, Sec15p, Exo70p, and Exo84p), which has the essential function of mediating polarized targeting of secretory vesicles to active sites of exocytosis
YJL073W	50.6717	0.298187	0.472956	NA	50.6717	0.203386	0.565465	0.999906	50.6717	0.0948012	0.737156	0.999827	JEM1	DnaJ-like chaperone required for nuclear membrane fusion during mating, localizes to the ER membrane; exhibits genetic interactions with KAR2
YGR210C	145.909	-0.228067	0.335799	0.967178	145.909	0.241349	0.447413	0.999906	145.909	-0.469416	0.559407	0.999827		Putative protein of unknown function; green fluorescent protein (GFP)-fusion protein localizes to the cytoplasm
YDR257C	59.6082	-0.473263	0.429283	NA	59.6082	-0.0271294	0.539151	0.999906	59.6082	-0.446134	0.689179	0.999827	RKM4	Ribosomal lysine methyltransferase specific for monomethylation of Rpl42ap and Rpl42bp (lysine 55); nuclear SET-domain containing protein
YOR290C	189.209	-0.653381	0.351763	0.919615	189.209	-0.579719	0.454148	0.999906	189.209	-0.0736622	0.574444	0.999827	SNF2	Catalytic subunit of the SWI/SNF chromatin remodeling complex involved in transcriptional regulation; contains DNA-stimulated ATPase activity; functions interdependently in transcriptional activation with Snf5p and Snf6p
YBR017C	223.029	0.160653	0.300438	0.986155	223.029	0.141152	0.40329	0.999906	223.029	0.019501	0.502894	0.999827	KAP104	Transportin or cytosolic karyopherin beta 2; functions in the rg-nuclear localization signal-mediated nuclear import/reimport of mRNA-binding proteins Nab2p and Hrp1p; regulates asymmetric protein synthesis in daughter cells during mitosis
YDL192W	621.267	0.00514943	0.258363	0.996693	621.267	0.174323	0.355657	0.999906	621.267	-0.169174	0.439594	0.999827	ARF1	ADP-ribosylation factor, GTPase of the Ras superfamily involved in regulation of coated vesicle formation in intracellular trafficking within the Golgi; functionally interchangeable with Arf2p
Q0085	117.976	-0.1729	0.646131	0.992604	117.976	0.162627	0.615069	0.999906	117.976	-0.335527	0.892073	0.999827	ATP6	Mitochondrially encoded subunit a of the F0 sector of mitochondrial F1F0 ATP synthase; translation is specifically activated by Atp22p; ATP6 and ATP8 mRNAs are not translated in the absence of the F1 sector of ATPase
YGL238W	253.255	0.132548	0.300698	0.992604	253.255	0.0858167	0.398863	0.999906	253.255	0.0467313	0.499508	0.999827	CSE1	Nuclear envelope protein that mediates the nuclear export of importin alpha (Srp1p), homolog of metazoan CAS protein, required for accurate chromosome segregation
YAR014C	127.114	-0.099383	0.35909	0.992604	127.114	0.201728	0.464379	0.999906	127.114	-0.301111	0.587017	0.999827	BUD14	Protein involved in bud-site selection, Bud14p-Glc7p complex is a cortical regulator of dynein; inhibitor of the actin assembly factor Bnr1p (formin); diploid mutants display a random budding pattern instead of the wild-type bipolar pattern
YGL119W	46.5688	-0.275103	0.440699	NA	46.5688	0.206357	0.54984	0.999906	46.5688	-0.481459	0.704644	0.999827	COQ8	Protein required for ubiquinone (coenzyme Q) biosynthesis and for respiratory growth; exhibits genetic interaction with COQ9, suggesting a common function; similar to prokaryotic proteins involved in early steps of ubiquinone biosynthesis
YIL153W	67.121	-0.506194	0.455691	0.959028	67.121	0.324307	0.570047	0.999906	67.121	-0.830501	0.729802	0.999827	RRD1	Peptidyl-prolyl cis/trans-isomerase, activator of the phosphotyrosyl phosphatase activity of PP2A; involved in G1 phase progression, microtubule dynamics, bud morphogenesis and DNA repair; subunit of the Tap42p-Sit4p-Rrd1p complex
YER010C	44.5051	0.669939	0.448285	NA	44.5051	-0.0403864	0.552996	0.999906	44.5051	0.710325	0.711828	0.999827		Protein of unknown function, forms a ring-shaped homotrimer; has similarity to members of the prokaryotic rraA family; possibly involved in a phosphotransfer reaction
YGR175C	729.103	0.0890935	0.258857	0.992604	729.103	0.0708443	0.356658	0.999906	729.103	0.0182492	0.440694	0.999827	ERG1	Squalene epoxidase, catalyzes the epoxidation of squalene to 2,3-oxidosqualene; plays an essential role in the ergosterol-biosynthesis pathway and is the specific target of the antifungal drug terbinafine
YLR293C	1282.09	0.0760071	0.282629	0.992604	1282.09	0.124114	0.381807	0.999906	1282.09	-0.0481071	0.475032	0.999827	GSP1	Ran GTPase, GTP binding protein (mammalian Ranp homolog) involved in the maintenance of nuclear organization, RNA processing and transport; regulated by Srm1p, Rna1p, Yrb1p, Yrb2p, Yrp4p, Yrb30p, Cse1p and Kap95p; yeast Gsp2p homolog
YGL191W	135.516	0.534288	0.365916	0.959028	135.516	0.291425	0.498642	0.999906	135.516	0.242863	0.618475	0.999827	COX13	Subunit VIa of cytochrome c oxidase, which is the terminal member of the mitochondrial inner membrane electron transport chain; not essential for cytochrome c oxidase activity but may modulate activity in response to ATP
YBR170C	84.5788	0.0583864	0.377143	0.992604	84.5788	0.388443	0.497358	0.999906	84.5788	-0.330057	0.624155	0.999827	NPL4	Endoplasmic reticulum and nuclear membrane protein, forms a complex with Cdc48p and Ufd1p that recognizes ubiquitinated proteins in the endoplasmic reticulum and delivers them to the proteasome for degradation
YDR451C	49.1374	-0.178683	0.455493	NA	49.1374	-0.466187	0.540102	0.999906	49.1374	0.287504	0.706535	0.999827	YHP1	One of two homeobox transcriptional repressors (see also Yox1p), that bind to Mcm1p and to early cell cycle box (ECB) elements of cell cycle regulated genes, thereby restricting ECB-mediated transcription to the M/G1 interval
YBR053C	79.5381	0.567632	0.402006	0.959028	79.5381	0.196827	0.541268	0.999906	79.5381	0.370806	0.674168	0.999827		Putative protein of unknown function; induced by cell wall perturbation
YOL076W	120.49	-0.157517	0.361361	0.992604	120.49	-0.586355	0.468876	0.999906	120.49	0.428839	0.591971	0.999827	MDM20	Non-catalytic subunit of the NatB N-terminal acetyltransferase, which catalyzes N-acetylation of proteins with specific N-terminal sequences; involved in mitochondrial inheritance and actin assembly
YDL138W	22.3967	-0.196816	0.615843	NA	22.3967	-0.850567	0.645459	0.999906	22.3967	0.653751	0.892138	0.999827	RGT2	Plasma membrane high glucose sensor that regulates glucose transport; contains 12 predicted transmembrane segments and a long C-terminal tail required for induction of hexose transporters; highly similar to Snf3p
YML131W	149.236	0.979445	0.379263	0.64828	149.236	0.867882	0.504659	0.999906	149.236	0.111563	0.631226	0.999827		Putative protein of unknown function with similarity to medium chain dehydrogenase/reductases; expression induced by stresses including osmotic shock, DNA damaging agents, and other chemicals; GFP-fusion protein localizes to the cytoplasm
YNL132W	401.09	0.100669	0.338436	0.992604	401.09	0.0336941	0.44803	0.999906	401.09	0.0669744	0.561488	0.999827	KRE33	Essential protein, required for biogenesis of the small ribosomal subunit; heterozygous mutant shows haploinsufficiency in K1 killer toxin resistance
YER155C	314.105	0.24861	0.28533	0.959028	314.105	0.0521039	0.373518	0.999906	314.105	0.196506	0.47003	0.999827	BEM2	Rho GTPase activating protein (RhoGAP) involved in the control of cytoskeleton organization and cellular morphogenesis; required for bud emergence
YJL051W	46.4566	-0.308264	0.520548	NA	46.4566	-1.29209	0.606925	0.999906	46.4566	0.983828	0.799603	0.999827	IRC8	Bud tip localized protein of unknown function; mRNA is targeted to the bud by a She2p dependent transport system; mRNA is cell cycle regulated via Fkh2p, peaking in G2/M phase; null mutant displays increased levels of spontaneous Rad52p foc
YGR276C	50.611	-0.324196	0.442031	NA	50.611	0.0320416	0.550708	0.999906	50.611	-0.356237	0.706162	0.999827	RNH70	3'-5' exoribonuclease; required for maturation of 3' ends of 5S rRNA and tRNA-Arg3 from dicistronic transcripts
YOL010W	69.7696	-0.384469	0.40397	0.959028	69.7696	-0.296147	0.513892	0.999906	69.7696	-0.0883213	0.653664	0.999827	RCL1	Subunit of U3-containing 90S preribosome processome complex involved in 18S rRNA biogenesis and small ribosomal subunit assembly; stimulates Bms1p GTPase and U3 binding activity; similar to RNA cyclase-like proteins but no activity detected
YHR158C	163.688	0.33706	0.316722	0.959028	163.688	0.16254	0.421757	0.999906	163.688	0.17452	0.52743	0.999827	KEL1	Protein required for proper cell fusion and cell morphology; functions in a complex with Kel2p to negatively regulate mitotic exit, interacts with Tem1p and Lte1p; localizes to regions of polarized growth; potential Cdc28p substrate
YBR035C	264.497	0.326261	0.326434	0.959028	264.497	0.481267	0.449506	0.999906	264.497	-0.155006	0.555523	0.999827	PDX3	Pyridoxine (pyridoxamine) phosphate oxidase, has homologs in E. coli and Myxococcus xanthus; transcription is under the general control of nitrogen metabolism
YNR039C	37.2719	0.326279	0.502754	NA	37.2719	-0.0690412	0.591414	0.999906	37.2719	0.39532	0.77621	0.999827	ZRG17	Endoplasmic reticulum protein of unknown function, transcription is induced under conditions of zinc deficiency; mutant phenotype suggests a role in uptake of zinc
YJL217W	74.4306	-0.20466	0.37229	0.984537	74.4306	-0.199785	0.504343	0.999906	74.4306	-0.00487476	0.626866	0.999827	REE1	Cytoplasmic protein involved in the regulation of enolase (ENO1); mRNA expression is induced by calcium shortage, copper deficiency (via Mac1p) and the presence of galactose (via Gal4p); mRNA expression is also regulated by the cell cycle
YFR031C	80.4731	-1.07322	0.386185	0.548192	80.4731	-0.499147	0.488421	0.999906	80.4731	-0.57407	0.622644	0.999827	SMC2	Subunit of the condensin complex; essential SMC chromosomal ATPase family member that forms a complex with Smc4p to form the active ATPase; Smc2p/Smc4p complex binds DNA; required for clustering of tRNA genes at the nucleolus
YOR038C	52.6282	0.0611152	0.452262	NA	52.6282	-0.187779	0.545233	0.999906	52.6282	0.248894	0.708388	0.999827	HIR2	Subunit of the HIR complex, a nucleosome assembly complex involved in regulation of histone gene transcription; recruits Swi-Snf complexes to histone gene promoters; promotes heterochromatic gene silencing with Asf1p
YJL172W	283.194	0.0558319	0.330345	0.992604	283.194	0.241823	0.450866	0.999906	283.194	-0.185992	0.558932	0.999827	CPS1	Vacuolar carboxypeptidase yscS; expression is induced under low-nitrogen conditions
YER111C	69.4034	0.321417	0.419689	0.962661	69.4034	0.260124	0.510991	0.999906	69.4034	0.0612935	0.661225	0.999827	SWI4	DNA binding component of the SBF complex (Swi4p-Swi6p), a transcriptional activator that in concert with MBF (Mbp1-Swi6p) regulates late G1-specific transcription of targets including cyclins and genes required for DNA synthesis and repair
YLR118C	69.5648	0.349616	0.41153	0.959028	69.5648	0.458113	0.533489	0.999906	69.5648	-0.108497	0.67373	0.999827		Acyl-protein thioesterase responsible for depalmitoylation of Gpa1p; green fluorescent protein (GFP)-fusion protein localizes to both the cytoplasm and nucleus and is induced in response to the DNA-damaging agent MMS
YML012W	525.419	0.146399	0.271199	0.986131	525.419	0.284232	0.378168	0.999906	525.419	-0.137832	0.465359	0.999827	ERV25	Protein that forms a heterotrimeric complex with Erp1, Erp2p, and Emp24, member of the p24 family involved in endoplasmic reticulum to Golgi transport
YKL216W	674.705	-0.0761183	0.631651	0.992604	674.705	0.0805174	0.640329	0.999906	674.705	-0.156636	0.899447	0.999827	URA1	Dihydroorotate dehydrogenase, catalyzes the fourth enzymatic step in the de novo biosynthesis of pyrimidines, converting dihydroorotic acid into orotic acid
YKL173W	86.6679	-0.337596	0.364149	0.959028	86.6679	-0.0297173	0.472504	0.999906	86.6679	-0.307879	0.596542	0.999827	SNU114	GTPase component of U5 snRNP involved in mRNA splicing via spliceosome; binds directly to U5 snRNA; proposed to be involved in conformational changes of the spliceosome; similarity to ribosomal translocation factor EF-2
YBR273C	80.3438	-0.511362	0.4419	0.959028	80.3438	0.160487	0.560175	0.999906	80.3438	-0.671849	0.713494	0.999827	UBX7	UBX (ubiquitin regulatory X) domain-containing protein that interacts with Cdc48p
YHR021C	366.047	0.488978	0.333854	0.959028	366.047	-0.0803855	0.444902	0.999906	366.047	0.569363	0.556233	0.999827	RPS27B	Protein component of the small (40S) ribosomal subunit; nearly identical to Rps27Ap and has similarity to rat S27 ribosomal protein
YDR264C	183.536	-0.0866527	0.322306	0.992604	183.536	0.179087	0.424826	0.999906	183.536	-0.265739	0.533249	0.999827	AKR1	Palmitoyl transferase involved in protein palmitoylation; acts as a negative regulator of pheromone response pathway; required for endocytosis of pheromone receptors; involved in cell shape control; contains ankyrin repeats
YKL027W	67.8966	-0.308106	0.414814	0.967178	67.8966	-0.722651	0.535571	0.999906	67.8966	0.414545	0.677431	0.999827		Protein of unknown function, localized to the mitochondrial outer membrane
YGR047C	72.87	-0.0918092	0.403719	0.992604	72.87	-0.262682	0.513197	0.999906	72.87	0.170873	0.652962	0.999827	TFC4	One of six subunits of the RNA polymerase III transcription initiation factor complex (TFIIIC); part of the TauA domain of TFIIIC that binds BoxA DNA promoter sites of tRNA and similar genes; has TPR motifs; human homolog is TFIIIC-102
YDR365C	206.992	-0.368475	0.333307	0.959028	206.992	0.0842369	0.443205	0.999906	206.992	-0.452712	0.554549	0.999827	ESF1	Nucleolar protein involved in pre-rRNA processing; depletion causes severely decreased 18S rRNA levels
YGR146C	27.1687	0.252317	0.578855	NA	27.1687	-0.139499	0.630245	0.999906	27.1687	0.391816	0.855712	0.999827	ECL1	Protein of unknown function, affects chronological lifespan; induced by iron homeostasis transcription factor Aft2p; multicopy suppressor of temperature sensitive hsf1 mutant; induced by treatment with 8-methoxypsoralen and UVA irradiation
YOR209C	211.158	-0.155251	0.305575	0.990703	211.158	0.386717	0.417315	0.999906	211.158	-0.541967	0.517228	0.999827	NPT1	Nicotinate phosphoribosyltransferase, acts in the salvage pathway of NAD+ biosynthesis; required for silencing at rDNA and telomeres and has a role in silencing at mating-type loci; localized to the nucleus
YER144C	31.9966	-0.18294	0.543029	NA	31.9966	-0.359302	0.616048	0.999906	31.9966	0.176361	0.821218	0.999827	UBP5	Putative ubiquitin-specific protease, closest paralog of Doa4p but has no functional overlap; concentrates at the bud neck
YKL126W	184.08	0.338368	0.31518	0.959028	184.08	0.111203	0.423075	0.999906	184.08	0.227165	0.527562	0.999827	YPK1	Serine/threonine protein kinase that phosphorylates and downregulates flippase activator Fpk1p; mutations affect receptor-mediated endocytosis and sphingolipid-mediated and cell integrity signaling pathways; homolog of mammalian kinase SGK
YOR281C	83.3456	-0.304255	0.378707	0.959028	83.3456	-0.0592004	0.497888	0.999906	83.3456	-0.245055	0.625547	0.999827	PLP2	Essential protein that interacts with the CCT (chaperonin containing TCP-1) complex to stimulate actin folding; has similarity to phosducins; null mutant lethality is complemented by mouse phosducin-like protein MgcPhLP
YIL124W	96.1978	0.557219	0.402306	0.959028	96.1978	0.290276	0.520787	0.999906	96.1978	0.266943	0.658039	0.999827	AYR1	NADPH-dependent 1-acyl dihydroxyacetone phosphate reductase found in lipid particles, ER, and mitochondrial outer membrane; involved in phosphatidic acid biosynthesis; required for spore germination; capable of metabolizing steroid hormones
YML065W	159.836	-0.898205	0.466672	0.89785	159.836	-0.106184	0.57835	0.999906	159.836	-0.79202	0.743151	0.999827	ORC1	Largest subunit of the origin recognition complex, which directs DNA replication by binding to replication origins and is also involved in transcriptional silencing; exhibits ATPase activity
YNL088W	528.273	0.127417	0.274343	0.992604	528.273	0.0603034	0.373953	0.999906	528.273	0.0671137	0.463793	0.999827	TOP2	Topoisomerase II, relieves torsional strain in DNA by cleaving and re-sealing the phosphodiester backbone of both positively and negatively supercoiled DNA; cleaves complementary strands; localizes to axial cores in meiosis
Q0075	66.0504	-0.661836	0.544484	0.959028	66.0504	0.232815	0.60377	0.999906	66.0504	-0.894651	0.813026	0.999827	AI5_BETA	Protein of unknown function, encoded within an intron of the mitochondrial COX1 gene; translational initiation codon is predicted to be ATA rather than ATG
YPL183C	147.87	-0.330532	0.335027	0.959028	147.87	0.0475182	0.437925	0.999906	147.87	-0.37805	0.551381	0.999827	RTT10	Cytoplasmic protein with a role in regulation of Ty1 transposition
YNL189W	424.344	0.0236144	0.292546	0.992604	424.344	0.193067	0.399135	0.999906	424.344	-0.169453	0.494865	0.999827	SRP1	Karyopherin alpha homolog, forms a dimer with karyopherin beta Kap95p to mediate import of nuclear proteins, binds the nuclear localization signal of the substrate during import; may also play a role in regulation of protein degradation
YLR228C	69.4594	0.12153	0.405598	0.992604	69.4594	0.0487923	0.499502	0.999906	69.4594	0.072738	0.64343	0.999827	ECM22	Sterol regulatory element binding protein, regulates transcription of sterol biosynthetic genes; contains Zn
YPL082C	169.974	-0.254462	0.370743	0.967178	169.974	-0.0497599	0.468275	0.999906	169.974	-0.204702	0.59727	0.999827	MOT1	Essential abundant protein involved in regulation of transcription, removes Spt15p (TBP) from DNA via its C-terminal ATPase activity, forms a complex with TBP that binds TATA DNA with high affinity but with altered specificity
YGR245C	429.586	-0.598235	0.311064	0.89785	429.586	-0.394325	0.41439	0.999906	429.586	-0.20391	0.518151	0.999827	SDA1	Highly conserved nuclear protein required for actin cytoskeleton organization and passage through Start, plays a critical role in G1 events, binds Nap1p, also involved in 60S ribosome biogenesis
YBR060C	39.291	0.228453	0.469033	NA	39.291	-0.0721016	0.558915	0.999906	39.291	0.300555	0.729623	0.999827	ORC2	Subunit of the origin recognition complex, which directs DNA replication by binding to replication origins and is also involved in transcriptional silencing; interacts with Spp1p and with trimethylated histone H3; phosphorylated by Cdc28p
YNL101W	40.2606	0.651956	0.484247	NA	40.2606	0.304486	0.562364	0.999906	40.2606	0.34747	0.742026	0.999827	AVT4	Vacuolar transporter, exports large neutral amino acids from the vacuole; member of a family of seven S. cerevisiae genes (AVT1-7) related to vesicular GABA-glycine transporters
YMR116C	4987.23	0.214757	0.254697	0.959028	4987.23	0.126907	0.347288	0.999906	4987.23	0.0878502	0.430673	0.999827	ASC1	G-protein beta subunit and guanine nucleotide dissociation inhibitor for Gpa2p; ortholog of RACK1 that inhibits translation; core component of the small (40S) ribosomal subunit; represses Gcn4p in the absence of amino acid starvation
YFL008W	155.201	0.122409	0.359165	0.992604	155.201	-0.112307	0.467906	0.999906	155.201	0.234715	0.589859	0.999827	SMC1	Subunit of the multiprotein cohesin complex, essential protein involved in chromosome segregation and in double-strand DNA break repair; SMC chromosomal ATPase family member, binds DNA with a preference for DNA with secondary structure
YER089C	228.578	0.0567652	0.309515	0.992604	228.578	0.0888913	0.41206	0.999906	228.578	-0.032126	0.515355	0.999827	PTC2	Type 2C protein phosphatase (PP2C); dephosphorylates Hog1p to limit maximal osmostress induced kinase activity; dephosphorylates Ire1p to downregulate the unfolded protein response; dephosphorylates Cdc28p; inactivates the DNA checkpoint
YDL208W	113.667	-0.422428	0.372539	0.959028	113.667	-0.15832	0.485959	0.999906	113.667	-0.264109	0.612324	0.999827	NHP2	Nuclear protein related to mammalian high mobility group (HMG) proteins, essential for function of H/ACA-type snoRNPs, which are involved in 18S rRNA processing
YGR065C	61.5029	0.0679135	0.421548	NA	61.5029	-0.296338	0.527237	0.999906	61.5029	0.364251	0.675043	0.999827	VHT1	High-affinity plasma membrane H+-biotin (vitamin H) symporter; mutation results in fatty acid auxotrophy; 12 transmembrane domain containing major facilitator subfamily member; mRNA levels negatively regulated by iron deprivation and biotin
YNL220W	296.839	0.0606281	0.306729	0.992604	296.839	0.202724	0.422533	0.999906	296.839	-0.142096	0.522125	0.999827	ADE12	Adenylosuccinate synthase, catalyzes the first step in synthesis of adenosine monophosphate from inosine 5'monophosphate during purine nucleotide biosynthesis; exhibits binding to single-stranded autonomously replicating (ARS) core sequence
YGR267C	75.8221	-0.171491	0.37825	0.992604	75.8221	0.514182	0.504841	0.999906	75.8221	-0.685673	0.630805	0.999827	FOL2	GTP-cyclohydrolase I, catalyzes the first step in the folic acid biosynthetic pathway
YBR143C	476.088	-0.126204	0.266625	0.992604	476.088	-0.00222612	0.366752	0.999906	476.088	-0.123978	0.453427	0.999827	SUP45	Polypeptide release factor (eRF1) in translation termination; mutant form acts as a recessive omnipotent suppressor; methylated by Mtq2p-Trm112p in ternary complex eRF1-eRF3-GTP; mutation of methylation site confers resistance to zymocin
YNL321W	119.258	0.37202	0.355359	0.959028	119.258	0.258745	0.460889	0.999906	119.258	0.113275	0.581963	0.999827	VNX1	Calcium/H+ antiporter localized to the endoplasmic reticulum membrane; member of the calcium exchanger (CAX) family; potential Cdc28p substrate
YNL123W	258.42	-0.222288	0.288691	0.962168	258.42	0.0679747	0.392018	0.999906	258.42	-0.290263	0.486847	0.999827	NMA111	Serine protease and general molecular chaperone; involved in response to heat stress and promotion of apoptosis; may contribute to lipid homeostasis; sequence similarity to the mammalian Omi/HtrA2 family of serine proteases
YHR149C	63.2043	0.225937	0.482034	NA	63.2043	0.390461	0.576086	0.999906	63.2043	-0.164524	0.751137	0.999827	SKG6	Integral membrane protein that localizes primarily to growing sites such as the bud tip or the cell periphery; potential Cdc28p substrate; Skg6p interacts with Zds1p and Zds2p
YOL100W	34.6767	0.221585	0.506019	NA	34.6767	-0.259283	0.573454	0.999906	34.6767	0.480868	0.764788	0.999827	PKH2	Serine/threonine protein kinase involved in sphingolipid-mediated signaling pathway that controls endocytosis; activates Ypk1p and Ykr2p, components of signaling cascade required for maintenance of cell wall integrity; redundant with Pkh1p
YJL026W	1483.11	-0.111102	0.332353	0.992604	1483.11	0.358083	0.445095	0.999906	1483.11	-0.469185	0.555489	0.999827	RNR2	Ribonucleotide-diphosphate reductase (RNR), small subunit; the RNR complex catalyzes the rate-limiting step in dNTP synthesis and is regulated by DNA replication and DNA damage checkpoint pathways via localization of the small subunits
YPR189W	217.46	0.0810152	0.309998	0.992604	217.46	-0.00903205	0.416667	0.999906	217.46	0.0900473	0.519334	0.999827	SKI3	Ski complex component and TPR protein, mediates 3'-5' RNA degradation by the cytoplasmic exosome; null mutants have superkiller phenotype of increased viral dsRNAs and are synthetic lethal with mutations in 5'-3' mRNA decay
YIL142W	506.496	-0.0537954	0.26728	0.992604	506.496	0.166335	0.367879	0.999906	506.496	-0.22013	0.454723	0.999827	CCT2	Subunit beta of the cytosolic chaperonin Cct ring complex, related to Tcp1p, required for the assembly of actin and tubulins in vivo
YER122C	194.57	0.545539	0.343226	0.959028	194.57	-0.00658675	0.448148	0.999906	194.57	0.552126	0.564479	0.999827	GLO3	ADP-ribosylation factor GTPase activating protein (ARF GAP), involved in ER-Golgi transport; shares functional similarity with Gcs1p
YDR303C	74.9661	0.224938	0.387519	0.982129	74.9661	0.0977271	0.491764	0.999906	74.9661	0.127211	0.626085	0.999827	RSC3	Component of the RSC chromatin remodeling complex; essential gene required for maintenance of proper ploidy and regulation of ribosomal protein genes and the cell wall/stress response; highly similar to Rsc30p
YMR229C	957.302	-0.26267	0.258518	0.959028	957.302	-0.16164	0.351591	0.999906	957.302	-0.10103	0.436403	0.999827	RRP5	RNA binding protein with preference for single stranded tracts of U's involved in synthesis of both 18S and 5.8S rRNAs; component of both the ribosomal small subunit (SSU) processosome and the 90S preribosome
YKL207W	156.136	0.413598	0.328787	0.959028	156.136	0.338813	0.457549	0.999906	156.136	0.0747857	0.563409	0.999827	AIM27	Member of a transmembrane complex required for efficient folding of proteins in the ER; required for respiratory growth; null mutant displays induction of the unfolded protein response
YOR128C	112.961	0.116594	0.389976	0.992604	112.961	-0.585185	0.505745	0.999906	112.961	0.70178	0.638643	0.999827	ADE2	Phosphoribosylaminoimidazole carboxylase, catalyzes a step in the 'de novo' purine nucleotide biosynthetic pathway; red pigment accumulates in mutant cells deprived of adenine
YGR223C	34.7792	0.267879	0.489077	NA	34.7792	0.44499	0.57755	0.999906	34.7792	-0.177111	0.756714	0.999827	HSV2	Phosphatidylinositol 3,5-bisphosphate-binding protein, plays a role in micronucleophagy; predicted to fold as a seven-bladed beta-propeller; displays punctate cytoplasmic localization
YNL066W	189.791	-0.600176	0.312529	0.89785	189.791	-0.4697	0.418678	0.999906	189.791	-0.130476	0.522461	0.999827	SUN4	Cell wall protein related to glucanases, possibly involved in cell wall septation; member of the SUN family
YJL062W	108.405	0.0340466	0.350065	0.992604	108.405	0.179647	0.465653	0.999906	108.405	-0.1456	0.582551	0.999827	LAS21	Integral plasma membrane protein involved in the synthesis of the glycosylphosphatidylinositol (GPI) core structure; mutations affect cell wall integrity
YDR101C	211.891	0.0105125	0.373009	0.996693	211.891	-0.354021	0.488121	0.999906	211.891	0.364533	0.614327	0.999827	ARX1	Shuttling pre-60S factor; involved in the biogenesis of ribosomal large subunit biogenesis; interacts directly with Alb1; responsible for Tif6 recycling defects in absence of Rei1; associated with the ribosomal export complex
YPR145W	1267.07	0.564589	0.267812	0.829774	1267.07	0.511511	0.365424	0.999906	1267.07	0.0530789	0.453053	0.999827	ASN1	Asparagine synthetase, isozyme of Asn2p; catalyzes the synthesis of L-asparagine from L-aspartate in the asparagine biosynthetic pathway
YML102W	54.9188	0.146611	0.43121	NA	54.9188	0.184445	0.53521	0.999906	54.9188	-0.0378339	0.68729	0.999827	CAC2	Component of the chromatin assembly complex (with Rlf2p and Msi1p) that assembles newly synthesized histones onto recently replicated DNA, required for building functional kinetochores, conserved from yeast to humans
YLR181C	59.3889	-0.41757	0.425104	NA	59.3889	-0.150967	0.533377	0.999906	59.3889	-0.266603	0.682059	0.999827	VTA1	Multivesicular body (MVB) protein involved in endosomal protein sorting; regulates Vps4p activity by promoting its oligomerization; has an N-terminal Vps60- and Did2- binding domain, a linker region, and a C-terminal Vps4p binding domain
YOL045W	83.4833	-0.0917613	0.374176	0.992604	83.4833	0.10897	0.476662	0.999906	83.4833	-0.200731	0.605976	0.999827	PSK2	One of two (see also PSK1) PAS domain containing S/T protein kinases; regulates sugar flux and translation in response to an unknown metabolite by phosphorylating Ugp1p and Gsy2p (sugar flux) and Caf20p, Tif11p and Sro9p (translation)
YDR505C	76.064	0.0163959	0.423195	0.995571	76.064	0.43159	0.520311	0.999906	76.064	-0.415194	0.670665	0.999827	PSP1	Asn and gln rich protein of unknown function; high-copy suppressor of POL1 (DNA polymerase alpha) and partial suppressor of CDC2 (polymerase delta) and CDC6 (pre-RC loading factor) mutations; overexpression results in growth inhibition
YOL144W	86.3717	-0.624024	0.396874	0.959028	86.3717	-0.127611	0.525229	0.999906	86.3717	-0.496413	0.658313	0.999827	NOP8	Nucleolar protein required for 60S ribosomal subunit biogenesis
YKL140W	72.9628	0.312262	0.399814	0.959028	72.9628	0.0784587	0.50791	0.999906	72.9628	0.233804	0.646372	0.999827	TGL1	Steryl ester hydrolase, one of three gene products (Yeh1p, Yeh2p, Tgl1p) responsible for steryl ester hydrolase activity and involved in sterol homeostasis; localized to lipid particle membranes
YCR012W	11994.9	0.425629	0.278656	0.959028	11994.9	0.308424	0.376573	0.999906	11994.9	0.117205	0.468462	0.999827	PGK1	3-phosphoglycerate kinase, catalyzes transfer of high-energy phosphoryl groups from the acyl phosphate of 1,3-bisphosphoglycerate to ADP to produce ATP; key enzyme in glycolysis and gluconeogenesis
YDR334W	109.636	-0.291918	0.374803	0.959028	109.636	0.287005	0.4584	0.999906	109.636	-0.578923	0.592118	0.999827	SWR1	Swi2/Snf2-related ATPase that is the structural component of the SWR1 complex, which exchanges histone variant H2AZ (Htz1p) for chromatin-bound histone H2A
YNL037C	279.074	-0.176178	0.395592	0.992604	279.074	-0.258441	0.515235	0.999906	279.074	0.0822625	0.649585	0.999827	IDH1	Subunit of mitochondrial NAD(+)-dependent isocitrate dehydrogenase, which catalyzes the oxidation of isocitrate to alpha-ketoglutarate in the TCA cycle
YJL110C	49.2428	-0.757681	0.462219	NA	49.2428	0.219962	0.538213	0.999906	49.2428	-0.977643	0.709469	0.999827	GZF3	GATA zinc finger protein and Dal80p homolog that negatively regulates nitrogen catabolic gene expression by competing with Gat1p for GATA site binding; function requires a repressive carbon source; dimerizes with Dal80p and binds to Tor1p
YLR344W	852.152	-0.077493	0.311904	0.992604	852.152	0.103698	0.41728	0.999906	852.152	-0.181191	0.520967	0.999827	RPL26A	Protein component of the large (60S) ribosomal subunit, nearly identical to Rpl26Bp and has similarity to E. coli L24 and rat L26 ribosomal proteins; binds to 5.8S rRNA
YIL074C	112.082	0.41296	0.366479	0.959028	112.082	-0.488426	0.478157	0.999906	112.082	0.901386	0.602454	0.999827	SER33	3-phosphoglycerate dehydrogenase, catalyzes the first step in serine and glycine biosynthesis; isozyme of Ser3p
YOR294W	105.176	-0.25693	0.398645	0.970619	105.176	-0.0611238	0.52203	0.999906	105.176	-0.195806	0.656834	0.999827	RRS1	Essential protein that binds ribosomal protein L11 and is required for nuclear export of the 60S pre-ribosomal subunit during ribosome biogenesis; mouse homolog shows altered expression in Huntington's disease model mice
YLR419W	151.859	0.0332218	0.315738	0.992604	151.859	0.333328	0.415736	0.999906	151.859	-0.300106	0.522036	0.999827		Putative helicase with limited sequence similarity to human Rb protein; the authentic, non-tagged protein is detected in highly purified mitochondria in high-throughput studies; YLR419W is not an essential gene
YJR138W	81.8599	-0.20574	0.398507	0.987757	81.8599	0.0249676	0.501198	0.999906	81.8599	-0.230707	0.640314	0.999827	IML1	Protein of unknown function, green fluorescent protein (GFP)-fusion protein localizes to the vacuolar membrane
YJL154C	148.05	0.0269023	0.346963	0.992604	148.05	-0.104417	0.445799	0.999906	148.05	0.131319	0.564905	0.999827	VPS35	Endosomal subunit of membrane-associated retromer complex required for retrograde transport; receptor that recognizes retrieval signals on cargo proteins, forms subcomplex with Vps26p and Vps29p that selects cargo proteins for retrieval
YNL271C	254.563	-0.0702306	0.342131	0.992604	254.563	0.0897061	0.444124	0.999906	254.563	-0.159937	0.560624	0.999827	BNI1	Formin, nucleates the formation of linear actin filaments, involved in cell processes such as budding and mitotic spindle orientation which require the formation of polarized actin cables, functionally redundant with BNR1
YKL032C	74.0381	-0.0680211	0.390179	0.992604	74.0381	-0.235406	0.486679	0.999906	74.0381	0.167385	0.623775	0.999827	IXR1	Protein that binds DNA containing intrastrand cross-links formed by cisplatin, contains two HMG (high mobility group box) domains, which confer the ability to bend cisplatin-modified DNA; mediates aerobic transcriptional repression of COX5b
YGR135W	256.704	-0.0661356	0.292469	0.992604	256.704	-0.112587	0.404018	0.999906	256.704	0.0464511	0.498766	0.999827	PRE9	Alpha 3 subunit of the 20S proteasome, the only nonessential 20S subunit; may be replaced by the alpha 4 subunit (Pre6p) under stress conditions to create a more active proteasomal isoform
YER173W	28.8578	-1.08136	0.541458	NA	28.8578	-0.0541627	0.614424	0.999906	28.8578	-1.02719	0.818979	0.999827	RAD24	Checkpoint protein, involved in the activation of the DNA damage and meiotic pachytene checkpoints; subunit of a clamp loader that loads Rad17p-Mec3p-Ddc1p onto DNA; homolog of human and S. pombe Rad17 protein
YMR058W	1183.66	-0.428	0.311609	0.959028	1183.66	-0.41907	0.416097	0.999906	1183.66	-0.00892983	0.519843	0.999827	FET3	Ferro-O2-oxidoreductase required for high-affinity iron uptake and involved in mediating resistance to copper ion toxicity, belongs to class of integral membrane multicopper oxidases
YDR172W	759.029	-0.186339	0.255431	0.967178	759.029	-0.127381	0.352055	0.999906	759.029	-0.0589579	0.434957	0.999827	SUP35	Translation termination factor eRF3; altered protein conformation creates the
YIL030C	222.824	0.0508172	0.33197	0.992604	222.824	0.168302	0.43463	0.999906	222.824	-0.117484	0.546905	0.999827	SSM4	Ubiquitin-protein ligase involved in ER-associated protein degradation; located in the ER/nuclear envelope; ssm4 mutation suppresses mRNA instability caused by an rna14 mutation
YBL091C	269.316	0.187925	0.314387	0.979138	269.316	0.244777	0.431074	0.999906	269.316	-0.0568526	0.533535	0.999827	MAP2	Methionine aminopeptidase, catalyzes the cotranslational removal of N-terminal methionine from nascent polypeptides; function is partially redundant with that of Map1p
YMR278W	130.986	-0.0116952	0.353019	0.996693	130.986	-0.127191	0.462355	0.999906	130.986	0.115496	0.581715	0.999827	PGM3	Phosphoglucomutase, catalyzes interconversion of glucose-1-phosphate and glucose-6-phospate; transcription induced in response to stress; green fluorescent protein (GFP)-fusion protein localizes to the cytoplasm and nucleus; non-essential
YKL054C	441.938	-0.0181657	0.291197	0.992952	441.938	-0.0406687	0.392131	0.999906	441.938	0.0225029	0.488428	0.999827	DEF1	RNAPII degradation factor, forms a complex with Rad26p in chromatin, enables ubiquitination and proteolysis of RNAPII present in an elongation complex; mutant is deficient in Zip1p loading onto chromosomes during meiosis
YER072W	168.912	0.255101	0.31019	0.959028	168.912	-0.158146	0.440902	0.999906	168.912	0.413247	0.539082	0.999827	VTC1	Subunit of the vacuolar transporter chaperone (VTC) complex involved in membrane trafficking, vacuolar polyphosphate accumulation, microautophagy and non-autophagic vacuolar fusion; also has mRNA binding activity
YDR037W	1507.73	0.19264	0.271911	0.967178	1507.73	-0.0586792	0.37073	0.999906	1507.73	0.251319	0.459757	0.999827	KRS1	Lysyl-tRNA synthetase
YDR510W	180.885	0.431402	0.357553	0.959028	180.885	-0.0183783	0.470409	0.999906	180.885	0.449781	0.590867	0.999827	SMT3	Ubiquitin-like protein of the SUMO family, conjugated to lysine residues of target proteins; regulates chromatid cohesion, chromosome segregation, APC-mediated proteolysis, DNA replication and septin ring dynamics; phosphorylated at Ser2
YOR359W	37.2015	-0.411894	0.498621	NA	37.2015	-0.362236	0.582291	0.999906	37.2015	-0.0496577	0.766607	0.999827	VTS1	Post-transcriptional gene regulator, flap-structured DNA-binding and RNA-binding protein; shows genetic interactions with Vti1p, a v-SNARE involved in cis-Golgi membrane traffic; stimulates Dna2p endonuclease activity; contains a SAM domain
YOR197W	167.238	0.214996	0.319406	0.967178	167.238	0.403026	0.431426	0.999906	167.238	-0.18803	0.536784	0.999827	MCA1	Putative cysteine protease similar to mammalian caspases; involved in regulation of apoptosis upon hydrogen peroxide treatment; proposed to be involved in cell cycle progression
YMR195W	43.5235	-1.43149	0.573418	NA	43.5235	-0.0730208	0.63742	0.999906	43.5235	-1.35847	0.857408	0.999827	ICY1	Protein of unknown function, required for viability in rich media of cells lacking mitochondrial DNA; mutants have an invasive growth defect with elongated morphology; induced by amino acid starvation
YHR190W	371.995	0.0261362	0.295174	0.992604	371.995	0.0579209	0.409012	0.999906	371.995	-0.0317847	0.504398	0.999827	ERG9	Farnesyl-diphosphate farnesyl transferase (squalene synthase), joins two farnesyl pyrophosphate moieties to form squalene in the sterol biosynthesis pathway
YJL176C	81.3759	-0.213434	0.383648	0.982129	81.3759	-0.398805	0.482773	0.999906	81.3759	0.185371	0.61665	0.999827	SWI3	Subunit of the SWI/SNF chromatin remodeling complex, which regulates transcription by remodeling chromosomes; required for transcription of many genes, including ADH1, ADH2, GAL1, HO, INO1 and SUC2
YML016C	91.0115	-0.00784671	0.389422	0.996693	91.0115	0.0860197	0.492303	0.999906	91.0115	-0.0938664	0.627698	0.999827	PPZ1	Serine/threonine protein phosphatase Z, isoform of Ppz2p; involved in regulation of potassium transport, which affects osmotic stability, cell cycle progression, and halotolerance
YJR039W	30.7751	-0.0315176	0.522933	NA	30.7751	-0.317386	0.597059	0.999906	30.7751	0.285869	0.793689	0.999827		Putative protein of unknown function; the authentic, non-tagged protein is detected in highly purified mitochondria in high-throughput studies
YBR031W	5270.99	-0.221332	0.28121	0.959028	5270.99	-0.0126268	0.379582	0.999906	5270.99	-0.208705	0.4724	0.999827	RPL4A	N-terminally acetylated protein component of the large (60S) ribosomal subunit, nearly identical to Rpl4Bp and has similarity to E. coli L4 and rat L4 ribosomal proteins
YGL094C	95.3193	-0.130445	0.400533	0.992604	95.3193	0.108631	0.495052	0.999906	95.3193	-0.239077	0.636786	0.999827	PAN2	Essential subunit of the Pan2p-Pan3p poly(A)-ribonuclease complex, which acts to control poly(A) tail length and regulate the stoichiometry and activity of postreplication repair complexes
YKL010C	288.748	0.0249196	0.289441	0.992604	288.748	0.156941	0.394891	0.999906	288.748	-0.132021	0.489605	0.999827	UFD4	Ubiquitin-protein ligase (E3) that interacts with Rpt4p and Rpt6p, two subunits of the 19S particle of the 26S proteasome; cytoplasmic E3 involved in the degradation of ubiquitin fusion proteins
YPR037C	83.7063	-0.373065	0.415405	0.959028	83.7063	-0.0556722	0.541724	0.999906	83.7063	-0.317393	0.68266	0.999827	ERV2	Flavin-linked sulfhydryl oxidase localized to the endoplasmic reticulum lumen, involved in disulfide bond formation within the ER
YPL178W	76.3716	-0.309824	0.379337	0.959028	76.3716	0.239856	0.500338	0.999906	76.3716	-0.54968	0.627874	0.999827	CBC2	Small subunit of the heterodimeric cap binding complex that also contains Sto1p, component of the spliceosomal commitment complex; interacts with Npl3p, possibly to package mRNA for export from the nucleus; contains an RNA-binding motif
YOR078W	53.6865	-0.832693	0.467869	NA	53.6865	-0.110417	0.564607	0.999906	53.6865	-0.722276	0.733272	0.999827	BUD21	Component of small ribosomal subunit (SSU) processosome that contains U3 snoRNA; originally isolated as bud-site selection mutant that displays a random budding pattern
YDR150W	489.803	-0.393331	0.334511	0.959028	489.803	-0.0570703	0.441083	0.999906	489.803	-0.336261	0.553581	0.999827	NUM1	Protein required for nuclear migration, localizes to the mother cell cortex and the bud tip; may mediate interactions of dynein and cytoplasmic microtubules with the cell cortex
YDR477W	156.827	0.280801	0.317909	0.959028	156.827	-0.268979	0.423003	0.999906	156.827	0.54978	0.529148	0.999827	SNF1	AMP-activated serine/threonine protein kinase found in a complex containing Snf4p and members of the Sip1p/Sip2p/Gal83p family; required for transcription of glucose-repressed genes, thermotolerance, sporulation, and peroxisome biogenesis
YGR070W	53.7388	-0.744874	0.503102	NA	53.7388	0.0429547	0.563969	0.999906	53.7388	-0.787829	0.755773	0.999827	ROM1	GDP/GTP exchange protein (GEP) for Rho1p; mutations are synthetically lethal with mutations in rom2, which also encodes a GEP
YIL131C	86.0805	0.0126256	0.419011	0.996693	86.0805	-0.749244	0.530184	0.999906	86.0805	0.761869	0.675778	0.999827	FKH1	Forkhead family transcription factor with a minor role in the expression of G2/M phase genes; negatively regulates transcriptional elongation; positive role in chromatin silencing at HML and HMR; regulates donor preference during switching
YDL097C	229.685	0.393024	0.316909	0.959028	229.685	0.100979	0.428505	0.999906	229.685	0.292045	0.532956	0.999827	RPN6	Essential, non-ATPase regulatory subunit of the 26S proteasome lid required for the assembly and activity of the 26S proteasome; the human homolog (S9 protein) partially rescues Rpn6p depletion
YGR118W	1352.73	-0.0755489	0.247403	0.992604	1352.73	-0.288777	0.340867	0.999906	1352.73	0.213228	0.421187	0.999827	RPS23A	Ribosomal protein 28 (rp28) of the small (40S) ribosomal subunit, required for translational accuracy; nearly identical to Rps23Bp and similar to E. coli S12 and rat S23 ribosomal proteins; deletion of both RPS23A and RPS23B is lethal
YOL063C	51.2186	0.382048	0.444882	NA	51.2186	-0.194204	0.526593	0.999906	51.2186	0.576253	0.689354	0.999827	CRT10	Protein involved in transcriptional regulation of RNR2 and RNR3; expression of the gene is induced by DNA damage and null mutations confer increased resistance to hydroxyurea; N-terminal region has a leucine repeat and a WD40 repeat
YER005W	37.331	-0.829797	0.492789	NA	37.331	-0.596343	0.56528	0.999906	37.331	-0.233454	0.749904	0.999827	YND1	Apyrase with wide substrate specificity, involved in preventing the inhibition of glycosylation by hydrolyzing nucleoside tri- and diphosphates which are inhibitors of glycotransferases; partially redundant with Gda1p
YGR007W	77.9032	-0.41302	0.388197	0.959028	77.9032	-0.194902	0.498916	0.999906	77.9032	-0.218118	0.63215	0.999827	ECT1	Ethanolamine-phosphate cytidylyltransferase, catalyzes the second step of phosphatidylethanolamine biosynthesis; involved in the maintenance of plasma membrane; similar to mammalian CTP: phosphocholine cytidylyl-transferases
YDR325W	87.5136	0.366394	0.39846	0.959028	87.5136	-0.135014	0.499671	0.999906	87.5136	0.501408	0.639089	0.999827	YCG1	Subunit of the condensin complex; required for establishment and maintenance of chromosome condensation, chromosome segregation and chromatin binding of the condensin complex; required for clustering of tRNA genes at the nucleolus
YDR127W	963.868	0.352869	0.269618	0.959028	963.868	0.479533	0.367921	0.999906	963.868	-0.126664	0.456135	0.999827	ARO1	Pentafunctional arom protein, catalyzes steps 2 through 6 in the biosynthesis of chorismate, which is a precursor to aromatic amino acids
YKL166C	36.6309	-0.204192	0.461264	NA	36.6309	-0.240127	0.562699	0.999906	36.6309	0.0359351	0.727594	0.999827	TPK3	cAMP-dependent protein kinase catalytic subunit; promotes vegetative growth in response to nutrients via the Ras-cAMP signaling pathway; partially redundant with Tpk1p and Tpk2p; localizes to P-bodies during stationary phase
YMR184W	53.7737	0.232301	0.430389	NA	53.7737	0.573041	0.545733	0.999906	53.7737	-0.34074	0.694971	0.999827	ADD37	Protein of unknown function involved in ER-associated protein degradation; green fluorescent protein (GFP)-fusion protein localizes to the cytoplasm and is induced in response to the DNA-damaging agent MMS; YMR184W is not an essential gene
YOR087W	69.9743	-0.00138806	0.4088	1	69.9743	0.337664	0.520253	0.999906	69.9743	-0.339052	0.661624	0.999827	YVC1	Vacuolar cation channel, mediates release of Ca(2+) from the vacuole in response to hyperosmotic shock
YML061C	60.704	0.334155	0.469783	NA	60.704	-0.00077894	0.57033	0.999906	60.704	0.334934	0.73889	0.999827	PIF1	DNA helicase; exists in a nuclear form that acts as a catalytic inhibitor of telomerase; and as a mitochondrial form involved in repair and recombination of mitochondrial DNA; mutations affect zinc and iron homeostasis
YJL101C	219.465	0.526279	0.339176	0.959028	219.465	0.501919	0.445832	0.999906	219.465	0.0243607	0.56017	0.999827	GSH1	Gamma glutamylcysteine synthetase catalyzes the first step in glutathione (GSH) biosynthesis; expression induced by oxidants, cadmium, and mercury
YPR163C	966.019	-0.452653	0.305359	0.959028	966.019	0.0268303	0.410872	0.999906	966.019	-0.479484	0.511918	0.999827	TIF3	Translation initiation factor eIF-4B, has RNA annealing activity; contains an RNA recognition motif and binds to single-stranded RNA
YFL048C	105.593	0.436106	0.343413	0.959028	105.593	-0.174108	0.454887	0.999906	105.593	0.610213	0.569955	0.999827	EMP47	Integral membrane component of endoplasmic reticulum-derived COPII-coated vesicles, which function in ER to Golgi transport
YMR122W-A	138.274	0.469471	0.396478	0.959028	138.274	0.0967045	0.506907	0.999906	138.274	0.372766	0.643539	0.999827		Protein of unknown function; green fluorescent protein (GFP)-fusion protein localizes to the cytoplasm and endoplasmic reticulum
YJL044C	50.0867	-0.0428567	0.503182	NA	50.0867	-0.477362	0.597858	0.999906	50.0867	0.434505	0.781431	0.999827	GYP6	GTPase-activating protein (GAP) for the yeast Rab family member, Ypt6p; involved in vesicle mediated protein transport
YNL206C	72.0852	-0.0568339	0.381509	0.992604	72.0852	0.103135	0.490702	0.999906	72.0852	-0.159969	0.621552	0.999827	RTT106	Histone chaperone, involved in regulation of chromatin structure in both transcribed and silenced chromosomal regions; affects transcriptional elongation; has a role in regulation of Ty1 transposition
YNL307C	186.667	0.14147	0.37759	0.992604	186.667	0.00348394	0.498867	0.999906	186.667	0.137986	0.625651	0.999827	MCK1	Protein serine/threonine/tyrosine (dual-specificity) kinase involved in control of chromosome segregation and in regulating entry into meiosis; related to mammalian glycogen synthase kinases of the GSK-3 family
YOL027C	198.344	0.381081	0.325719	0.959028	198.344	0.239208	0.435141	0.999906	198.344	0.141873	0.543538	0.999827	MDM38	Mitochondrial inner membrane protein, involved in membrane integration of a subset of mitochondrial proteins; required for K+/H+ exchange; associates with mitochondrial ribosomes; human ortholog Letm1 implicated in Wolf-Hirschhorn syndrome
YLR369W	54.4765	0.128031	0.453667	NA	54.4765	-0.375738	0.557665	0.999906	54.4765	0.503769	0.718894	0.999827	SSQ1	Mitochondrial hsp70-type molecular chaperone, required for assembly of iron/sulfur clusters into proteins at a step after cluster synthesis, and for maturation of Yfh1p, which is a homolog of human frataxin implicated in Friedreich's ataxia
YDR466W	38.7664	0.352279	0.489824	NA	38.7664	-0.059004	0.565508	0.999906	38.7664	0.411283	0.748121	0.999827	PKH3	Protein kinase with similarity to mammalian phosphoinositide-dependent kinase 1 (PDK1) and yeast Pkh1p and Pkh2p, two redundant upstream activators of Pkc1p; identified as a multicopy suppressor of a pkh1 pkh2 double mutant
YDR062W	243.126	0.319004	0.301249	0.959028	243.126	0.167307	0.405463	0.999906	243.126	0.151697	0.50512	0.999827	LCB2	Component of serine palmitoyltransferase, responsible along with Lcb1p for the first committed step in sphingolipid synthesis, which is the condensation of serine with palmitoyl-CoA to form 3-ketosphinganine
YLR268W	39.8518	-0.279583	0.463282	NA	39.8518	-0.0426653	0.567344	0.999906	39.8518	-0.236918	0.732463	0.999827	SEC22	R-SNARE protein; assembles into SNARE complex with Bet1p, Bos1p and Sed5p; cycles between the ER and Golgi complex; involved in anterograde and retrograde transport between the ER and Golgi; synaptobrevin homolog
YAL029C	221.664	-0.116655	0.33783	0.992604	221.664	0.0863933	0.439529	0.999906	221.664	-0.203048	0.554358	0.999827	MYO4	One of two type V myosin motors (along with MYO2) involved in actin-based transport of cargos; required for mRNA transport, including ASH1 mRNA, and facilitating the growth and movement of ER tubules into the growing bud along with She3p
YOL126C	199.815	0.290911	0.410567	0.967178	199.815	0.0354822	0.532349	0.999906	199.815	0.255429	0.672274	0.999827	MDH2	Cytoplasmic malate dehydrogenase, one of three isozymes that catalyze interconversion of malate and oxaloacetate; involved in the glyoxylate cycle and gluconeogenesis during growth on two-carbon compounds; interacts with Pck1p and Fbp1
YGL049C	237.294	-0.297425	0.314205	0.959028	237.294	-0.0229929	0.421508	0.999906	237.294	-0.274432	0.525731	0.999827	TIF4632	Translation initiation factor eIF4G, subunit of the mRNA cap-binding protein complex (eIF4F) that also contains eIF4E (Cdc33p); associates with the poly(A)-binding protein Pab1p, also interacts with eIF4A (Tif1p); homologous to Tif4631p
[truncated: 1,777 more rows]

## Sheet: Description
baseMeanRibo = average ribosome profiling read count between the two conditions (normalized for "library size")
l2FCRibo = log2 fold-change of ribosome profiling measurements between the two conditions
lfcSERibo = standard error of the log2 fold-change
[truncated: 4 more rows]
